# Supplementary material for: Activation of H–H, HO–H, C(sp2)–H, C(sp3)–H, and RO–H Bonds by Transition-Metal Frustrated Lewis Pairs Based on M/N (M = Rh, Ir) Couples
Source: PubMed Central journal article supplement (PMC9406284; doi:10.1021/acs.inorgchem.2c01902), 2022-08-10
Supplement: ic2c01902_si_001.pdf [file ic2c01902_si_001.pdf]

## Supporting Information

### Activation of H–H, HO–H, C(sp<sup>2</sup>)–H, C(sp<sup>3</sup>)–H and RO–H Bonds by Transition Metal Frustrated Lewis Pairs Based on M/N (M = Rh, Ir) Couples

María Carmona,<sup>[a]</sup> Roberto Pérez,<sup>[a]</sup> Joaquina Ferrer,<sup>\*,[a]</sup> Ricardo Rodríguez,<sup>\*,[a]</sup> Vincenzo Passarelli,<sup>\*,[a]</sup> Fernando J. Lahoz,<sup>[a]</sup> Pilar García-Orduña,<sup>[a]</sup> and Daniel Carmona<sup>\*,[a]</sup>

<sup>[a]</sup> Instituto de Síntesis Química y Catálisis Homogénea (ISQCH), CSIC - Universidad de Zaragoza, Departamento de Química Inorgánica, Pedro Cerbuna 12, 50009 Zaragoza, Spain, E-mail: [dcarmona@unizar.es](mailto:dcarmona@unizar.es) (D. C.), [jfecer@unizar.es](mailto:jfecer@unizar.es) (J. F.), [riromar@unizar.es](mailto:riromar@unizar.es) (R. R.), [passarel@unizar.es](mailto:passarel@unizar.es) (V. P.)

#### Table of Contents

|                                                                                                                                      |     |
|--------------------------------------------------------------------------------------------------------------------------------------|-----|
| 1. General information                                                                                                               | S2  |
| 2. Synthesis and characterization of the complexes 1-8                                                                               | S2  |
| 3. <sup>1</sup> H, <sup>31</sup> P{ <sup>1</sup> H} and <sup>13</sup> C{ <sup>1</sup> H} spectra for the complexes 2, 4, 6, 7, and 8 | S11 |
| 4. CD of complexes 1 and 2                                                                                                           | S19 |
| 5. Dehydrogenation reaction of complexes 5 and 6                                                                                     | S22 |
| 6. Kinetic studies for the H/D exchange at Cp* of complex 3                                                                          | S23 |
| 7. Kinetic studies for acceptorless alcohol dehydrogenation                                                                          | S31 |
| 8. Crystal structure determination of 1, 2, 4, 7, 8a and 8b                                                                          | S35 |
| 9. DFT calculations                                                                                                                  | S41 |
| 10. Energies and coordinates of calculated structures                                                                                | S42 |
| 11. References                                                                                                                       | S99 |

## 1. General information

All preparations have been carried out under argon, unless otherwise stated. All solvents were treated in a PS-400-6 Innovative Technologies Solvent Purification System (SPS). Infrared spectra were recorded on Perkin-Elmer Spectrum-100 (ATR mode) FT-IR spectrometer. Carbon, hydrogen and nitrogen analyses were performed using a Perkin-Elmer 240 B microanalyzer.  $^1\text{H}$ ,  $^{13}\text{C}$  and  $^{31}\text{P}$  spectra were recorded on a Varian UNITY 300, a Bruker AV-300 (300.13 MHz), a Bruker AV-400 (400.16 MHz) or a Bruker AV-500 (500.13 MHz) spectrometers. Chemical shifts are expressed in ppm upfield from  $\text{SiMe}_4$  or 85%  $\text{H}_3\text{PO}_4$  ( $^{31}\text{P}$ ).  $J$  values are given in Hz. Using standard procedures, the correlation spectra of COSY, NOESY, HSQC, HMQC, and HMBC  $^1\text{H}$ -X (X =  $^1\text{H}$ ,  $^{13}\text{C}$ ,  $^{31}\text{P}$ ) were obtained. Mass spectra were obtained with a Micro ToF-Q Bruker Daltonics spectrometer. CD spectra were determined in a 1 cm path length cell by using a Jasco-710 apparatus.

## 2. Synthesis and characterization of the complexes 1-8

### Preparation and characterization of the complexes $[\text{Cp}^*\text{MCl}(\kappa^2\text{N},\text{P}-\text{H}_2\text{L})][\text{SbF}_6]$ (M = Rh, **1**; Ir, **2**)

Under argon atmosphere, to a suspension of the corresponding dimer  $[(\text{Cp}^*\text{MCl})_2(\mu\text{-Cl})_2]$  (834.2 mg, (Rh); 1075.56 mg (Ir); 1.35 mmol) in MeOH (15 mL), a solution of  $\text{H}_2\text{L}$  (1.22 g, 2.70 mmol) in MeOH (5 mL) and  $\text{NaSbF}_6$  (698.4 mg, 2.70 mmol) were added. After 12 h of stirring, the resulting solution was vacuum-evaporated until dryness and the residue was extracted in  $\text{CH}_2\text{Cl}_2$  ( $3 \times 5$  mL). The resulting solution was vacuum-concentrated until ca. 3 mL. The addition of *n*-hexane afforded an orange (Rh) or yellow (Ir) solid which was filtered off, washed with *n*-hexane ( $3 \times 5$  mL) and vacuum-dried. Yield: 2.41 g, 93 % (Rh); 1.11 g, 78 % (Ir). Crystals suitable for X-ray diffraction analysis were obtained by crystallization from  $\text{CH}_2\text{Cl}_2/\text{Et}_2\text{O}/n\text{-pentane}$  solutions of **1** or **2**.

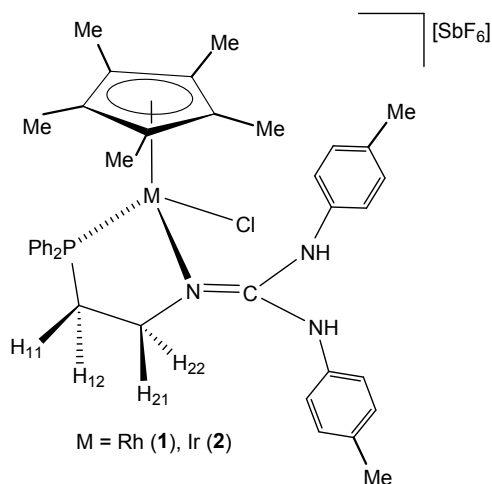

### Compound 1

Anal. calcd for  $C_{39}H_{45}ClF_6N_3PRhSb$ , %: C, 48.75; H, 4.72; N, 4.37. Found, %: C, 48.36; H, 4.52; N, 4.41. HRMS ( $\mu$ -TOF):  $C_{39}H_{45}ClF_6N_3PRhSb [M-SbF_6]^+$ : calcd 724.2089, found 724.2092. IR (solid,  $cm^{-1}$ ):  $\nu(NH)$  3374 (w), 3250-3200 (br);  $\nu(N=C)$  1609 (m);  $\nu(SbF_6)$  657 (s).  $^1H$  NMR (400.16 MHz,  $CDCl_3$ , RT, ppm):  $\delta$  = 9.24 (s, 1H,  $NH_{cis}$  to Rh), 7.64-7.43 (m, 8H,  $PPh_2$ ), 7.34 (s, 1H,  $NH_{trans}$  to Rh), 7.28 (m, 2H,  $PPh_2$ ), 6.88 (d,  $J$  = 8.4 Hz, 2H, CH(*p*-Tolyl)), 6.84 (d,  $J$  = 8.4 Hz, 2H, CH(*p*-Tolyl)), 6.80 (d,  $J$  = 8.4 Hz, 2H, CH(*p*-Tolyl)), 6.74 (d,  $J$  = 8.4 Hz, 2H, CH(*p*-Tolyl)), 4.34 (ddd,  $J$  = 44.5, 13.0, 6.7 Hz, 1H,  $H_{22}$ ), 3.88 (tt,  $J$  = 14.0, 4.1 Hz, 1H,  $H_{21}$ ), 2.83 (td,  $J$  = 14.1, 2.2 Hz, 1H,  $H_{11}$ ), 2.36 (m, 1H,  $H_{12}$ ), 2.16 (s, 3H, Me(*p*-Tolyl)), 2.13 (s, 3H, Me(*p*-Tolyl)), 1.47 (d,  $J$  = 3.6 Hz, 15 H,  $C_5Me_5$ ).  $^{13}C\{^1H\}$  NMR (100.62 MHz,  $CDCl_3$ , RT, ppm):  $\delta$  = 153.85 (C=N), 135.93 (C(*p*-Tolyl)), 135.55 (C(*p*-Tolyl)), 133.95 (d,  $J$  = 9.4 Hz, 2C,  $PPh_2$ ), 132.80 (C(*p*-Tolyl)), 132.66 (C(*p*-Tolyl)), 132.63 (dd,  $J$  = 42.4, 1.1 Hz, C( $PPh_2$ )), 132.13 (d,  $J$  = 9.0 Hz, 2C,  $PPh_2$ ), 131.90 (d,  $J$  = 2.4 Hz,  $PPh_2$ ), 131.79 (d,  $J$  = 2.8 Hz,  $PPh_2$ ), 129.75 (2C, CH(*p*-Tolyl)), 129.64 (2C, CH(*p*-Tolyl)), 129.32 (d,  $J$  = 10.2 Hz, 2C,  $PPh_2$ ), 129.03 (d,  $J$  = 10.8 Hz, 2C,  $PPh_2$ ), 128.28 (d,  $J$  = 54.3 Hz, C( $PPh_2$ )), 119.04 (2C, CH(*p*-Tolyl)), 118.80 (2C, CH(*p*-Tolyl)), 100.90 (dd,  $J$  = 6.7, 2.5 Hz, 5C,  $C_5Me_5$ ), 54.32 (d,  $J$  = 2.2 Hz,  $NCH_2$ ), 34.62 (d,  $J$  = 29.6 Hz,  $PCH_2$ ), 20.79 (Me(*p*-Tolyl)), 20.75 (Me(*p*-Tolyl)), 9.29 (5C,  $C_5Me_5$ ).  $^{31}P\{^1H\}$  NMR (161.98 MHz,  $CDCl_3$ , RT, ppm):  $\delta$  = 51.37 (d,  $J$  = 142.4 Hz).

CD spectra. (*S*)-**1**, CH<sub>2</sub>Cl<sub>2</sub>, 4.39 × 10<sup>-4</sup> M, RT, λ(nm), (Δε): (307 (-4.27), 353 (+5.19), 396 (-2.96), 461 (+3.16). (*R*)-**1**, CH<sub>2</sub>Cl<sub>2</sub>, 5.58 × 10<sup>-4</sup> M, RT, λ(nm), (Δε): (307 (+4.91), 353 (-6.17), 396 (+3.54), 461 (-3.63).

## Compound 2

Anal. calcd for C<sub>39</sub>H<sub>45</sub>ClF<sub>6</sub>IrN<sub>3</sub>PSb: C, 44.60; H, 4.32; N, 4.00. Found: C, 43.95; H, 4.00; N, 4.07.

HRMS ( $\mu$ -TOF): C<sub>39</sub>H<sub>45</sub>ClF<sub>6</sub>IrN<sub>3</sub>PSb [M-SbF<sub>6</sub>]<sup>+</sup>: calcd 814.2657, found 814.2654. IR (cm<sup>-1</sup>): ν(NH) 3370-3050 (br); ν(N=C) 1609 (m); ν(SbF<sub>6</sub>) 657 (s). <sup>1</sup>H NMR (400.16 MHz, CDCl<sub>3</sub>, RT, ppm): δ = 8.93 (s, 1H, NH<sub>cis to Ir</sub>), 7.57-7.33 (m, 8H, PPh<sub>2</sub>), 7.16 (m, H, NH<sub>trans to Ir</sub>, PPh<sub>2</sub>), 6.80 (d, *J* = 8.0 Hz, 2H, CH(*p*-Tolyl)), 6.76 (d, *J* = 8.1 Hz, 2H, CH(*p*-Tolyl)), 6.69 (d, *J* = 8.6 Hz, 2H, CH(*p*-Tolyl)), 6.66 (d, *J* = 7.8 Hz, 2H, CH(*p*-Tolyl)), 4.29 (ddd, *J* = 40.8, 12.9, 6.8 Hz, 1H, H<sub>22</sub>), 3.78 (tt, *J* = 13.9, 4.6 Hz, 1H, H<sub>21</sub>), 2.85 (td, *J* = 13.2, 2.9 Hz, 1H, H<sub>11</sub>), 2.27 (m, 1H, H<sub>12</sub>), 2.09 (s, 3H, Me(*p*-Tolyl)), 2.06 (s, 3H, Me(*p*-Tolyl)), 1.44 (d, *J* = 2.1 Hz, 15 H, C<sub>5</sub>Me<sub>5</sub>). <sup>13</sup>C{<sup>1</sup>H} NMR (100.62 MHz, CDCl<sub>3</sub>, RT, ppm): δ = 154.07 (C=N), 135.79 (C(*p*-Tolyl)), 135.18 (C(*p*-Tolyl)), 133.97 (d, *J* = 10.0 Hz, 2C, PPh<sub>2</sub>), 132.89 (C(*p*-Tolyl)), 132.82 (C(*p*-Tolyl)), 132.39 (d, *J* = 53.7 Hz, C(PPh<sub>2</sub>)), 132.05 (d, *J* = 9.3 Hz, 2C, PPh<sub>2</sub>), 131.89 (d, *J* = 2.3 Hz, PPh<sub>2</sub>), 131.83 (d, *J* = 2.7 Hz, PPh<sub>2</sub>), 129.69 (2C, CH(*p*-Tolyl)), 129.59 (2C, CH(*p*-Tolyl)), 129.16 (d, *J* = 11.2 Hz, 2C, PPh<sub>2</sub>), 129.03 (d, *J* = 11.7 Hz, 2C, PPh<sub>2</sub>), 126.66 (d, *J* = 63.2 Hz, C(PPh<sub>2</sub>)), 119.16 (2C, CH(*p*-Tolyl)), 118.86 (2C, CH(*p*-Tolyl)), 94.43 (d, *J* = 2.7 Hz, 5C, C<sub>5</sub>Me<sub>5</sub>), 57.03 (NCH<sub>2</sub>), 34.95 (d, *J* = 35.5 Hz, PCH<sub>2</sub>), 20.79 (Me(*p*-Tolyl)), 20.75 (Me(*p*-Tolyl)), 8.87 (5C, C<sub>5</sub>Me<sub>5</sub>). <sup>31</sup>P{<sup>1</sup>H} NMR (161.98 MHz, CDCl<sub>3</sub>, RT, ppm): δ = 26.52 (s).

CD spectra. (*R*)-**2**, CH<sub>2</sub>Cl<sub>2</sub>, 3.81 × 10<sup>-4</sup> M, RT, λ(nm), (Δε): 312 (-3.99), 334 (+1.56), 370 (-2.56), 385 (-2.99), 408 (-3.66). (*S*)-**2**, CH<sub>2</sub>Cl<sub>2</sub>, 5.95 × 10<sup>-4</sup> M, RT, λ(nm), (Δε): 312 (+6.10), 334 (-2.31), 370 (+4.23), 385 (+4.82), 408 (+5.75).

**Preparation and characterization of the complexes [Cp\**M*(κ<sup>3</sup>*N,N',P*-HL)][SbF<sub>6</sub>] (M = Rh, **3**; Ir, **4**).**

At 278 K, to a solution of NaOH (25.0 mg, 0.62 mmol) in H<sub>2</sub>O (5 mL) a solution of the corresponding complex [Cp\**M*Cl(κ<sup>2</sup>*N,P*-H<sub>2</sub>L)][SbF<sub>6</sub>] (400.0 mg, (Rh); 441.1 mg, (Ir); 0.42 mmol) in 1:1 (v/v) THF/toluene (20 mL) was added. The resulting biphasic suspension was stirred for 1.5 hours. Then, after the addition of 35 mL of H<sub>2</sub>O, the organic phase was extracted with a 1:1 (v/v) solution of THF/toluene (3 × 10 mL) and evaporated to dryness. The obtained dark red (Rh) or yellow (Ir) residue was washed with Et<sub>2</sub>O (3 × 5 mL) and *n*-pentane (3 × 5 mL) and vacuum-dried. Recrystallization in THF/Et<sub>2</sub>O/*n*-pentane afforded complexes **3** and **4**. Yield: 280.9 mg, 73 % (Rh); 349.1 mg, 82 % (Ir). Crystals suitable for X-ray diffraction analysis were obtained by crystallization from THF/Et<sub>2</sub>O/*n*-pentane solutions.

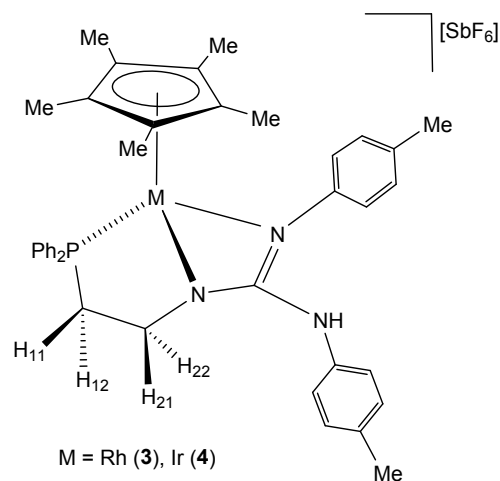

Compound **3**. For analytical and spectroscopic data of this complex see ref. S1.

Compound **4**.

Anal. calcd for C<sub>39</sub>H<sub>44</sub>F<sub>6</sub>IrN<sub>3</sub>PSb: C, 46.21; H, 4.37; N, 4.15. Found: C, 46.20; H, 4.57; N, 4.01. HRMS ( $\mu$ -TOF): C<sub>39</sub>H<sub>44</sub>F<sub>6</sub>IrN<sub>3</sub>PSb [M-SbF<sub>6</sub>]<sup>+</sup>: calcd 778.2899, found 778.2861. IR (cm<sup>-1</sup>):  $\nu$ (NH) 3362 (w);  $\nu$ (N=C) 1595 (m);  $\nu$ (SbF<sub>6</sub>) 653 (s). <sup>1</sup>H NMR (300.13 MHz, THF-d<sub>8</sub>, RT, ppm):  $\delta$  = 8.00 (brs, 1H, NH),

7.86 (m, 2H, PPh<sub>2</sub>), 7.55 (m, 3H, PPh<sub>2</sub>), 7.38 (m, 3H, PPh<sub>2</sub>), 7.19 (m, 2H, PPh<sub>2</sub>), 6.85 (d, *J* = 8.5 Hz, 4H, CH(*p*-Tolyl)), 6.75 (brd, *J* = 8.5 Hz, 2H, CH(*p*-Tolyl)), 6.60 (d, *J* = 8.5 Hz, 2H, CH(*p*-Tolyl)), 3.23 (ddd, *J* = 34.9, 13.6, 6.3 Hz, 1H, H<sub>22</sub>), 3.01 (tt, *J* = 12.8, 5.1 Hz, 1H, H<sub>21</sub>), 2.68 - 2.40 (m, 2H, H<sub>11</sub>, H<sub>12</sub>), 2.11 (s, 3H, Me(*p*-Tolyl)), 2.08 (s, 3H, Me(*p*-Tolyl)), 1.41 (d, *J* = 2.0 Hz, 15H, C<sub>5</sub>Me<sub>5</sub>). <sup>13</sup>C{<sup>1</sup>H} NMR (125.77 MHz, THF-*d*<sub>8</sub>, RT, ppm): δ = 169.65 (C=N), 139.98 (C(*p*-Tolyl)), 138.12 (C(*p*-Tolyl)), 135.50 (d, *J* = 11.6 Hz, 2C, PPh<sub>2</sub>), 134.65 (d, *J* = 53.6 Hz, C(PPh<sub>2</sub>)), 133.77 (C(*p*-Tolyl)), 132.88 (d, *J* = 1.7 Hz, PPh<sub>2</sub>), 132.67 (C(*p*-Tolyl)), 132.17 (d, *J* = 9.5 Hz, 2C, PPh<sub>2</sub>), 131.89 (d, *J* = 2.0 Hz, PPh<sub>2</sub>), 131.59 (d, *J* = 52.6 Hz, C(PPh<sub>2</sub>)), 130.45 (2C, CH(*p*-Tolyl)), 130.18 (d, *J* = 10.1 Hz, 2C, PPh<sub>2</sub>), 130.17 (2C, CH(*p*-Tolyl)), 129.69 (d, *J* = 10.6 Hz, 2C, PPh<sub>2</sub>), 123.94 (2C, CH(*p*-Tolyl)), 119.71 (2C, CH(*p*-Tolyl)), 93.52 (d, *J* = 2.9 Hz, 5C, C<sub>5</sub>Me<sub>5</sub>), 54.55 (NCH<sub>2</sub>), 35.00 (d, *J* = 38.0 Hz, PCH<sub>2</sub>), 20.96 (Me(*p*-Tolyl)), 20.91 (Me(*p*-Tolyl)), 9.11 (5C, C<sub>5</sub>Me<sub>5</sub>). <sup>31</sup>P{<sup>1</sup>H} NMR (121.42 MHz, THF-*d*<sub>8</sub>, RT, ppm): δ = 27.75 (s).

**Preparation and characterization of the complexes [Cp\*MH(κ<sup>2</sup>N,*P*-H<sub>2</sub>L)][SbF<sub>6</sub>] (M = Rh, **5**; Ir, **6**)**

To a high-pressure NMR tube containing a solution of the corresponding complex [Cp\*M(κ<sup>3</sup>N,N',*P*-HL)][SbF<sub>6</sub>] (27.4 mg, (Rh); 30.7 mg, (Ir); 0.030 mmol) in THF-*d*<sub>8</sub> (0.45 mL), H<sub>2</sub> (4 bar) was added and the resulting solution was monitored by NMR. After 4 h at room temperature, the conversion to the rhodium complex **5** was complete. Conversion to the iridium complex **6** was complete after 24 h at 373 K. Both complexes were characterized in situ (under H<sub>2</sub> atmosphere) by NMR. Crude complexes **5** and **6** were obtained by evaporation of the solvent. Yield: 19.1 mg, 69 % (**5**); 22.1 mg, 72 % (**6**). Crystals suitable for X-ray diffraction analysis were obtained from MeOH/diethyl ether solutions of **5**.

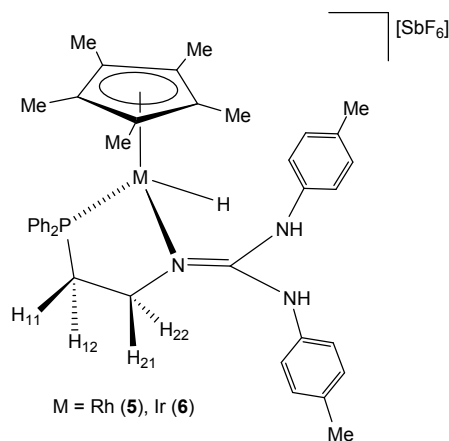

Compound **5**. For analytical and spectroscopic data of this complex see ref. S1.

Compound **6**.

Anal. calcd for  $C_{39}H_{46}F_6IrN_3PSb$ : C, 46.12; H, 4.56; N, 4.14. Found: C, 46.52; H, 5.00; N, 4.14. HRMS ( $\mu$ -TOF):  $C_{39}H_{46}IrN_3P [M-SbF_6]^+$ : calcd 780.3055, found 780.3031. IR ( $cm^{-1}$ ):  $\nu(NH)$  3374, 3288 (w);  $\nu(IrH)$  2921 (m);  $\nu(N=C)$  1605 (m);  $\nu(SbF_6)$  654 (s).  $^1H$  NMR (400.16 MHz,  $THF-d_8$ , RT, ppm):  $\delta$  = 7.99 (br, 1H,  $NH_{cis\ to\ Ir}$ ), 7.60 (m, 2H,  $PPh_2$ ), 7.49 (s, 1H,  $NH_{trans\ to\ Ir}$ ), 7.38 (m, 6H,  $PPh_2$ ), 7.12 (m, 2H,  $PPh_2$ ), 6.96 (d,  $J$  = 8.1 Hz, 2H,  $CH(p-Tolyl)$ ), 6.92 (d,  $J$  = 8.4 Hz, 2H,  $CH(p-Tolyl)$ ), 6.85 (d,  $J$  = 8.5 Hz, 2H,  $CH(p-Tolyl)$ ), 6.72 (d,  $J$  = 8.5 Hz, 2H,  $CH(p-Tolyl)$ ), 3.98 (ddd,  $J$  = 40.6, 12.5, 6.5 Hz, 1H,  $H_{22}$ ), 3.15 (tt,  $J$  = 13.3, 4.3 Hz, 1H,  $H_{21}$ ), 2.82 (td,  $J$  = 12.9, 3.8 Hz, 1H,  $H_{11}$ ), 2.11 (s, 3H,  $Me(p-Tolyl)$ ), 2.10 (s, 3H,  $Me(p-Tolyl)$ ), 1.86 (m, 1H,  $H_{12}$ ), 1.61 (d,  $J$  = 1.8 Hz, 15H,  $C_5Me_5$ ), -14.16 (d,  $J$  = 32.3 Hz, 1H, IrH).  $^{13}C\{^1H\}$  NMR (100.62 MHz,  $THF-d_8$ , RT, ppm):  $\delta$  = 155.12 (d,  $J$  = 1.1 Hz, C=N), 138.70 (C( $p-Tolyl$ )), 137.66 (C( $p-Tolyl$ )), 135.47 (d,  $J$  = 38.9 Hz, C( $PPh_2$ )), 135.42 (d,  $J$  = 11.1 Hz, 2C,  $PPh_2$ ), 134.89 (d,  $J$  = 55.7 Hz, C( $PPh_2$ )), 134.55 (C( $p-Tolyl$ )), 133.17 (C( $p-Tolyl$ )), 132.42 (d,  $J$  = 2.7 Hz, P  $PPh_2$ ), 132.28 (d,  $J$  = 9.6 Hz, 2C,  $PPh_2$ ), 131.66 (d,  $J$  = 2.3 Hz,  $PPh_2$ ), 130.96 (2C,  $CH(p-Tolyl)$ ), 130.92 (2C,  $CH(p-Tolyl)$ ), 129.68 (d,  $J$  = 10.5 Hz, 2C,  $PPh_2$ ), 129.64 (d,  $J$  = 11.1 Hz, 2C,  $PPh_2$ ), 121.05 (2C,  $CH(p-Tolyl)$ ), 119.33 (2C,  $CH(p-Tolyl)$ ), 94.93 (d,  $J$  = 2.8 Hz, 5C,  $C_5Me_5$ ), 60.66 (d,  $J$  = 1.6 Hz,

NCH<sub>2</sub>), 37.98 (d, *J* = 36.1 Hz, PCH<sub>2</sub>), 20.88 (Me(*p*-Tolyl)), 20.85 (Me(*p*-Tolyl)), 10.23 (5C, C<sub>5</sub>Me<sub>5</sub>).

<sup>31</sup>P{<sup>1</sup>H} NMR (161.98 MHz, THF-*d*<sub>8</sub>, RT, ppm): δ = 27.88 (s).

### Synthesis and characterization of the metallated complexes [Cp\**M*(κ<sup>3</sup>C,N,*P*-H<sub>2</sub>L-H)][SbF<sub>6</sub>] (M = Rh, **7**; Ir, **8**)

In a sealed NMR tube, 38.2 mg (0.040 mmol) of complex **3** or 40.1 mg (0.040 mmol) of complex **4** were dissolved in 0.5 mL of [D<sub>8</sub>]THF/H<sub>2</sub>O (4:1, v/v). The resulting solution was heated at 383 and the reaction was monitored by <sup>1</sup>H and <sup>31</sup>P NMR. After 24 (Rh) or 32 hours (Ir) of reaction, the resulting yellow solution was vacuum-evaporated until dryness. Pure complexes **7** and **8** were isolated without further purification. Yield: 25.5 mg, 69 % (Rh): 28.5 mg, 74 % (Ir). Crystals suitable for X-ray diffraction analysis were obtained by crystallization from THF/Et<sub>2</sub>O solutions of **7**. Crystals of **8a** were obtained from CH<sub>3</sub>OH/acetone/Et<sub>2</sub>O/*n*-pentane (1/1/2/2, v/v/v/v) solutions and of **8b** by slow evaporation of CH<sub>2</sub>Cl<sub>2</sub> solutions.

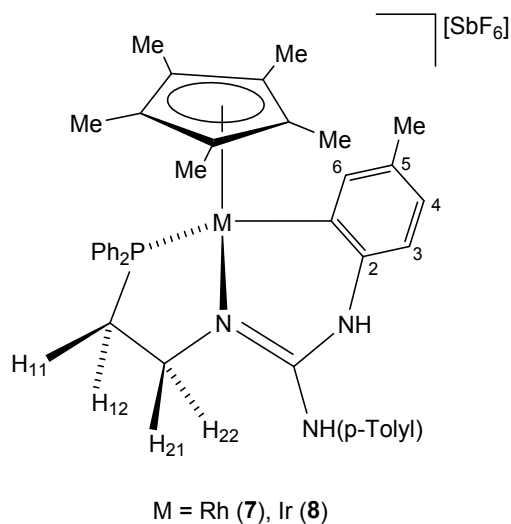

#### Compound **7**.

Anal. calcd for C<sub>39</sub>H<sub>44</sub>F<sub>6</sub>N<sub>3</sub>PRhSb·H<sub>2</sub>O: C, 49.71; H, 4.92; N, 4.46. Found: C, 50.00; H, 4.60; N, 5.05.

HRMS ( $\mu$ -TOF): C<sub>39</sub>H<sub>44</sub>F<sub>6</sub>N<sub>3</sub>PRhSb [M-SbF<sub>6</sub>]<sup>+</sup>: calcd 688.2322, found 688.2313. IR (cm<sup>-1</sup>): ν(NH) 3373 (w), 2916 (w); ν(C=N) 1614 (m); ν(SbF<sub>6</sub>) 654 (s). <sup>1</sup>H NMR (400.16 MHz, THF-*d*<sub>8</sub>, RT, ppm): δ =



8.41 (s, 1H, NH<sub>cis</sub> to Rh), 8.36 (s, 1H, NH<sub>trans</sub> to Rh), 7.74-7.55 (m, 5H, CH(PPh<sub>2</sub>)), 7.41-7.19 (m, 5H, CH(PPh<sub>2</sub>)), 7.17 (dd, *J* = 8.8, 0.6 Hz, 2H, CH(*p*-Tolyl)<sub>trans</sub> to Rh), 6.96 (dd, *J* = 8.4, 2.4 Hz, 2H, CH(*p*-Tolyl)<sub>trans</sub> to Rh), 6.67 (brs, 1H, 6-CH(*p*-Tolyl)), 6.53 (dd, *J* = 7.8, 1.7 Hz, 1H, 3-CH(*p*-Tolyl)), 6.49 (d, *J* = 7.8 Hz, 1H, 4-CH(*p*-Tolyl)), 4.03 (m, 1H, H<sub>22</sub>), 3.69 (m, 1H, H<sub>21</sub>), 2.62 (m, 1H, H<sub>11</sub>), 2.35 (m, 1H, H<sub>12</sub>), 2.30 (s, 3H, Me(*p*-Tolyl)<sub>trans</sub> to Rh), 1.94 (s, 3H, Me(*p*-Tolyl)), 1.48 (d, *J* = 3.0 Hz, 15H, C<sub>5</sub>Me<sub>5</sub>). <sup>13</sup>C{<sup>1</sup>H} NMR (75.48 MHz, THF-*d*<sub>8</sub>, RT, ppm): δ = 152.88 (brd, *J* = 1.4 Hz, C=N), 142.35 (d, *J* = 6.8 Hz, 6-CH(*p*-Tolyl)), 141.15 (dd, *J* = 31.7, 13.8 Hz, CRh), 138.79 (d, *J* = 1.8 Hz, 2-C(*p*-Tolyl)), 138.63 (C(*p*-Tolyl)<sub>trans</sub> to Rh), 133.94 (5-C(*p*-Tolyl)), 133.76 (C(*p*-Tolyl)<sub>trans</sub> to Rh), 133.15 (d, *J* = 8.7 Hz, 2C, CH(PPh<sub>2</sub>)), 133.14 (d, *J* = 41.3 Hz, C(PPh<sub>2</sub>)), 133.01 (d, *J* = 8.0 Hz, 2C, CH(PPh<sub>2</sub>)), 132.00 (d, *J* = 2.3 Hz, CH(PPh<sub>2</sub>)), 131.14 (d, *J* = 2.8 Hz, CH(PPh<sub>2</sub>)), 130.97 (dd, *J* = 47.3, 2.4 Hz, C(PPh<sub>2</sub>)), 130.88 (2C, CH(*p*-Tol)<sub>trans</sub> to Rh), 129.97 (d, *J* = 9.8 Hz, 2C, CH(PPh<sub>2</sub>)), 129.95 (d, *J* = 10.2 Hz, 2C, CH(PPh<sub>2</sub>)), 125.33 (3-CH(*p*-Tolyl)), 120.92 (2C, CH(*p*-Tolyl)<sub>trans</sub> to Rh), 116.09 (4-CH(*p*-Tolyl)), 100.77 (brs, 5C, C<sub>5</sub>Me<sub>5</sub>), 52.72 (NCH<sub>2</sub>), 34.23 (d, *J* = 34.3 Hz, PCH<sub>2</sub>), 20.88 (Me(*p*-Tolyl)<sub>trans</sub> to Rh), 20.73 (Me(*p*-Tolyl)), 9.42 (5C, C<sub>5</sub>Me<sub>5</sub>). <sup>31</sup>P{<sup>1</sup>H} NMR (121.42 MHz, THF-*d*<sub>8</sub>, RT, ppm): δ = 46.45 (d, *J* = 153.3 Hz).

### Compound 8

Anal. calcd for C<sub>39</sub>H<sub>44</sub>F<sub>6</sub>IrN<sub>3</sub>PSb·3H<sub>2</sub>O: C, 43.87; H, 4.72; N, 3.94. Found: C, 43.42; H, 4.58; N, 3.46. HRMS (*μ*-TOF): C<sub>39</sub>H<sub>44</sub>F<sub>6</sub>IrN<sub>3</sub>PSb [M-SbF<sub>6</sub>]<sup>+</sup>: calcd 778.2899, found 778.2097. IR (cm<sup>-1</sup>): ν(NH) 3375 (w); ν(N=C) 1625 (m); ν(SbF<sub>6</sub>) 654 (s). <sup>1</sup>H NMR (400.16 MHz, THF-*d*<sub>8</sub>, RT, ppm): δ = 8.43 (s, 1H, NH<sub>trans</sub> to Ir), 8.34 (s, 1H, NH<sub>cis</sub> to Ir), 7.65-7.35 (m, 10H, CH(PPh<sub>2</sub>)), 7.16 (brd, *J* = 8.2 Hz, 2H, CH(*p*-Tolyl)<sub>trans</sub> to Ir), 6.98 (brd, *J* = 8.4, 2.4 Hz, 2H, CH(*p*-Tolyl)<sub>trans</sub> to Ir), 6.77-6.51 (m, 2H, 6-CH(*p*-Tolyl), 4-CH(*p*-Tolyl)), 6.46 (dd, *J* = 7.8, 1.3 Hz, 1H, 3-CH(*p*-Tolyl)), 4.14 (ddd, *J* = 34.4, 12.2, 6.4 Hz, 1H, H<sub>22</sub>), 3.59 (m, 1H, H<sub>21</sub>), 2.46 (ptd, *J* = 12.2, 4.1 Hz, 1H, H<sub>11</sub>), 2.30 (s, 3H, Me(*p*-Tolyl)<sub>trans</sub> to Ir), 2.18 (m, 1H, H<sub>12</sub>), 1.83 (s, 3H, Me(*p*-Tolyl)), 1.52 (d, *J* = 2.0 Hz, 15H, C<sub>5</sub>Me<sub>5</sub>). <sup>13</sup>C{<sup>1</sup>H} NMR (75.48 MHz, THF-*d*<sub>8</sub>, RT, ppm): δ = 153.22 (brd, *J* = 2.5 Hz, C=N), 142.79 (d, *J* = 4.4 Hz, 6-CH(*p*-Tolyl)), 139.71

(brs, 2-C(*p*-Tolyl)), 138.65 (C(*p*-Tolyl)<sub>trans to Ir</sub>), 134.01 (d,  $J = 52.2$  Hz, C(PPh<sub>2</sub>)), 133.92 (5-C(*p*-Tolyl)), 133.67 (C(*p*-Tolyl)<sub>trans to Ir</sub>), 133.43 (d,  $J = 9.1$  Hz, 2C, CH(PPh<sub>2</sub>)), 133.05 (d,  $J = 9.9$  Hz, 2C, CH(PPh<sub>2</sub>)), 131.98 (d,  $J = 2.5$  Hz, CH(PPh<sub>2</sub>)), 131.37 (d,  $J = 2.8$  Hz, CH(PPh<sub>2</sub>)), 130.90 (2C, CH(*p*-Tolyl)<sub>trans to Ir</sub>), 129.75 (d,  $J = 10.3$  Hz, 2C, CH(PPh<sub>2</sub>)), 129.34 (d,  $J = 10.4$  Hz, 2C, CH(PPh<sub>2</sub>)), 128.65 (d,  $J = 56.7$  Hz, C(PPh<sub>2</sub>)), 125.36 (3-CH(*p*-Tolyl)), 123.61 (d,  $J = 9.1$  Hz, C<sub>Ir</sub>), 121.23 (2C, CH(*p*-Tolyl)<sub>trans to Ir</sub>), 115.73 (4-CH(*p*-Tolyl)), 95.45 (d,  $J = 2.9$  Hz, 5C, C<sub>5</sub>Me<sub>5</sub>), 57.33 (brd,  $J = 2.1$  Hz, NCH<sub>2</sub>), 35.29 (d,  $J = 38.8$  Hz, PCH<sub>2</sub>), 20.93 (Me(*p*-Tolyl)<sub>trans to Ir</sub>), 20.68 (Me(*p*-Tolyl)), 9.19 (5C, C<sub>5</sub>Me<sub>5</sub>). <sup>31</sup>P{<sup>1</sup>H} NMR (161.98 MHz, THF-*d*<sub>8</sub>, RT, ppm):  $\delta = 19.01$  (s).

3.  $^1\text{H}$ ,  $^{31}\text{P}\{^1\text{H}\}$  and  $^{13}\text{C}\{^1\text{H}\}$  spectra for the complexes 2, 4, 6, 7 and 8

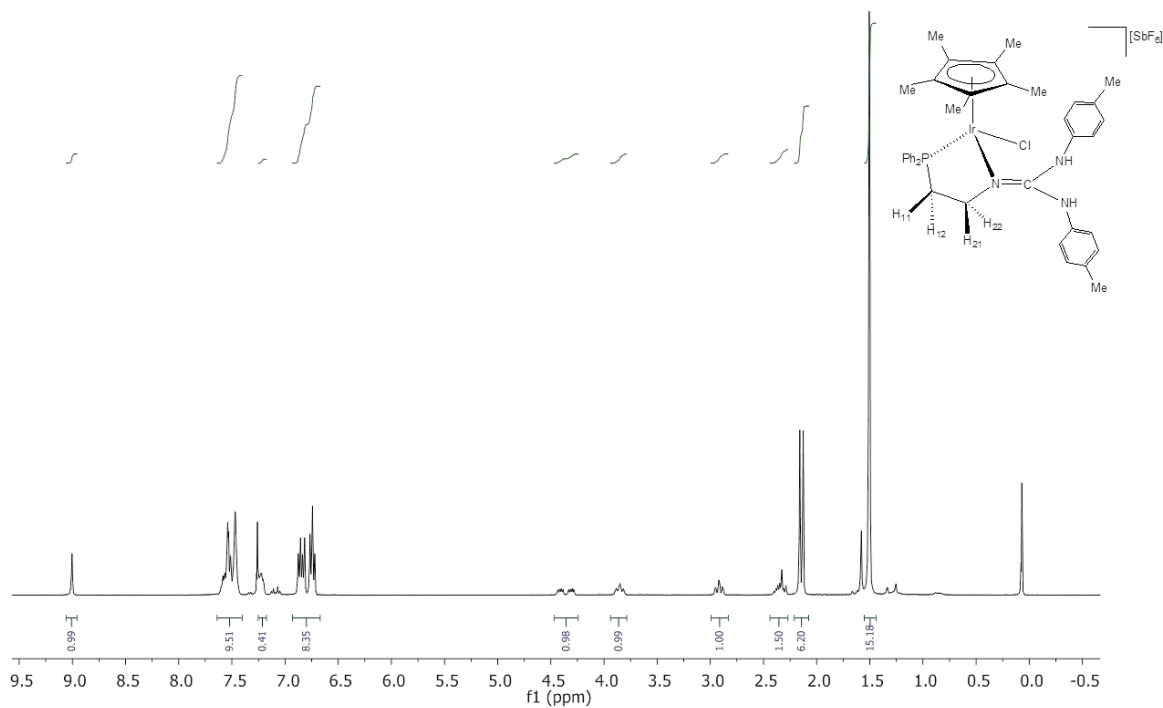

Figure S1.  $^1\text{H}$  NMR ( $\text{CDCl}_3$ , RT) spectrum of 2.

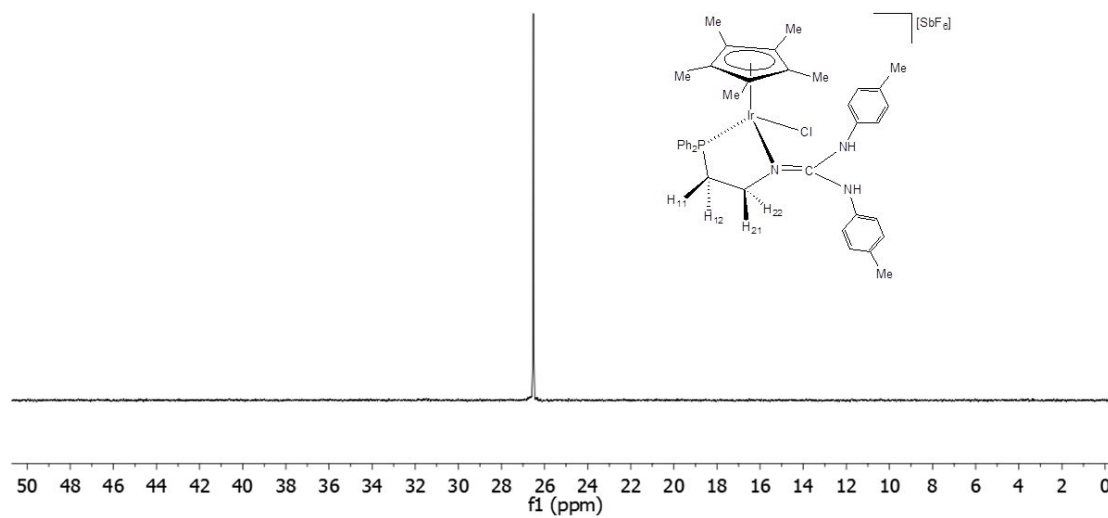

Figure S2.  $^{31}\text{P}\{^1\text{H}\}$  ( $\text{CDCl}_3$ , RT) spectrum of 2.

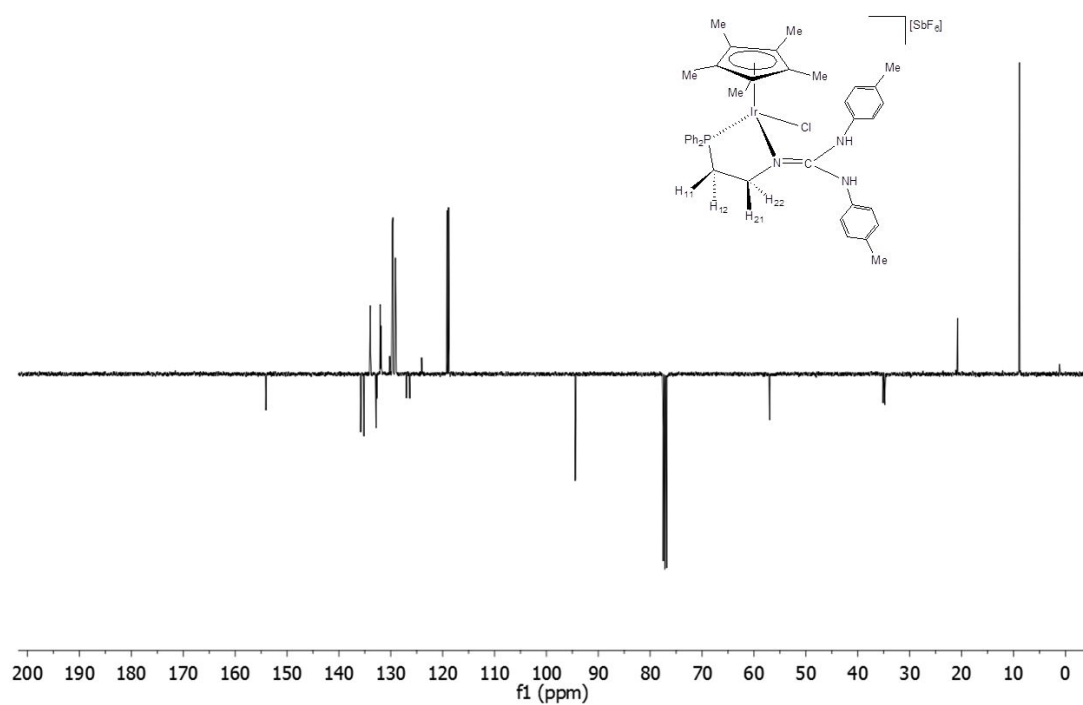

**Figure S3.**  $^{13}\text{C}\{^1\text{H}\}$  ( $\text{CDCl}_3$ , RT) spectrum of **2**.

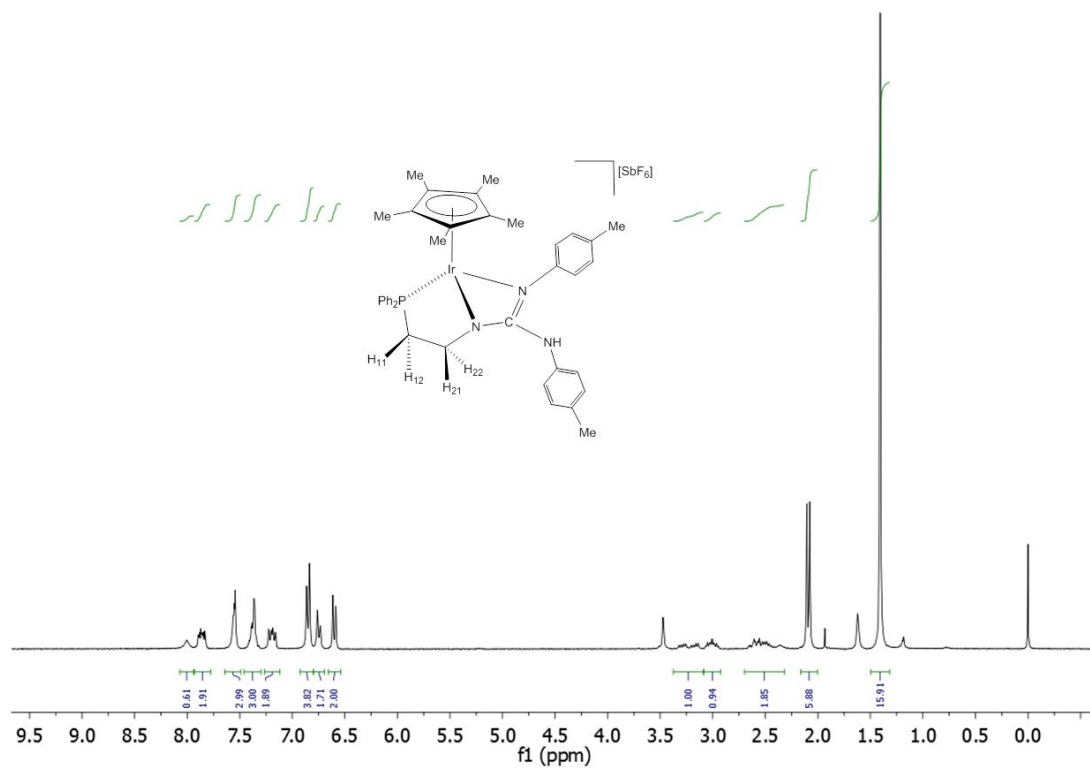

**Figure S4.**  $^1\text{H}$  NMR ( $\text{THF-}d_8$ , RT) spectrum of **4**.

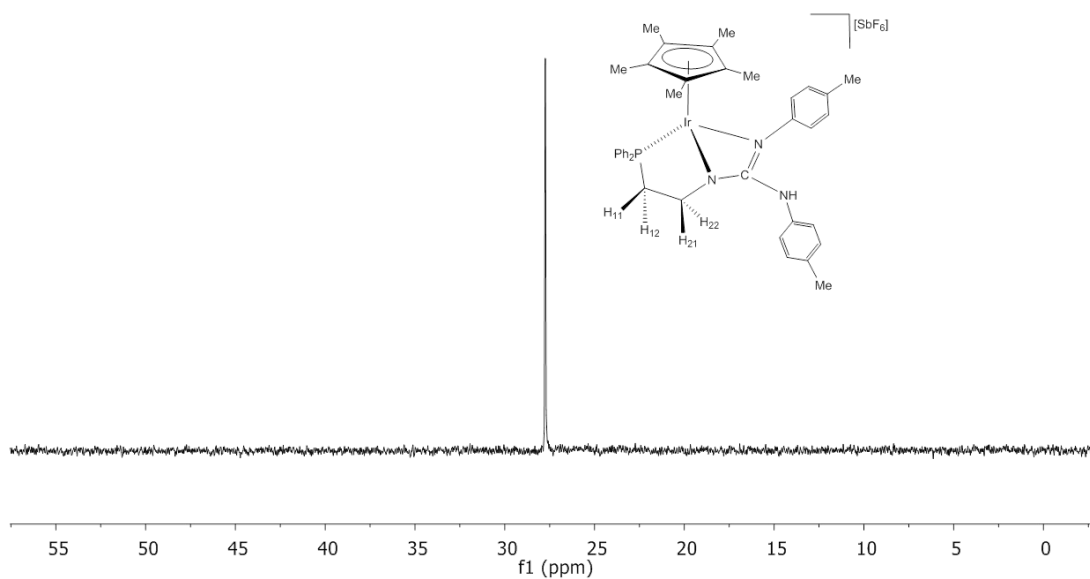

**Figure S5.**  $^{31}\text{P}\{^1\text{H}\}$  (THF- $d_8$ , RT) spectrum of **4**.

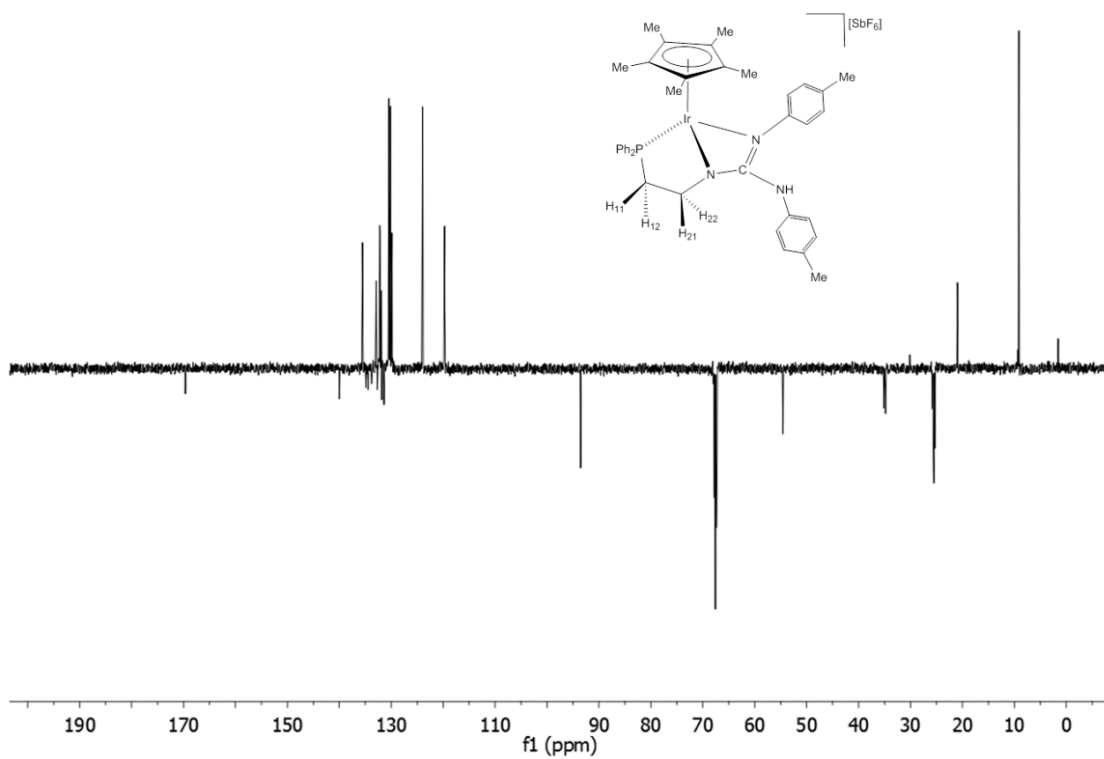

**Figure S6.**  $^{13}\text{C}\{^1\text{H}\}$  (THF- $d_8$ , RT) spectrum of **4**.

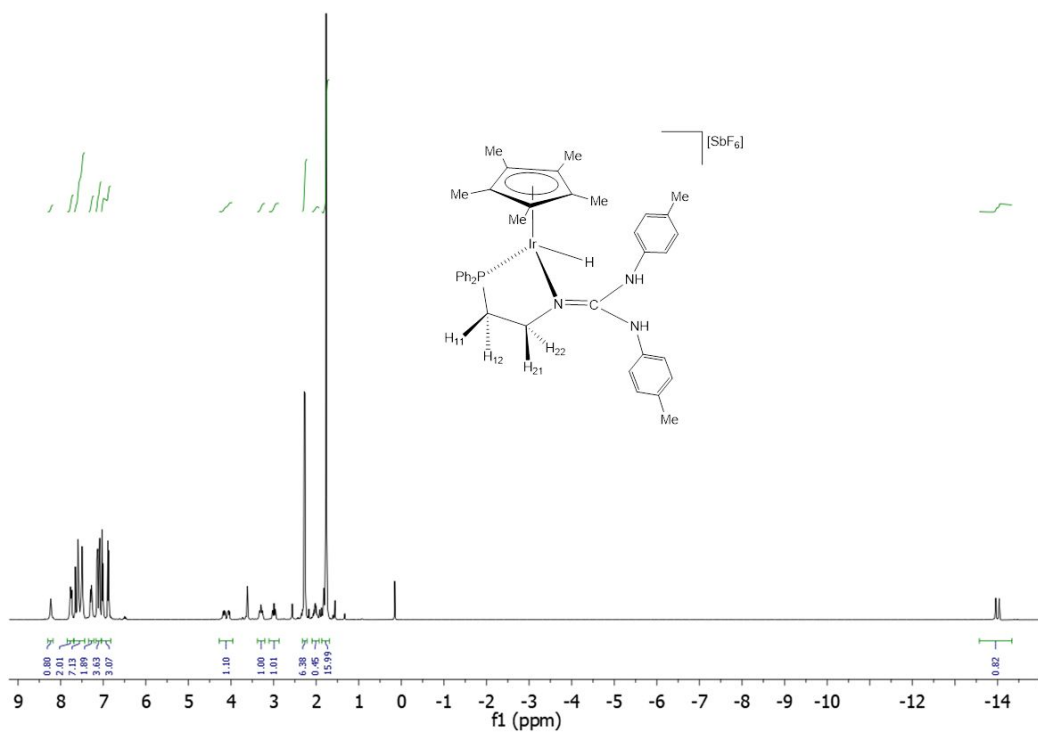

**Figure S7.**  $^1\text{H}$  NMR (THF- $d_8$ , RT) spectrum of **6**.

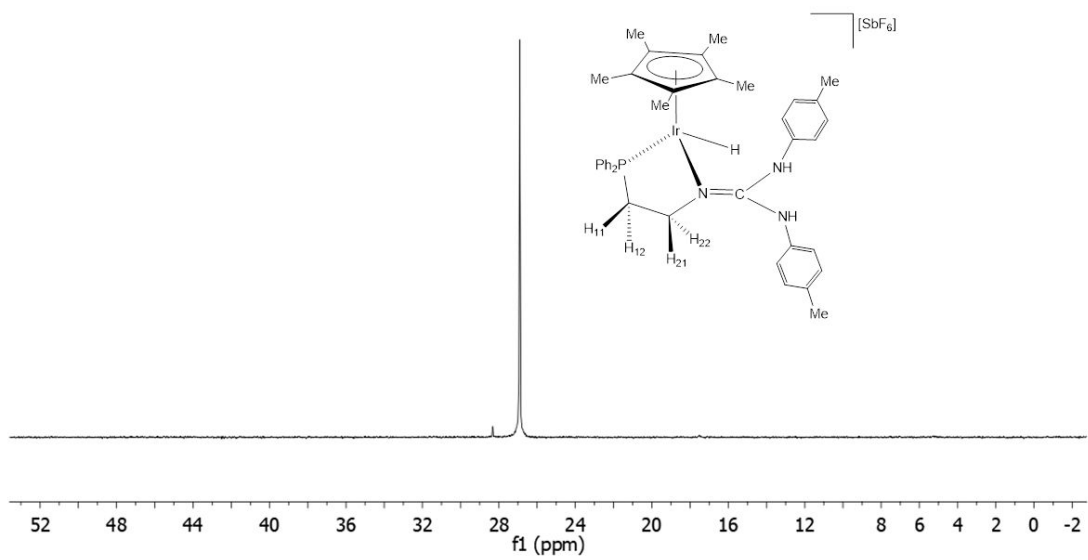

**Figure S8.**  $^{31}\text{P}\{^1\text{H}\}$  (THF- $d_8$ , RT) spectrum of **6**.

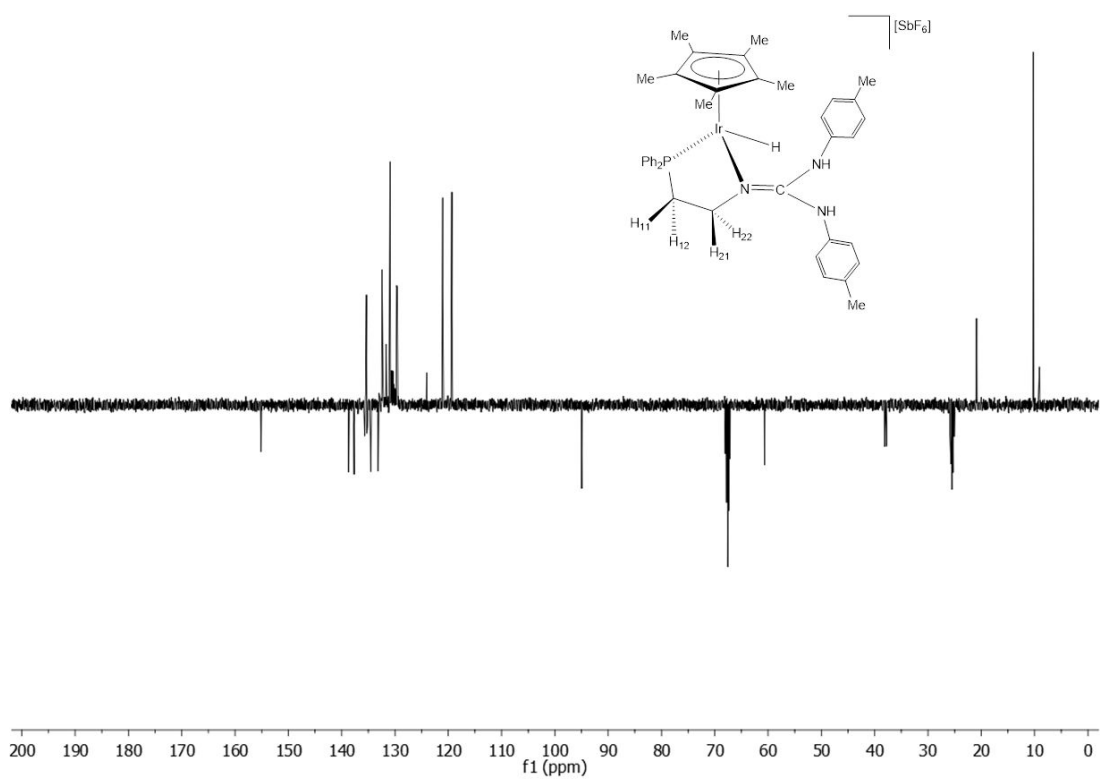

Figure S9.  $^{13}\text{C}\{^1\text{H}\}$  (THF- $d_8$ , RT) spectrum of **6**.

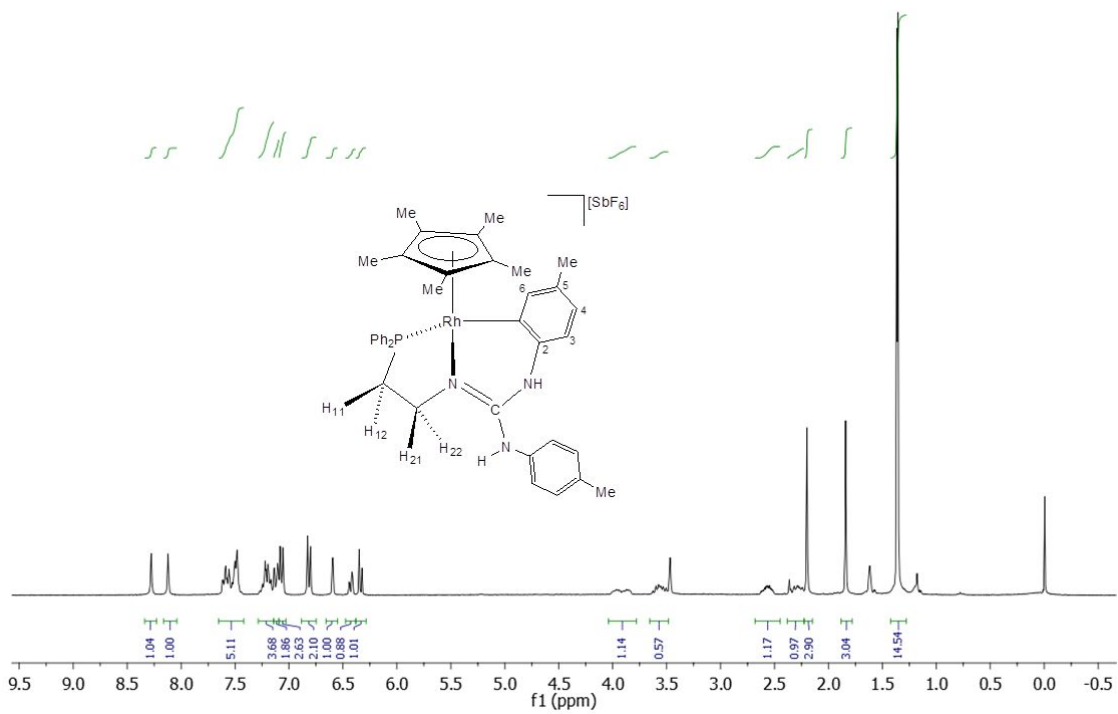

Figure S10.  $^1\text{H}$  NMR (THF- $d_8$ , RT) spectrum of **7**.

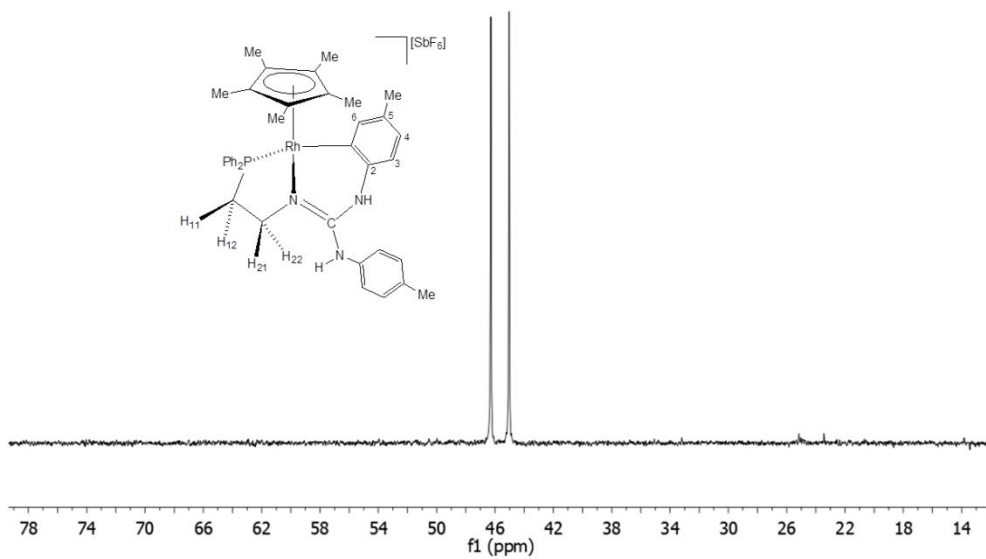

**Figure S11.**  $^{31}\text{P}\{^1\text{H}\}$  (THF- $d_8$ , RT) spectrum of 7.

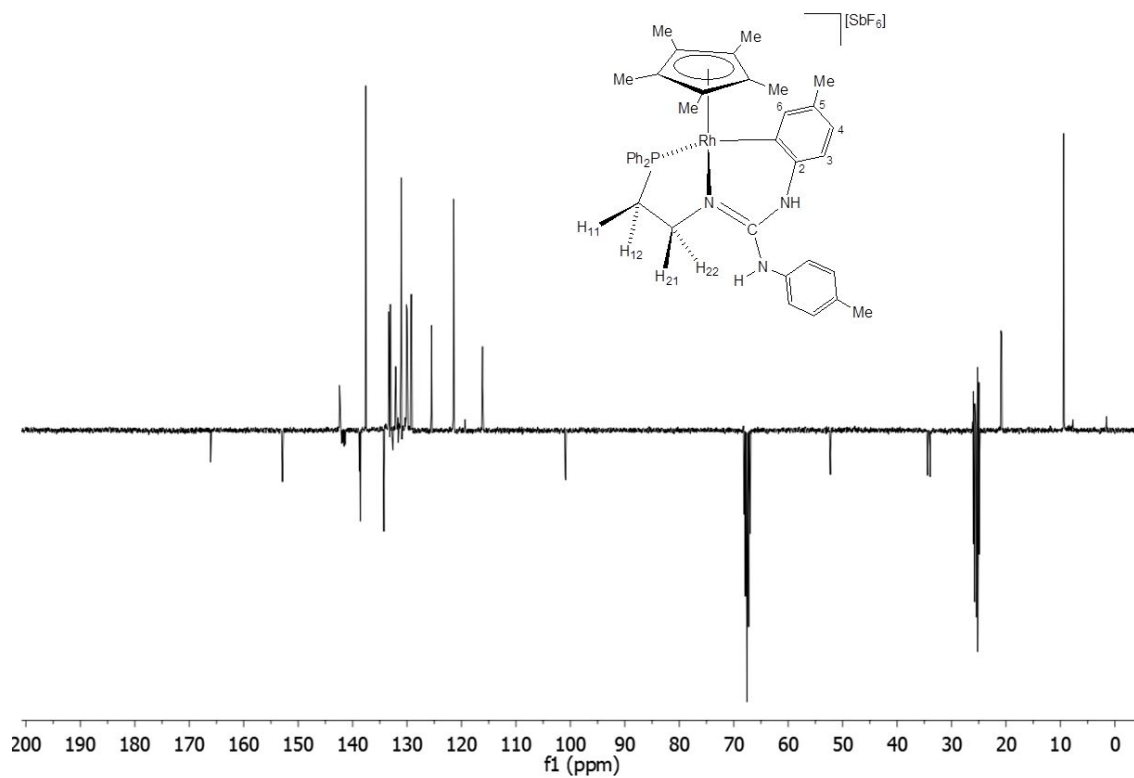

**Figure S12.**  $^{13}\text{C}\{^1\text{H}\}$  (THF- $d_8$ , RT) spectrum of 7.



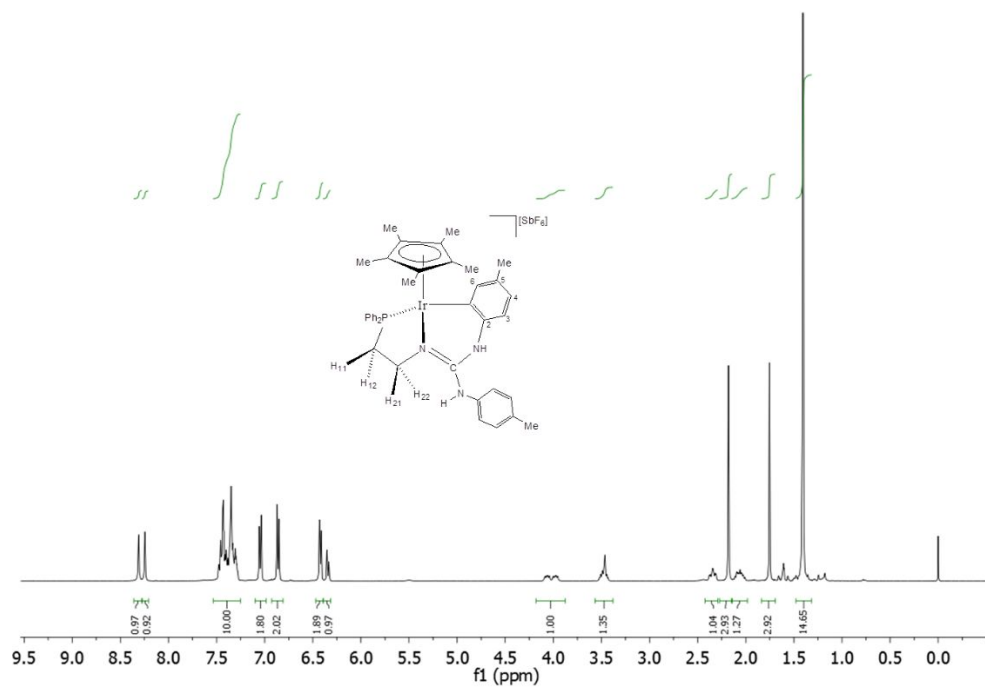

**Figure S13.**  $^1\text{H}$  NMR ( $\text{THF-}d_8$ , RT) spectrum of **8**.

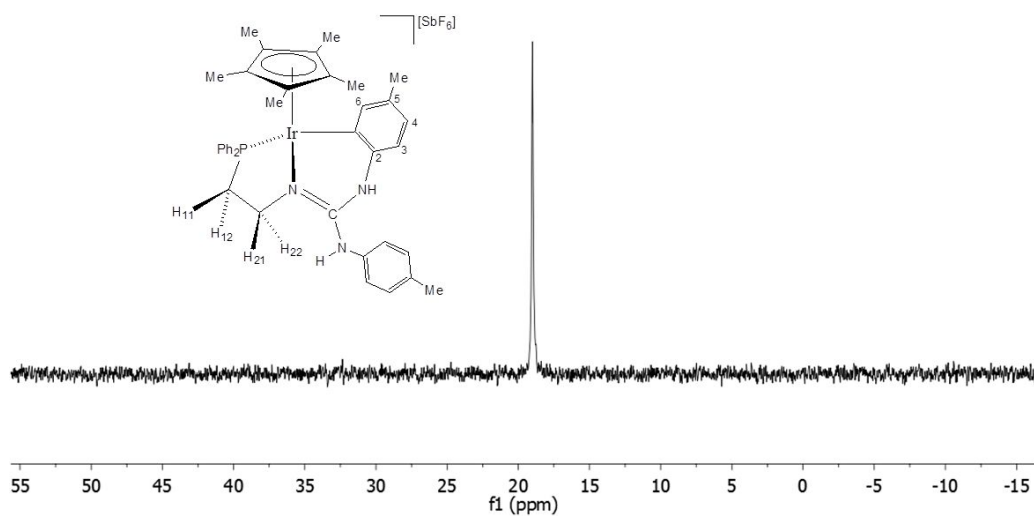

**Figure S14.**  $^{31}\text{P}\{^1\text{H}\}$  ( $\text{THF-}d_8$ , RT) spectrum of **8**.

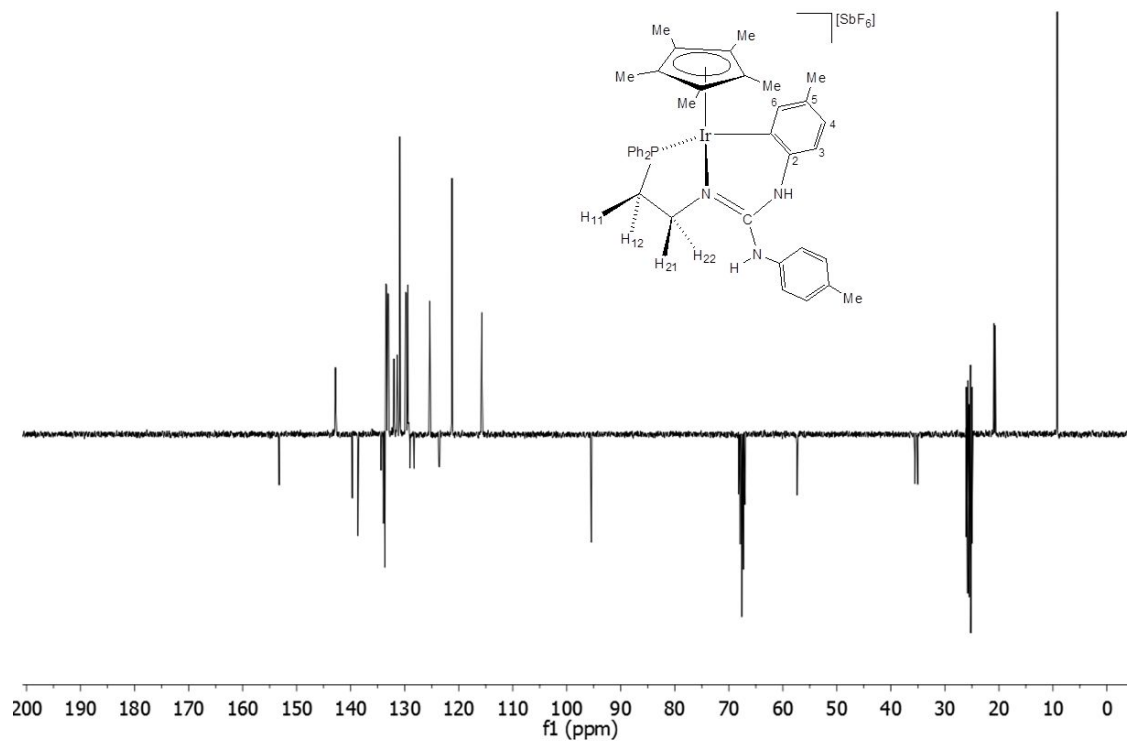

**Figure S15.**  $^{13}\text{C}\{^1\text{H}\}$  (THF- $d_8$ , RT) spectrum of **8**.

#### 4. CD of complexes 1 and 2

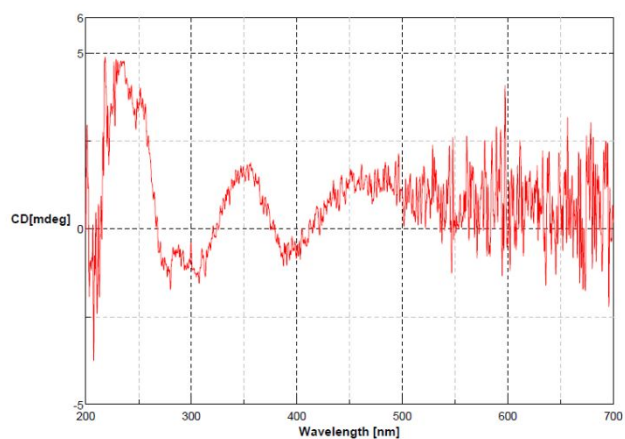

**Figure S16.** CD spectra of the measured crystal by X-ray diffraction corresponding to  $S_{Rh-1}$  in  $CH_2Cl_2$ .

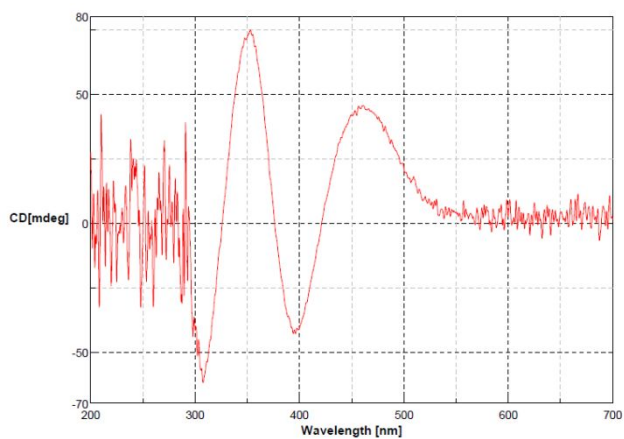

**Figure S17.** CD spectra of  $S_{Rh-1}$  ( $4.39 \times 10^{-4}$  M) in  $CH_2Cl_2$ .

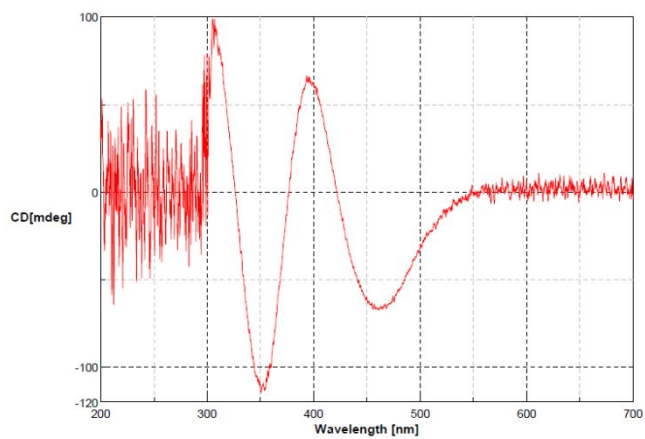

**Figure S18.** CD spectra of  $R_{Rh-1}$  ( $5.58 \times 10^{-4}$  M) in  $CH_2Cl_2$ .

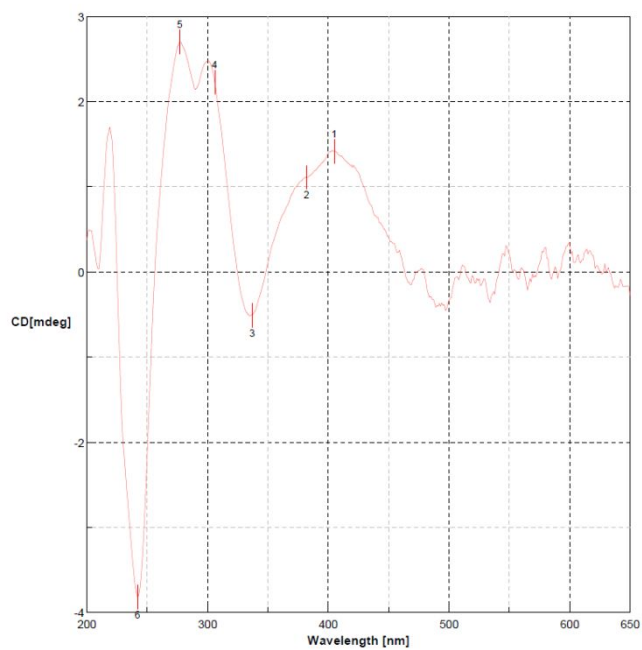

**Figure S19.** CD spectra of the measured crystal by X-ray diffraction corresponding to  $S_{IIr-2}$  in  $CH_2Cl_2$ .

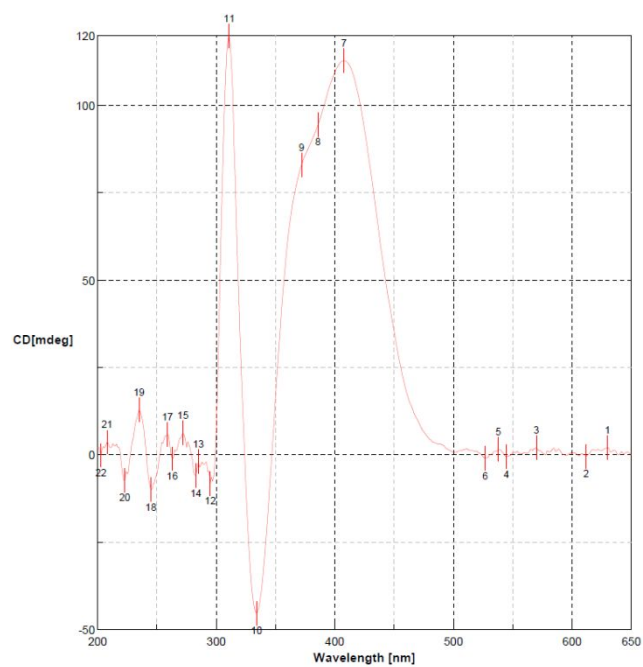

**Figure S20.** CD spectra of  $S_{1r-2}$  ( $5.95 \times 10^{-4}$  M) in  $CH_2Cl_2$ .

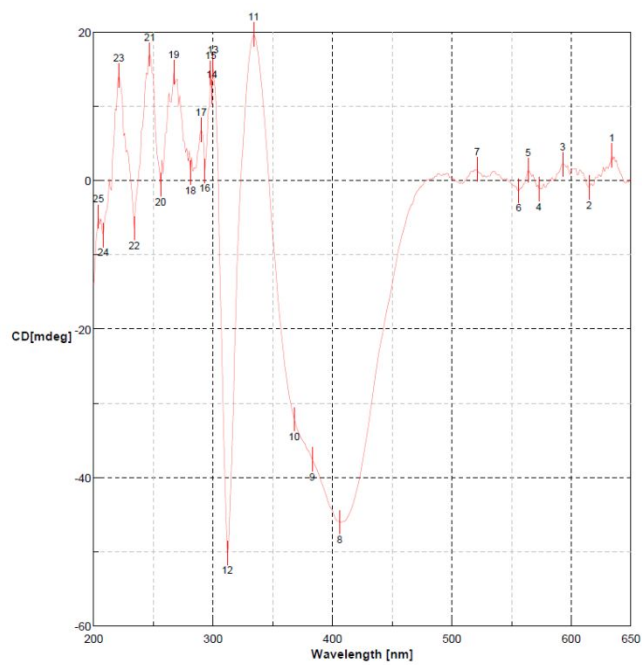

**Figure S21.** CD spectra of  $R_{1r-2}$  ( $3.81 \times 10^{-4}$  M) in  $CH_2Cl_2$ .

## 5. Dehydrogenation reaction of complexes **5** and **6**

In a high-pressure NMR tube, solution of the complex **5** (10.1 mg, 0.011 mmol) and **6** (24.5 mg, 0.024 mmol) in THF- $d_8$  was monitored by NMR. After heating the rhodium sample at 393 K for 30 min, the clean conversion to **3** was about 30 %. A clean conversion of about 50% to **4** was observed after heating the iridium sample at 393 K for 2.5 h.

## 6. Kinetic studies for the H/D exchange at Cp\* of complex 3

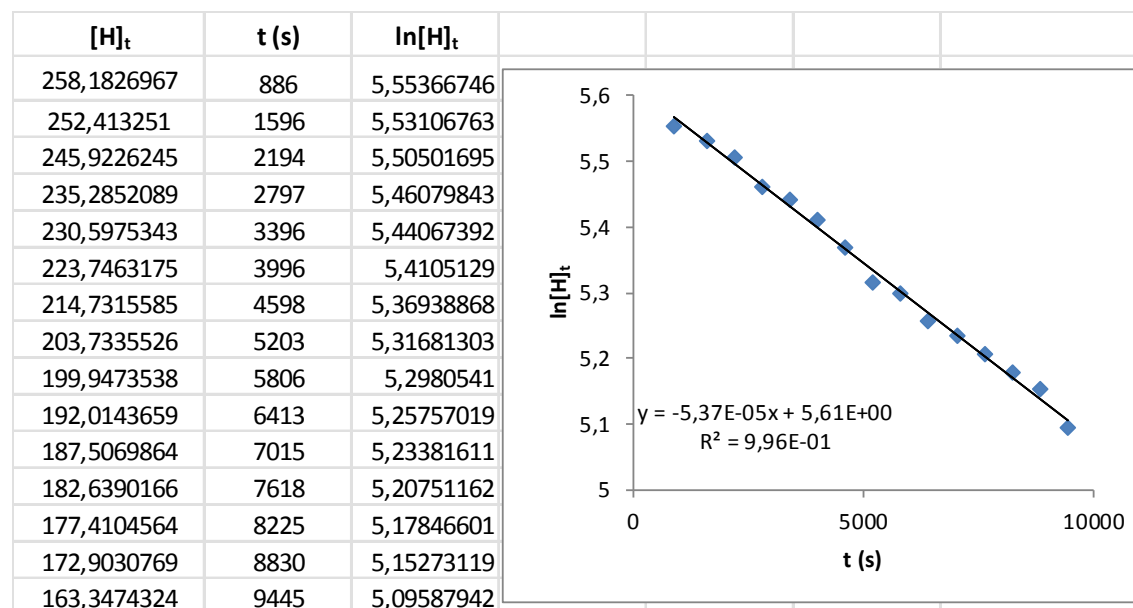

**Figure S22.** Kinetic experiment at 298 K: **3** (18.03 mM) in 0.35/0.10 mL of THF-*d*<sub>8</sub>/CD<sub>3</sub>OD.  $k_{\text{obs}} = 5.37 \pm 0.1 \times 10^{-5} \text{ s}^{-1}$ .

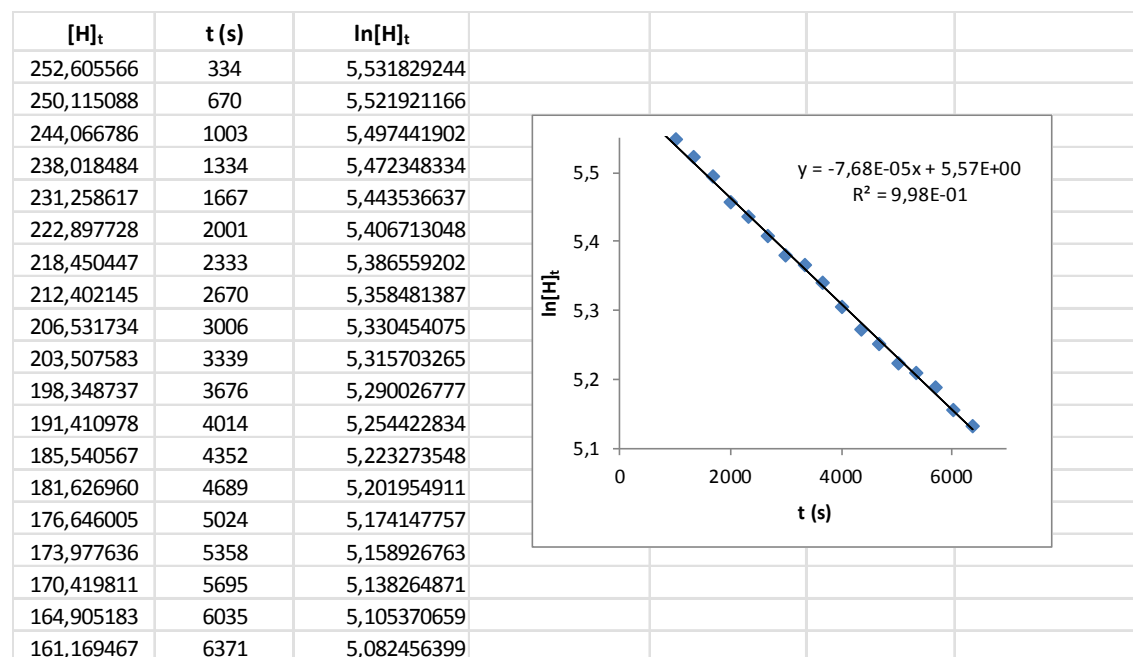

**Figure S23.** Kinetic experiment at 303 K: **3** (17.79 mM) in 0.35/0.10 mL of THF-*d*<sub>8</sub>/CD<sub>3</sub>OD.  $k_{\text{obs}} = 7.68 \pm 0.08 \times 10^{-5} \text{ s}^{-1}$ .

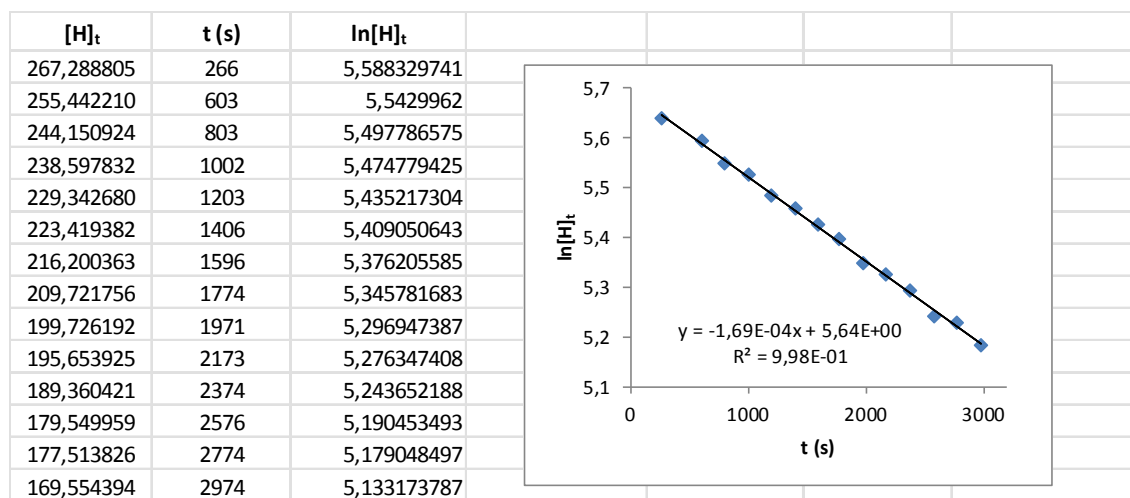

**Figure S24.** Kinetic experiment at 313 K: **3** (18.51 mM) in 0.35/0.10 mL of THF-*d*<sub>8</sub>/CD<sub>3</sub>OD.  $k_{\text{obs}} = 1.69 \pm 0.02 \times 10^{-4} \text{ s}^{-1}$ .

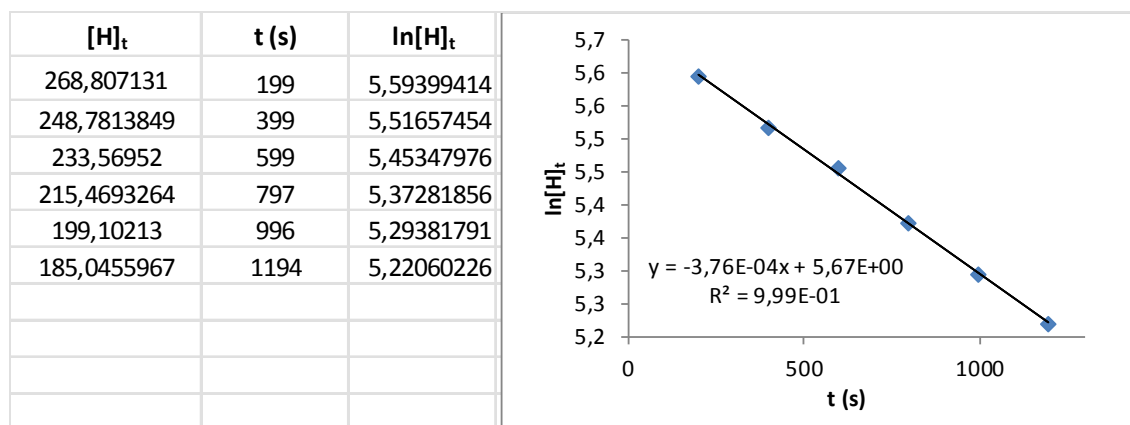

**Figure S25.** Kinetic experiment at 323 K: **3** (19.26 mM) in 0.35/0.10 mL of THF-*d*<sub>8</sub>/CD<sub>3</sub>OD.  $k_{\text{obs}} = 3.76 \pm 0.06 \times 10^{-4} \text{ s}^{-1}$ .



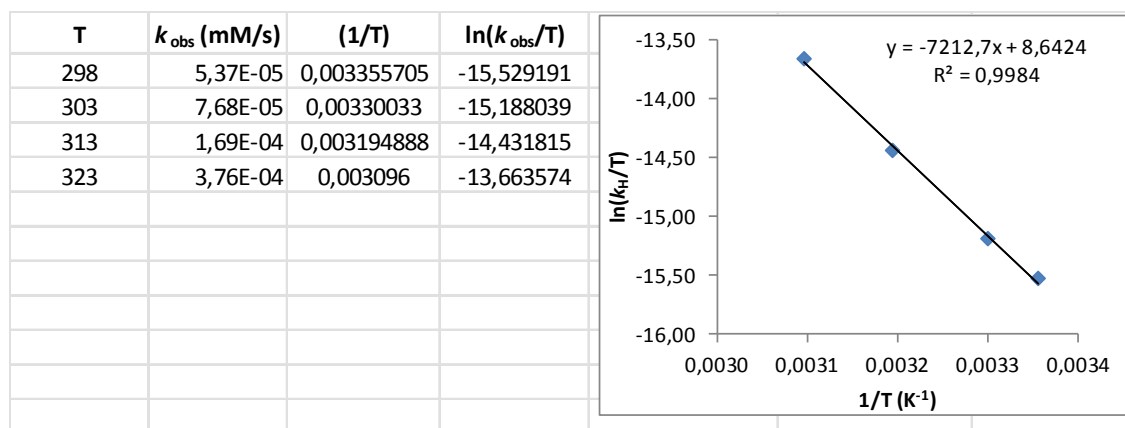

**Figure S26.** Eyring analysis for the H/D exchange at Cp\* of complex **3** with CD<sub>3</sub>OD.  $\Delta G^\ddagger = 23.1 \pm 0.8$  kcal/mol;  $\Delta H^\ddagger = 14.33 \pm 0.40$  kcal/mol;  $\Delta S^\ddagger = -30.04 \pm 1.30$  u.

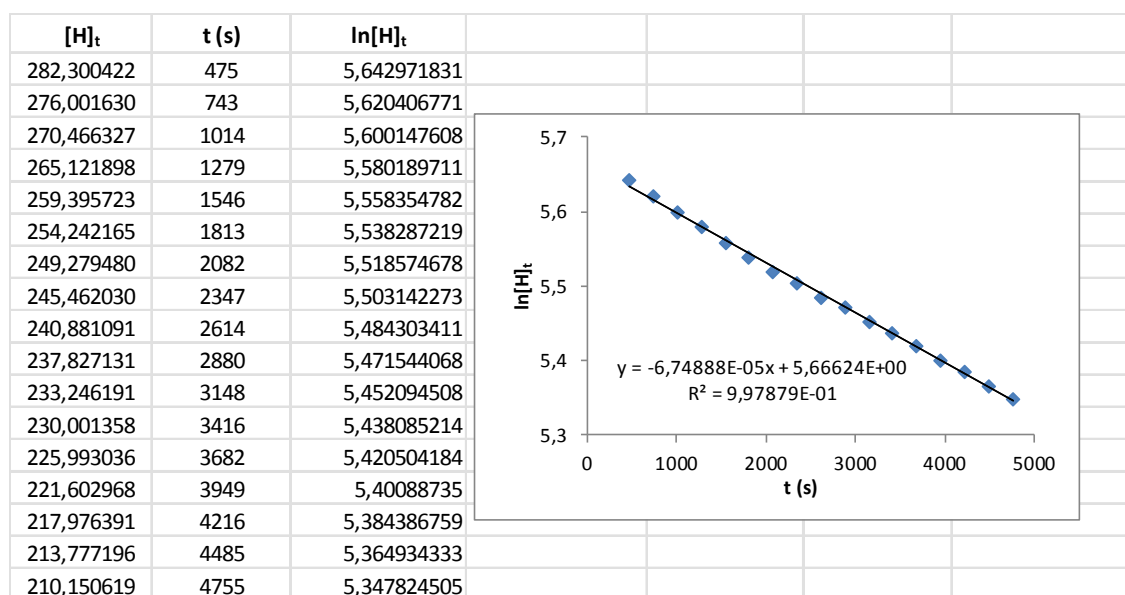

**Figure S27.** Kinetic experiment at 303 K: **3** (19.09 mM) in 0.35/0.10 mL of THF-*d*<sub>8</sub>/CH<sub>3</sub>OD.  $k_{\text{obs}} = 6.75 \pm 0.08 \times 10^{-5} \text{ s}^{-1}$ .

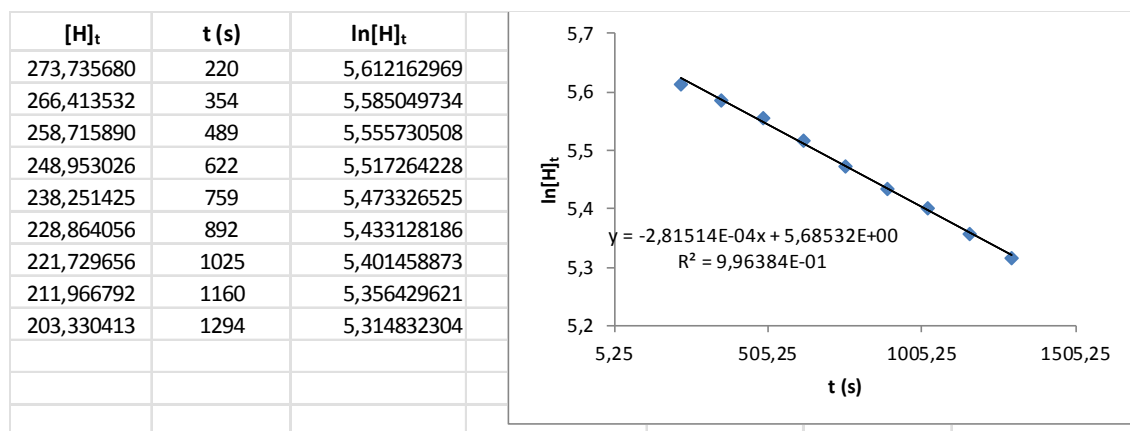

**Figure S28.** Kinetic experiment at 313 K: **3** (18.77 mM) in 0.35/0.10 mL of THF-*d*<sub>8</sub>/CH<sub>3</sub>OD.  $k_{\text{obs}} = 2.82 \pm 0.06 \times 10^{-4} \text{ s}^{-1}$ .

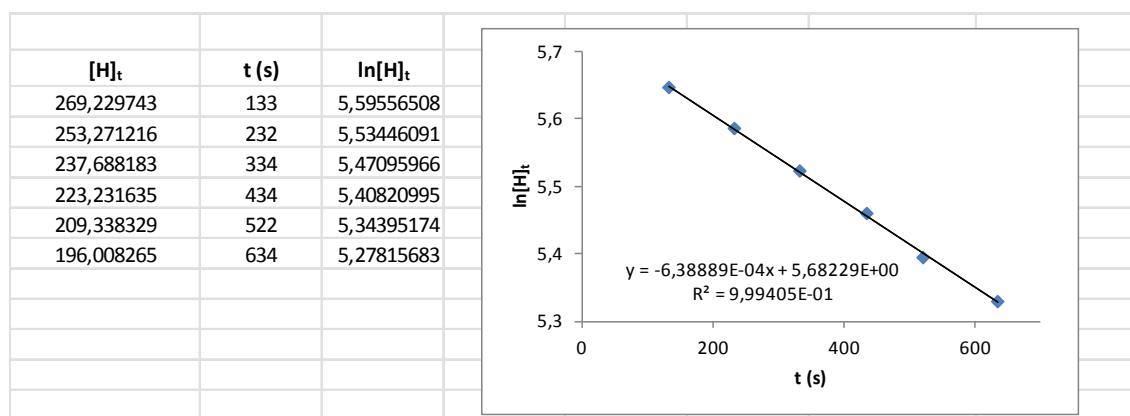

**Figure S29.** Kinetic experiment at 323 K: **3** (18.77 mM) in 0.35/0.10 mL of THF-*d*<sub>8</sub>/CH<sub>3</sub>OD.  $k_{\text{obs}} = 6.39 \pm 0.08 \times 10^{-4} \text{ s}^{-1}$ .

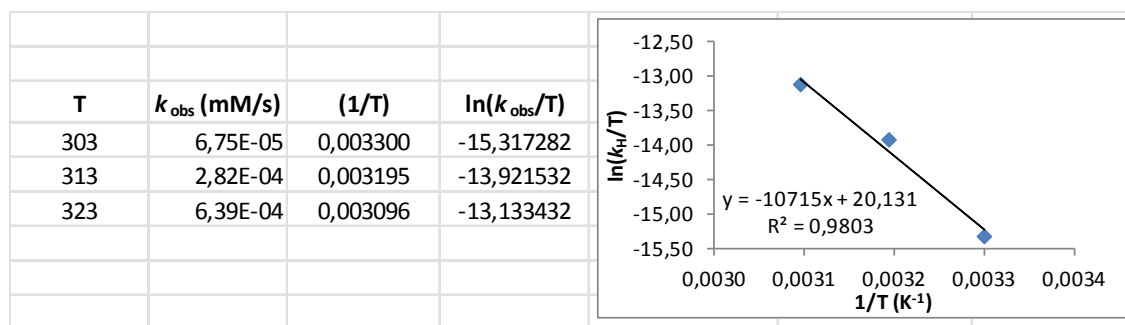

**Figure S30.** Eyring analysis for the H/D exchange at Cp\* of complex **3** with CH<sub>3</sub>OD.  $\Delta G^\ddagger = 23.4 \pm 0.2$  kcal/mol;  $\Delta H^\ddagger = 21 \pm 3$  kcal/mol;  $\Delta S^\ddagger = -7 \pm 9$  cal/K·mol

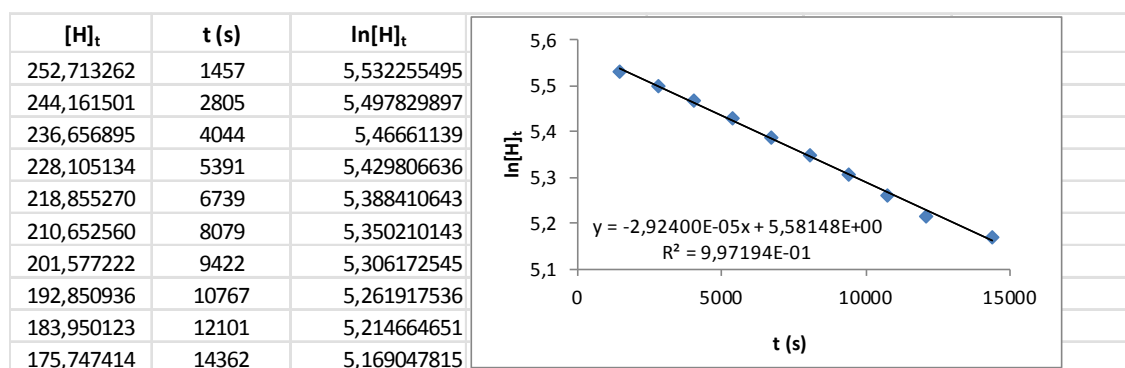

**Figure S31.** Kinetic experiment at 303 K: **3** (17.45 mM) in 0.35/0.10 mL of THF-*d*<sub>8</sub>/EtOD.  $k_{\text{obs}} = 2.92 \pm 0.05 \times 10^{-5} \text{ s}^{-1}$ .

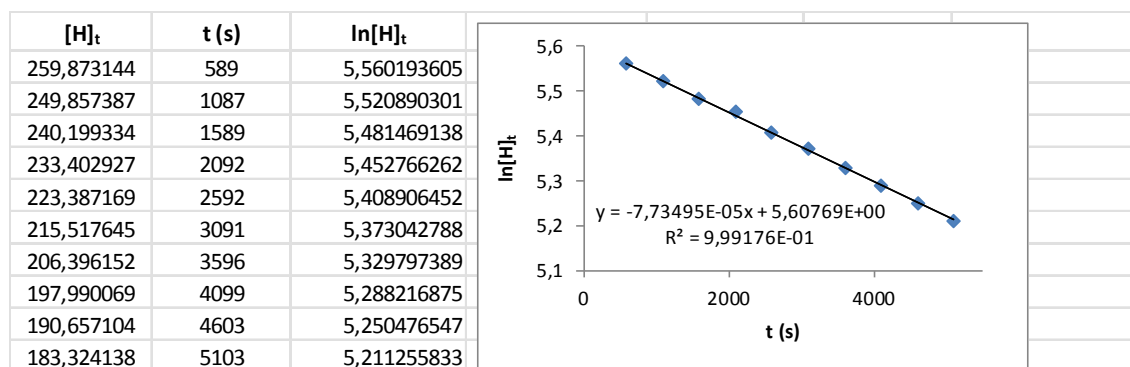

**Figure S32.** Kinetic experiment at 313 K: **3** (17.89 mM) in 0.35/0.10 mL of THF-*d*<sub>8</sub>/EtOD.  $k_{\text{obs}} = 7.73 \pm 0.09 \times 10^{-5} \text{ s}^{-1}$ .

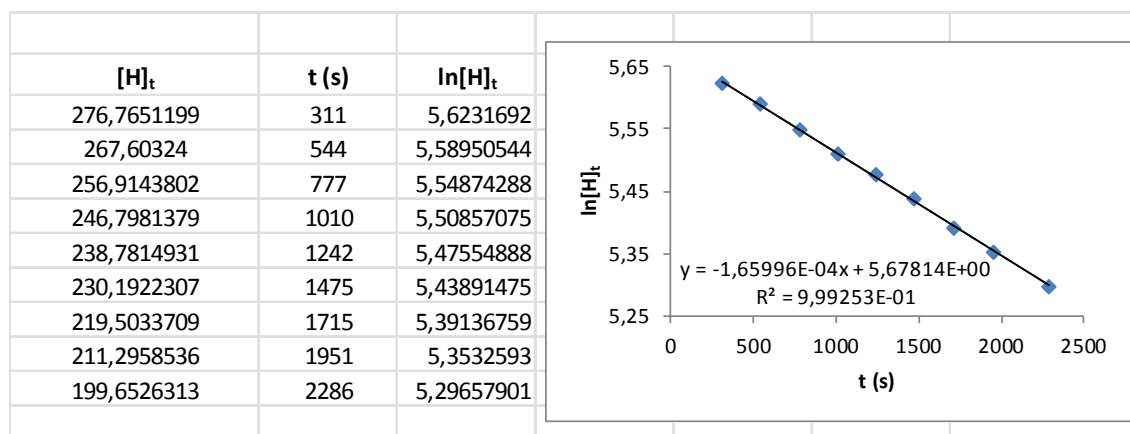

**Figure S33.** Kinetic experiment at 323 K: **3** (19.09 mM) in 0.35/0.10 mL of THF-*d*<sub>8</sub>/EtOD.  $k_{\text{obs}} = 1.66 \pm 0.02 \times 10^{-4} \text{ s}^{-1}$ .

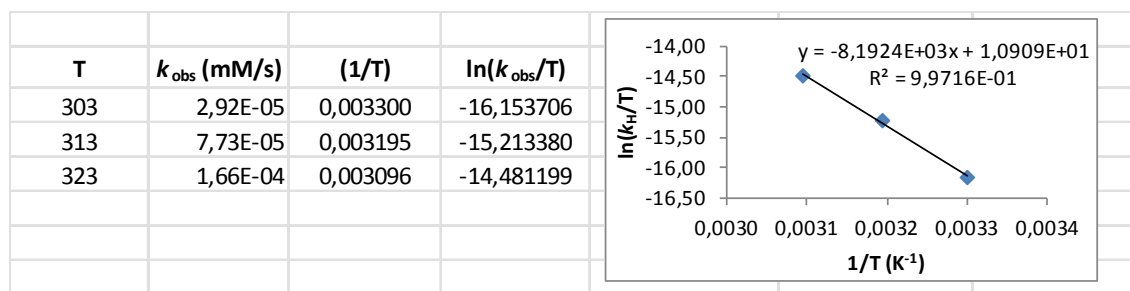

**Figure S34.** Eyring analysis for the H/D exchange at Cp\* of complex **3** with EtOD.  $\Delta G^\ddagger = 23 \pm 2$  kcal/mol;  $\Delta H^\ddagger = 16.3 \pm 0.9$  kcal/mol;  $\Delta S^\ddagger = -26 \pm 3$  cal/K·mol.

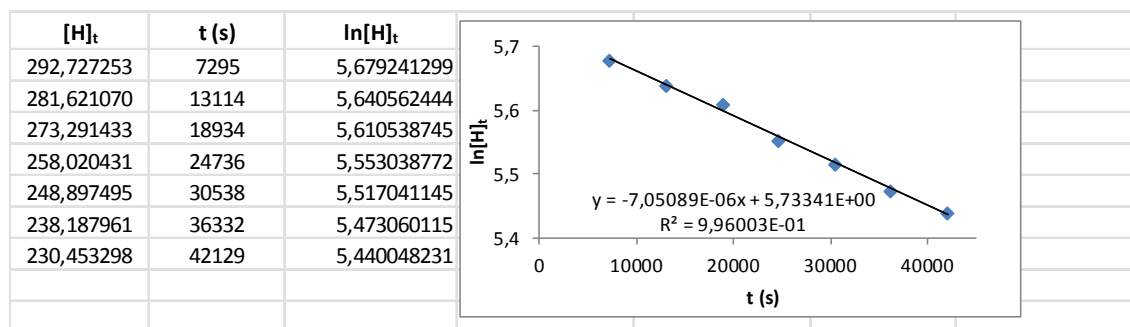

**Figure S35.** Kinetic experiment at 303 K: **3** (19.83 mM) in 0.35/0.10 mL of THF-*d*<sub>8</sub>/*i*PrOD.  $k_{\text{obs}} = 7.1 \pm 0.2 \times 10^{-6} \text{ s}^{-1}$ .

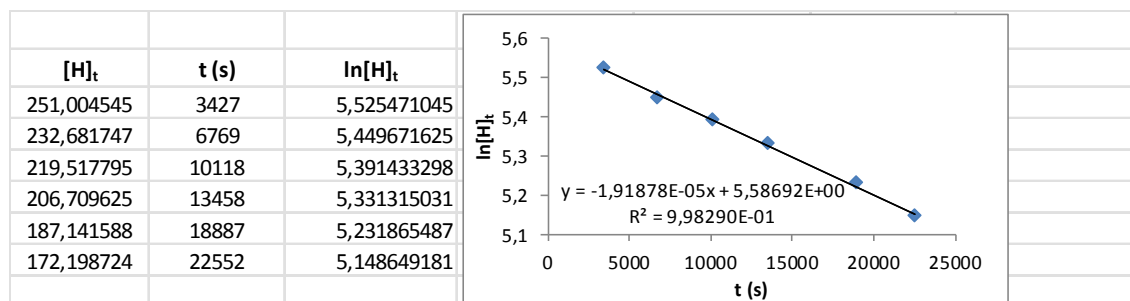

**Figure S36.** Kinetic experiment at 313 K: **3** (17.79 mM) in 0.35/0.10 mL of THF-*d*<sub>8</sub>/*i*PrOD.  $k_{\text{obs}} = 1.92 \pm 0.04 \times 10^{-5} \text{ s}^{-1}$ .

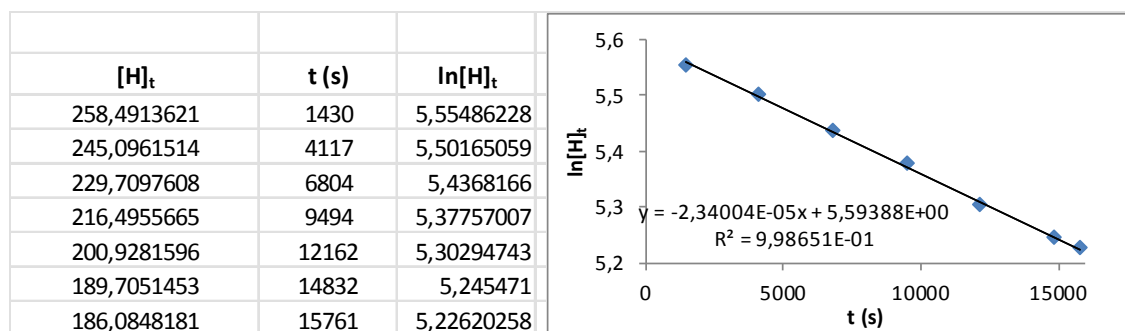

**Figure S37.** Kinetic experiment at 323 K: **3** (18.10 mM) in 0.35/0.10 mL of THF- $d_8$ /*i*PrOD.  $k_{\text{obs}} = 2.34 \pm 0.04 \times 10^{-5} \text{ s}^{-1}$ .

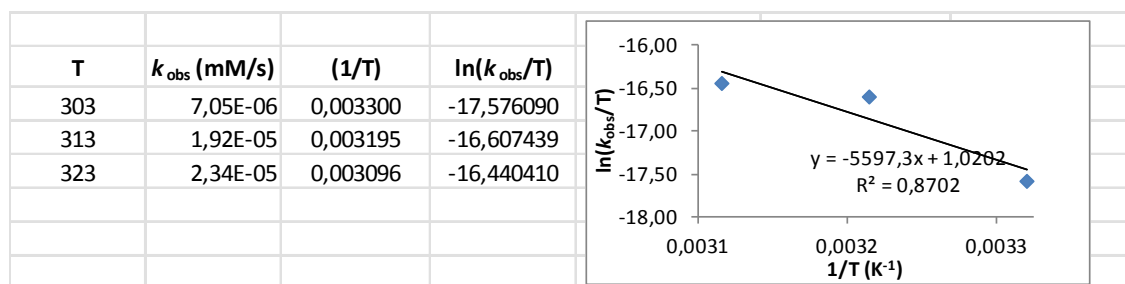

**Figure S38.** Eyring analysis for the H/D exchange at  $\text{Cp}^*$  of complex **3** with *i*PrOD.  $\Delta G^\ddagger = 24 \pm 8$  kcal/mol;  $\Delta H^\ddagger = 11 \pm 4$  kcal/mol;  $\Delta S^\ddagger = -45 \pm 14$  cal/K·mol.

## 7. Kinetic studies for acceptorless alcohol dehydrogenation

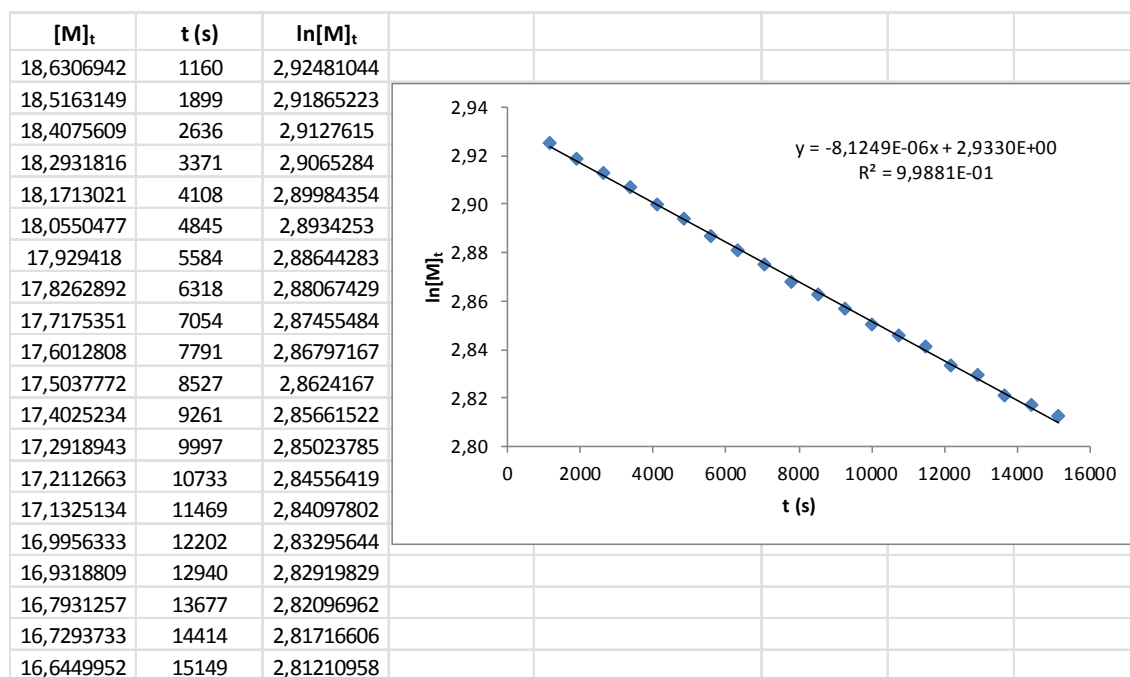

**Figure S39.** Kinetic experiment at 333 K: **3** (7.80 mg; 0.0084 mmol) and CH<sub>3</sub>OH (0.283 mmol) in THF-*d*<sub>8</sub> (0.45 mL).  $k_{\text{obs}} = 8.12 \pm 0.07 \times 10^{-6} \text{ s}^{-1}$ .

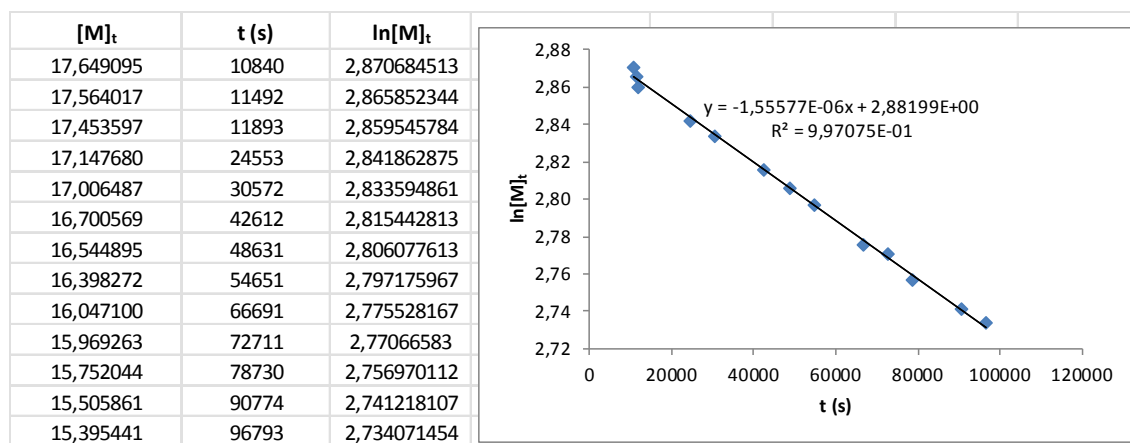

**Figure S40.** Kinetic experiment at 333 K: **3** (7.53 mg; 0.0081 mmol) and CH<sub>3</sub>OD (0.285 mmol) in THF-*d*<sub>8</sub> (0.45 mL).  $k_{\text{obs}} = 1.56 \pm 0.03 \times 10^{-6} \text{ s}^{-1}$ .

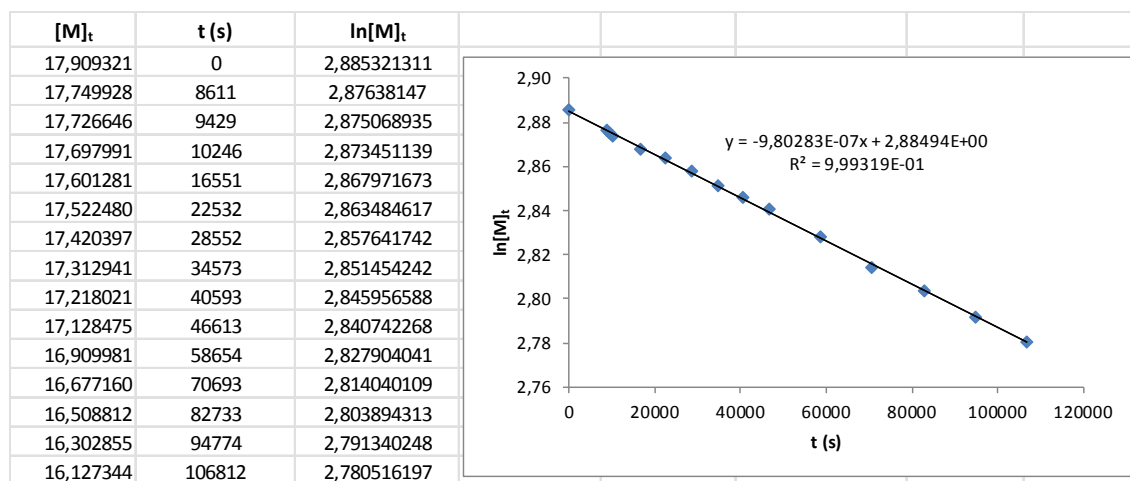

**Figure S41.** Kinetic experiment at 333 K: **3** (7.45 mg; 0.0081 mmol) and CD<sub>3</sub>OH (0.285 mmol) in THF-*d*<sub>8</sub> (0.45 mL).  $k_{\text{obs}} = 9.80 \pm 0.07 \times 10^{-7} \text{ s}^{-1}$ .

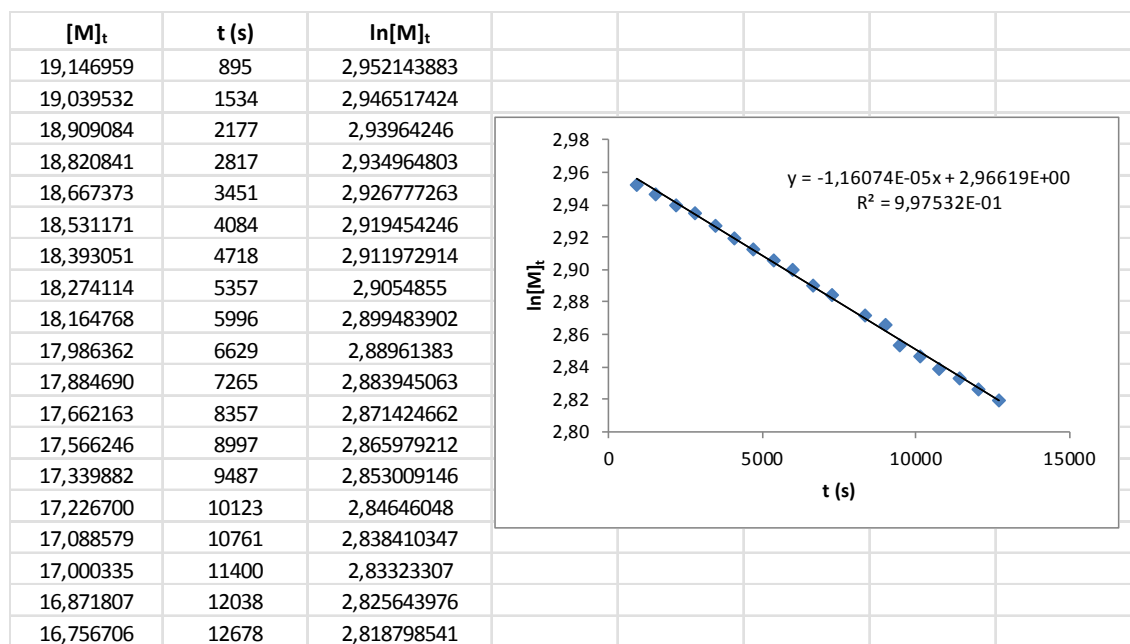

**Figure S42.** Kinetic experiment at 333 K: **3** (7.98 mg; 0.0086 mmol) and EtOH (0.283 mmol) in THF-*d*<sub>8</sub> (0.45 mL).  $k_{\text{obs}} = 1.16 \pm 0.01 \times 10^{-5} \text{ s}^{-1}$ .



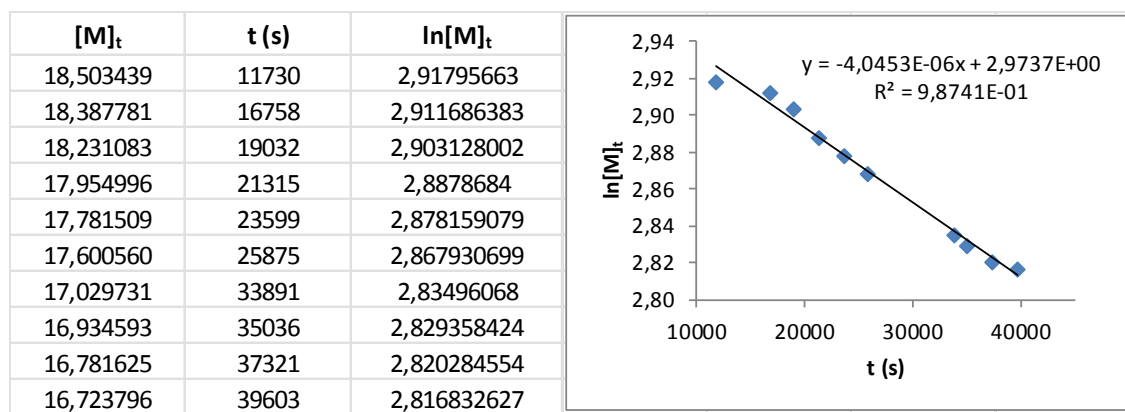

**Figure S43.** Kinetic experiment at 333 K: **3** (7.79 mg; 0.0084 mmol) and *n*PrOH (0.306 mmol) in THF-*d*<sub>8</sub> (0.45 mL).  $k_{\text{obs}} = 4.0 \pm 0.2 \times 10^{-6} \text{ s}^{-1}$ .

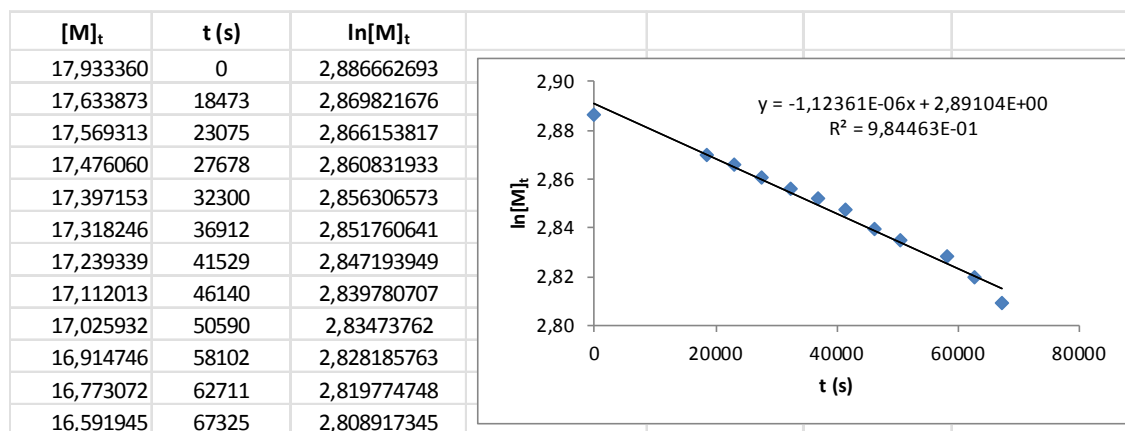

**Figure S44.** Kinetic experiment at 333 K: **3** (7.46 mg; 0.0081 mmol) and *i*PrOH (0.199 mmol) in THF-*d*<sub>8</sub> (0.45 mL).  $k_{\text{obs}} = 1.12 \pm 0.04 \times 10^{-6} \text{ s}^{-1}$ .

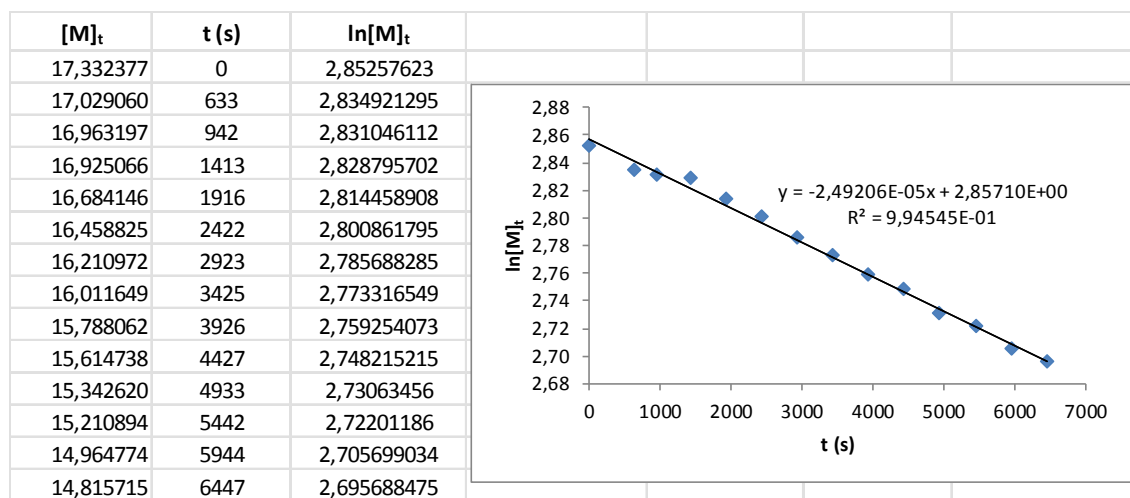

**Figure S45.** Kinetic experiment at 333 K: **3** (7.21 mg; 0.0078 mmol) and BnOH (0.206 mmol) in THF-*d*<sub>8</sub> (0.45 mL).  $k_{\text{obs}} = 2.49 \pm 0.05 \times 10^{-5} \text{ s}^{-1}$ .

## 8. Crystal structure determination of 1, 2, 4, 7, 8a and 8b

X-ray diffraction data were collected on a Smart APEX ( $S_{Rh-1}$ ,  $R_{Ir-2}$ ,  $S_{Ir-2}\cdot CH_2Cl_2$ ,  $rac-2\cdot CH_2Cl_2$ ) or APEX DUO ( $R_{Rh-1}$ ,  $rac-1$ , 4, 7, 8a, 8b) Bruker diffractometers, using graphite-monochromated Mo  $\kappa\alpha$  radiation ( $\lambda = 0.71073 \text{ \AA}$ ). Single crystals were mounted on a fiber or a MiTeGen support, coated with a protecting perfluoropolyether oil and cooled to 100(2) K ( $S_{Rh-1}$ ,  $R_{Ir-2}$ ,  $S_{Ir-2}\cdot CH_2Cl_2$ ,  $rac-2\cdot CH_2Cl_2$ , 4) or 150(2) K ( $R_{Rh-1}$ ,  $rac-1$ ) with an open-flow nitrogen gas. Data were collected using  $\omega$ -scans and  $\varphi$  scans with narrow oscillation frame strategies. Diffracted intensities were integrated and corrected for absorption effects by using multi-scan method using SAINT<sup>[S2]</sup> and SADABS<sup>[S3]</sup> programs, included in APEX2 or APEX4 packages. Structures were solved by Patterson or direct methods with SHELXS<sup>[S4]</sup> and refined by full-matrix least squares on  $F^2$  with SHELXL program<sup>[S5]</sup> included in Wingx program system.<sup>[S6]</sup> Hydrogen atoms have been observed in Fourier difference maps. Most of them have been included in the model in calculated positions and refined with a riding model. The NH hydrogen atoms have been included in observed positions (except for  $rac-1$  and  $rac-2\cdot CH_2Cl_2$  structures), with geometrical restraints concerning N-H bond lengths ( $rac-1$ ). Further details about specific problems encountered in data reduction or structure refinement (disorder or twinning) are described below.

**Structural data for  $R_{Rh-1}$ :**  $C_{39}H_{45}ClF_6N_3PRhSb$ ;  $M_r = 960.86$ ; red prism,  $0.092 \times 0.099 \times 0.112 \text{ mm}^3$ ; orthorhombic  $P2_12_12_1$ ;  $a = 11.9947(7) \text{ \AA}$ ,  $b = 13.1691(7) \text{ \AA}$ ,  $c = 25.9066(15) \text{ \AA}$ ;  $V = 4092.2(4) \text{ \AA}^3$ ,  $Z = 4$ ,  $D_c = 1.560 \text{ g/cm}^3$ ;  $\mu = 1.262 \text{ cm}^{-1}$ ; min. and max. absorption correction factors: 0.7378 and 0.9116,  $2\theta_{max} = 59.240^\circ$ ; 43271 reflections measured, 10747 unique;  $R_{int} = 0.0731$ ; number of data/restraint/parameters 10747/1/478;  $R_1 = 0.0493$  [7471 ref. with  $I > 2\sigma(I)$ ],  $wR(F^2) = 0.1187$  (all data); largest difference peak  $1.075 \text{ e}\cdot\text{\AA}^{-3}$ ; Flack parameter:  $-0.019(15)$ .

**Structural data for  $S_{Rh-1}$ :**  $C_{39}H_{45}ClF_6N_3PRhSb$ ;  $M_r = 960.86$ ; red prism,  $0.290 \times 0.320 \times 0.340 \text{ mm}^3$ ; orthorhombic  $P2_12_12_1$ ;  $a = 11.8200(6) \text{ \AA}$ ,  $b = 13.0631(7) \text{ \AA}$ ,  $c = 25.7405(14) \text{ \AA}$ ;  $V = 3974.5(4) \text{ \AA}^3$ ,  $Z = 4$ ,  $D_c = 1.606 \text{ g/cm}^3$ ;  $\mu = 1.262 \text{ cm}^{-1}$ ; min. and max. absorption correction factors: 0.5840 and 0.7468,

$2\theta_{\max} = 56.374^\circ$ ; 35619 reflections measured, 9235 unique;  $R_{\text{int}} = 0.0365$ ; number of data/restraint/parameters 9235/0/483;  $R_1 = 0.0394$  [8570 ref. with  $I > 2\sigma(I)$ ],  $wR(F^2) = 0.0977$  (all data); largest difference peak  $2.343 \text{ e} \cdot \text{\AA}^{-3}$ ; Flack parameter:  $-0.021(11)$ .

**Structural data for *rac*-1:**  $\text{C}_{39}\text{H}_{45}\text{ClF}_6\text{N}_3\text{PRhSb}$ ;  $M_r = 960.86$ ; orange needle,  $0.085 \times 0.091 \times 0.313 \text{ mm}^3$ ; monoclinic  $Cc$ ;  $a = 12.6541(10) \text{ \AA}$ ,  $b = 24.6742(19) \text{ \AA}$ ,  $c = 13.5627(10) \text{ \AA}$ ;  $\beta = 97.7350(10)^\circ$ ;  $V = 4196.1(6) \text{ \AA}^3$ ,  $Z = 4$ ,  $D_c = 1.521 \text{ g/cm}^3$ ;  $\mu = 1.169 \text{ cm}^{-1}$ ; min. and max. absorption correction factors: 0.6005 and 0.8648,  $2\theta_{\max} = 52.510^\circ$ ; 18121 reflections measured, 6700 unique;  $R_{\text{int}} = 0.0410$ ; number of data/restraint/parameters 6700/3/477;  $R_1 = 0.0532$  [5656 ref. with  $I > 2\sigma(I)$ ],  $wR(F^2) = 0.1436$  (all data); largest difference peak  $0.812 \text{ e} \cdot \text{\AA}^{-3}$ ; Flack parameter:  $-0.02(4)$ .

**Structural data for  $R_{\text{Ir}}\text{-2}$ :**  $\text{C}_{39}\text{H}_{45}\text{ClF}_6\text{IrN}_3\text{PSb}$ ;  $M_r = 1050.15$ ; yellow prism,  $0.080 \times 0.110 \times 0.180 \text{ mm}^3$ ; orthorhombic  $P2_12_12_1$ ;  $a = 11.802(5) \text{ \AA}$ ,  $b = 13.153(5) \text{ \AA}$ ,  $c = 25.7260(12) \text{ \AA}$ ;  $V = 3993(2) \text{ \AA}^3$ ,  $Z = 4$ ,  $D_c = 1.747 \text{ g/cm}^3$ ;  $\mu = 4.172 \text{ cm}^{-1}$ ; min. and max. absorption correction factors: 0.5455 and 0.6876,  $2\theta_{\max} = 57.330^\circ$ ; 48763 reflections measured, 9669 unique;  $R_{\text{int}} = 0.0351$ ; number of data/restraint/parameters 9669/0/476;  $R_1 = 0.0229$  [9044 ref. with  $I > 2\sigma(I)$ ],  $wR(F^2) = 0.0456$  (all data); largest difference peak  $0.821 \text{ e} \cdot \text{\AA}^{-3}$ ; Flack parameter:  $-0.0160(19)$ .

**Structural data for  $S_{\text{Ir}}\text{-2} \cdot \text{CH}_2\text{Cl}_2$ :**  $\text{C}_{39}\text{H}_{45}\text{ClF}_6\text{IrN}_3\text{PSb} \cdot \text{CH}_2\text{Cl}_2$ ;  $M_r = 1135.07$ ; yellow-orange prism,  $0.085 \times 0.150 \times 0.174 \text{ mm}^3$ ; orthorhombic  $P2_12_12_1$ ;  $a = 13.0839(6) \text{ \AA}$ ,  $b = 13.1222(6) \text{ \AA}$ ,  $c = 25.3504(11) \text{ \AA}$ ;  $V = 4952.4(3) \text{ \AA}^3$ ,  $Z = 4$ ,  $D_c = 1.732 \text{ g/cm}^3$ ;  $\mu = 3.954 \text{ cm}^{-1}$ ; min. and max. absorption correction factors: 0.5371 and 0.6789,  $2\theta_{\max} = 57.522^\circ$ ; 53697 reflections measured, 10564 unique;  $R_{\text{int}} = 0.0309$ ; number of data/restraint/parameters 10564/0/511;  $R_1 = 0.0219$  [10114 ref. with  $I > 2\sigma(I)$ ],  $wR(F^2) = 0.0520$  (all data); largest difference peak  $2.033 \text{ e} \cdot \text{\AA}^{-3}$ ; Flack parameter:  $-0.0147(17)$ .

**Structural data for *rac*-2  $\cdot \text{CH}_2\text{Cl}_2$ :**  $\text{C}_{39}\text{H}_{45}\text{ClF}_6\text{IrN}_3\text{PSb} \cdot 2(\text{CH}_2\text{Cl}_2)$ ;  $M_r = 1220.0$ ; yellow needle,  $0.100 \times 0.130 \times 0.300 \text{ mm}^3$ ; monoclinic  $P2_1/c$ ;  $a = 23.6453(12) \text{ \AA}$ ,  $b = 13.5492(7) \text{ \AA}$ ,  $c = 29.2459(15) \text{ \AA}$ ;  $\beta =$

100.2780(10) °;  $V = 9219.3(8) \text{ \AA}^3$ ,  $Z = 8$ ,  $D_c = 1.758 \text{ g/cm}^3$ ;  $\mu = 3.852 \text{ cm}^{-1}$ ; min. and max. absorption correction factors: 0.4080 and 0.6119,  $2\theta_{\text{max}} = 56.830^\circ$ ; 168457 reflections measured, 22511 unique;  $R_{\text{int}} = 0.0695$ ; number of data/restraint/parameters 22511/0/978;  $R_1 = 0.0585$  [17676 ref. with  $I > 2\sigma(I)$ ],  $wR(F^2) = 0.1488$  (all data); largest difference peak  $3.146 \text{ e} \cdot \text{\AA}^{-3}$ . Asymmetric unit of **rac-2·CH<sub>2</sub>Cl<sub>2</sub>** contains two iridium cation, two SbF<sub>6</sub> counterions and dichloromethane solvent. Interpretation of residual density peaks as solvent allows to locate three CH<sub>2</sub>Cl<sub>2</sub> molecules. Model refinement is not stable for two of them, leading to unrealistic geometrical parameters. The solvent contribution to the diffracted intensities have been analysed with SQUEEZE program.<sup>[S7]</sup>

**Structural data for 4·C<sub>4</sub>H<sub>8</sub>O:** C<sub>39</sub>H<sub>44</sub>F<sub>6</sub>IrN<sub>3</sub>PSb·C<sub>4</sub>H<sub>8</sub>O;  $M_r = 1085.79$ ; yellow prism,  $0.195 \times 0.265 \times 0.360 \text{ mm}^3$ ; triclinic  $P\bar{1}$ ;  $a = 12.8032(6) \text{ \AA}$ ,  $b = 13.8442(6) \text{ \AA}$ ,  $c = 24.3349(11) \text{ \AA}$ ;  $\alpha = 101.3316(8)^\circ$ ,  $\beta = 92.1614(7)^\circ$ ,  $\gamma = 90.7380(6)^\circ$ ;  $V = 4225.4(3) \text{ \AA}^3$ ,  $Z = 4$ ,  $D_c = 1.707 \text{ g/cm}^3$ ;  $\mu = 3.887 \text{ cm}^{-1}$ ; min. and max. absorption correction factors: 0.5118 and 0.7457,  $2\theta_{\text{max}} = 56.572^\circ$ ; 51788 reflections measured, 35651 unique;  $R_{\text{int}} = 0.0347$ ; number of data/restraint/parameters 35651/0/1032;  $R_1 = 0.0295$  [32420 ref. with  $I > 2\sigma(I)$ ],  $wR(F^2) = 0.0880$  (all data); largest difference peak  $2.574 \text{ e} \cdot \text{\AA}^{-3}$ . The sample crystallizes in transparent yellow prismatic crystals. In spite of their well-defined shape and transparency, all the tested crystals have been found to be twinned. Collected data have been refined as a 2-component twin. Both domains have been identified with CELL NOW<sup>[S8]</sup> and they have been found to be related by a 180 degree rotation around [1 0 0] axis. Diffraction data have been corrected for absorption with TWINABS.<sup>[S8]</sup> Both domains contributions have been taken into account and single and composite reflections have been used in the structure refinement.

**Structural data for 7:** C<sub>39</sub>H<sub>44</sub>F<sub>6</sub>N<sub>3</sub>PRhSb;  $M_r = 924.40$ ; yellow prism,  $0.280 \times 0.120 \times 0.020 \text{ mm}^3$ ; monoclinic  $P2_1/c$ ;  $a = 19.910(4) \text{ \AA}$ ,  $b = 8.8909(17) \text{ \AA}$ ,  $c = 23.234(4) \text{ \AA}$ ,  $\beta = 112.681(3)^\circ$ ;  $V = 3794(13) \text{ \AA}^3$ ,  $Z = 4$ ,  $D_c = 1.618 \text{ g/cm}^3$ ;  $\mu = 1.250 \text{ cm}^{-1}$ ; min. and max. absorption correction factors: 0.7086 and 0.8826;  $2\theta_{\text{max}} = 52.74^\circ$ ; 26826 reflections measured, 7743 unique;  $R_{\text{int}} = 0.0951$ ; number of

data/restraint/parameters 7743/2/477;  $R_1 = 0.0501$  [ $I > 2\sigma(I)$ ],  $wR(F^2) = 0.1376$  (all data); largest difference peak  $1.876 \text{ e}\cdot\text{\AA}^{-3}$ .

**Structural data for 8a:**  $\text{C}_{39}\text{H}_{44}\text{F}_6\text{IrN}_3\text{PSb}$ ;  $M_r = 1013.69$ ; yellow prism,  $0.200 \times 0.120 \times 0.100 \text{ mm}^3$ ; monoclinic  $P2_1/c$ ;  $a = 19.905(2) \text{ \AA}$ ,  $b = 9.0017(9) \text{ \AA}$ ,  $c = 23.224(2) \text{ \AA}$ ,  $\beta = 112.5420(10)^\circ$ ;  $V = 3843.2(7) \text{ \AA}^3$ ,  $Z = 4$ ,  $D_c = 1.752 \text{ g/cm}^3$ ;  $\mu = 4.265 \text{ cm}^{-1}$ ; min. and max. absorption correction factors: 0.4859 and 0.5481;  $2\theta_{\text{max}} = 56.63^\circ$ ; 51322 reflections measured, 9545 unique;  $R_{\text{int}} = 0.0366$ ; number of data/restraint/parameters 9545/2/479;  $R_1 = 0.0318$  [ $I > 2\sigma(I)$ ],  $wR(F^2) = 0.0831$  (all data); largest difference peak  $2.988 \text{ e}\cdot\text{\AA}^{-3}$ .

**Structural data for 8b:**  $\text{C}_{39}\text{H}_{44}\text{F}_6\text{IrN}_3\text{PSb}$ ;  $M_r = 1013.69$ ; yellow prism,  $0.200 \times 0.160 \times 0.040 \text{ mm}^3$ ; monoclinic  $P2_1/c$ ;  $a = 15.2688(13) \text{ \AA}$ ,  $b = 18.2608(16) \text{ \AA}$ ,  $c = 14.9258(13) \text{ \AA}$ ,  $\beta = 116.1320(10)^\circ$ ;  $V = 3736.2(6) \text{ \AA}^3$ ,  $Z = 4$ ,  $D_c = 1.802 \text{ g/cm}^3$ ;  $\mu = 4.387 \text{ cm}^{-1}$ ; min. and max. absorption correction factors: 0.4470 and 0.6035;  $2\theta_{\text{max}} = 56.58^\circ$ ; 39673 reflections measured, 9263 unique;  $R_{\text{int}} = 0.0525$ ; number of data/restraint/parameters 9263/2/475;  $R_1 = 0.0280$  [ $I > 2\sigma(I)$ ],  $wR(F^2) = 0.0642$  (all data); largest difference peak  $1.322 \text{ e}\cdot\text{\AA}^{-3}$ .

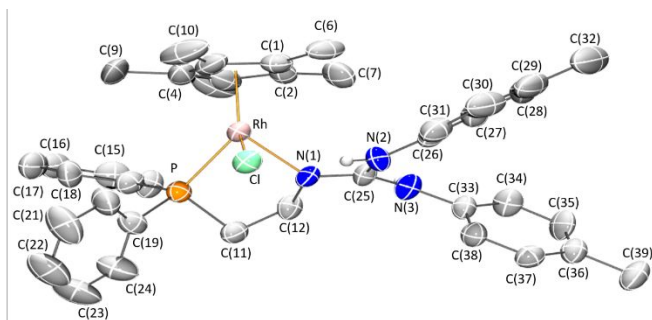

**Figure S46.** View of the cation of the  $R_{\text{Rh}}$  enantiomer of the rhodium complex  $[\text{Cp}^*\text{RhCl}(\kappa^2\text{N},\text{P}\text{-}\text{H}_2\text{L})][\text{SbF}_6]$  (**1**) in *rac*-**1**.

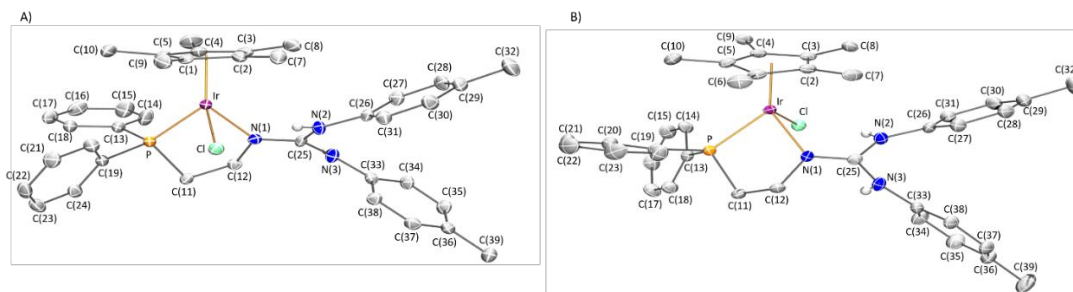

**Figure S47.** View of the cations of the  $R_{Ir}$  (A) and  $S_{Ir}$  (B) enantiomers of the iridium complex  $[\text{Cp}^*\text{IrCl}(\kappa^2\text{N},\text{P}-\text{H}_2\text{L})][\text{SbF}_6]$  (**2**) in  $S_{Ir}\text{-2}$  and  $R_{Ir}\text{-2}\cdot\text{CH}_2\text{Cl}_2$  crystals.

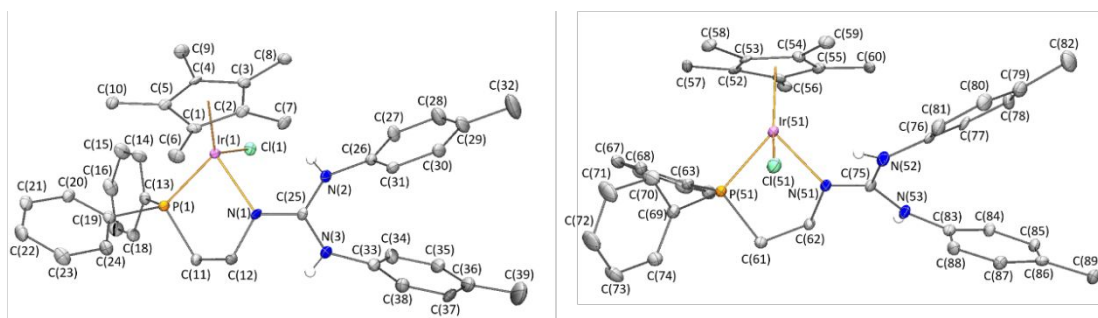

**Figure S48.** View of both independent cations of the asymmetric unit of the iridium complex  $[\text{Cp}^*\text{IrCl}(\kappa^2\text{N},\text{P}-\text{H}_2\text{L})][\text{SbF}_6]$  (**1**) in  $rac\text{-2}$ . They correspond to  $S_{Ir(1)}$  and  $R_{Ir(51)}$ . As the crystal is found to be centrosymmetric, the corresponding  $R_{Ir(1)}$  and  $S_{Ir(51)}$  are also present in the unit cell.

**Table S1.** Selected Bonds Lengths (Å) and Angles (°) for complex  $R_{Rh}\text{-1}$ ,  $rac\text{-1}$ ,  $R_{Ir}\text{-2}$ ,  $S_{Ir}\text{-2}\cdot\text{CH}_2\text{Cl}_2$  and  $rac\text{-2}\cdot\text{CH}_2\text{Cl}_2$ .

|                                    | $R_{Rh}\text{-1}$ | $rac\text{-1}$ | $R_{Ir}\text{-2}$ | $S_{Ir}\text{-2}\cdot\text{CH}_2\text{Cl}_2$ | $rac\text{-2}\cdot\text{CH}_2\text{Cl}_2$ |                      |
|------------------------------------|-------------------|----------------|-------------------|----------------------------------------------|-------------------------------------------|----------------------|
|                                    |                   |                |                   |                                              | <b>A<sup>c</sup></b>                      | <b>B<sup>c</sup></b> |
| M-Cl                               | 2.4264(18)        | 2.424(2)       | 2.4254(12)        | 2.4243(10)                                   | 2.4254(18)                                | 2.428(2)             |
| M-P                                | 2.2990(19)        | 2.322(3)       | 2.2831(13)        | 2.2919(12)                                   | 2.2848(18)                                | 2.2831(19)           |
| M-N(1)                             | 2.133(6)          | 2.130(8)       | 2.126(4)          | 2.115(4)                                     | 2.124(5)                                  | 2.132(6)             |
| M-Ct <sup>a</sup>                  | 1.8308(1)         | 1.8370(1)      | 1.834(2)          | 1.830(5)                                     | 1.836(3)                                  | 1.838(3)             |
| N(1)-C(25)                         | 1.303(8)          | 1.318(13)      | 1.317(6)          | 1.320(6)                                     | 1.325(9)                                  | 1.315(9)             |
| N(2)-C(25)                         | 1.341(9)          | 1.353(12)      | 1.344(6)          | 1.351(6)                                     | 1.342(9)                                  | 1.350(10)            |
| N(3)-C(25)                         | 1.370(8)          | 1.338(13)      | 1.366(6)          | 1.366(6)                                     | 1.361(9)                                  | 1.372(9)             |
| Cl-M-P                             | 90.40(7)          | 92.25(9)       | 89.60(5)          | 87.44(4)                                     | 89.64(6)                                  | 88.70(7)             |
| Cl-M-N(1)                          | 85.40(17)         | 90.9(2)        | 83.69(12)         | 86.64(11)                                    | 86.41(18)                                 | 85.69(18)            |
| Cl-M-Ct <sup>a</sup>               | 121.9(2)          | 121.41(1)      | 122.28(8)         | 122.67(16)                                   | 122.09(13)                                | 123.16(13)           |
| P-M-N(1)                           | 83.12(15)         | 81.3(2)        | 82.97(11)         | 82.31(10)                                    | 82.27(17)                                 | 82.52(17)            |
| P-M-Ct <sup>a</sup>                | 130.6(2)          | 132.38(1)      | 131.52(8)         | 133.79(17)                                   | 132.87(12)                                | 132.94(13)           |
| N(1)-M-Ct <sup>a</sup>             | 131.0(2)          | 125.92(1)      | 131.39(13)        | 128.43(19)                                   | 128.86(18)                                | 128.66(18)           |
| M-N(1)-C(12)                       | 117.6(4)          | 115.6(6)       | 118.2(3)          | 117.3(3)                                     | 117.0(4)                                  | 116.5(4)             |
| M-N(1)-C(25)                       | 122.9(5)          | 124.3(7)       | 123.2(3)          | 124.3(3)                                     | 124.3(5)                                  | 123.5(5)             |
| C(12)-N(1)-C(25)                   | 119.2(6)          | 119.7(9)       | 118.4(4)          | 118.3(4)                                     | 118.7(6)                                  | 120.0(6)             |
| $\Sigma^\circ\text{N}(1)^\text{b}$ | 359.7(9)          | 359.6(13)      | 359.8(6)          | 359.9(6)                                     | 360.0(9)                                  | 360.0(9)             |

M =Rh (1) and Ir (2); <sup>a</sup> Ct represents the centroid of the  $\eta^5$ -C<sub>5</sub>Me<sub>5</sub> ligand. <sup>b</sup>  $\Sigma^\circ$ N(1) is the sum of bond angles around the N(1) atom. <sup>c</sup> Asymmetric unit of *rac*-2·CH<sub>2</sub>Cl<sub>2</sub> contains two independent molecules.

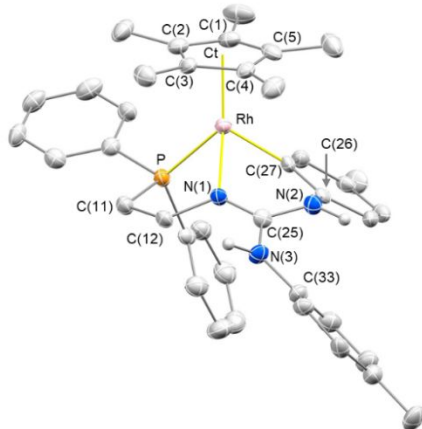

**Figure S49.** ORTEP plot of the cation of compound **7**. Thermal ellipsoids are at 50 % probability and most hydrogen atoms have been omitted for clarity.

**Table S2.** Selected Bonds Lengths (Å) and Angles (°) for **7**.

|            |            |                                  |            |
|------------|------------|----------------------------------|------------|
| Rh-Ct*     | 1.8510(6)  | Ct-Rh-C(27)                      | 125.60(17) |
| Rh-P       | 2.2664(18) | P-Rh-N(1)                        | 77.27(15)  |
| Rh-N(1)    | 2.071(5)   | P-Rh-C(27)                       | 91.59(18)  |
| Rh-C(27)   | 2.053(6)   | N(1)-Rh-C(27)                    | 85.3(2)    |
| N(1)-C(25) | 1.304(8)   | Rh-N(1)-C(12)                    | 117.8(4)   |
| N(2)-C(25) | 1.362(8)   | Rh-N(1)-C(25)                    | 121.6(4)   |
| N(3)-C(25) | 1.363(8)   | C(12)-N(1)-C(25)                 | 120.2(5)   |
| Ct-Rh-P    | 133.55(5)  | $\Sigma^\circ$ N(1) <sup>b</sup> | 359.6(7)   |
| Ct-Rh-N(1) | 126.64(15) | N(1)-C(25)-N(3)-C(33)            | 157.3(6)   |

<sup>a</sup> Ct, centroid of the C(1)–C(2)–C(3)–C(4)–C(5) ring. <sup>b</sup> $\Sigma^\circ$ N(1) is the sum of bond angles around the N(1) atom



## 9. DFT calculations

Molecular structure optimizations and frequency calculations were carried out with the Gaussian09 program (revision D.01)<sup>[S9]</sup> using the method wB97XD.<sup>[S10]</sup> The def2-SVP<sup>[S11]</sup> basis and pseudo potential were used for all atoms and the “ultrafine” grid was employed in all calculations. Stationary points were characterized by vibrational analysis. The structures were optimized in dichloromethane (298 K, 1 atm) using the SMD method.<sup>[S12]</sup> In order to improve the accuracy of the calculated energies, single point energy calculations were carried out on the optimized structures of intermediates and transition states using the method wB97XD,<sup>[S10]</sup> the def2-TZVP<sup>[S11]</sup> basis and pseudo potentials, where appropriate, and the SMD model<sup>[S12]</sup> for the solvent (dichloromethane). Finally, a correction of +1.89 kcal·mol<sup>-1</sup> to Gibbs free energy was also applied for the change of the standard state from gas phase (1 atm) to solution (1 M) at 298 K.<sup>[S13]</sup>

## 10. Energies and coordinates of calculated structures

**Table S3.** Energies (Hartree) of the calculated structures (298 K, 1 atm, if not stated otherwise).

|                                                         | <b>E_dz<sup>a</sup></b> | <b>G_dz<sup>b</sup></b> | <b>E_tz<sup>c</sup></b> | <b>G_tz<sup>d</sup></b> |
|---------------------------------------------------------|-------------------------|-------------------------|-------------------------|-------------------------|
| <b>3</b>                                                | -2127.042073            | -2126.372546            | -2128.944564            | -2128.275037            |
| <b>3 (333 K)</b>                                        | -2127.042073            | -2126.387021            | -2128.944564            | -2128.289511            |
| <b>3·H<sub>2</sub>O</b>                                 | -2203.397308            | -2202.708317            | -2205.392437            | -2204.703446            |
| <b>3·MeOH</b>                                           | -2242.654835            | -2241.940354            | -2244.689829            | -2243.975348            |
| <b>4</b>                                                | -2120.887653            | -2120.218755            | -2122.779324            | -2122.110426            |
| <b>4 (333 K)</b>                                        | -2120.887653            | -2120.233334            | -2122.779324            | -2122.125005            |
| <b>4·H<sub>2</sub>O</b>                                 | -2197.243419            | -2196.555708            | -2199.227582            | -2198.539871            |
| <b>4·MeOH</b>                                           | -2236.501024            | -2235.785664            | -2238.525102            | -2237.809742            |
| <b>5</b>                                                | -2128.255008            | -2127.566095            | -2130.159219            | -2129.470306            |
| <b>5·CH<sub>2</sub>O</b>                                | -2242.646051            | -2241.929570            | -2244.682391            | -2243.965910            |
| <b>6</b>                                                | -2122.104235            | -2121.415017            | -2123.998654            | -2123.309436            |
| <b>6·CH<sub>2</sub>O</b>                                | -2236.496154            | -2235.780668            | -2238.522589            | -2237.807103            |
| <b>7a</b>                                               | -2127.053379            | -2126.382775            | -2128.952763            | -2128.282159            |
| <b>7b</b>                                               | -2127.051181            | -2126.379968            | -2128.951076            | -2128.279863            |
| <b>8a</b>                                               | -2120.901525            | -2120.229637            | -2122.790127            | -2122.118239            |
| <b>8b</b>                                               | -2120.899639            | -2120.228952            | -2122.788787            | -2122.118100            |
| <b>CH<sub>2</sub>O</b>                                  | -114.379369             | -114.374013             | -114.515663             | -114.510307             |
| <b>H<sub>2</sub>O</b>                                   | -76.343172              | -76.339320              | -76.444355              | -76.440503              |
| <b>I<sup>Ir</sup></b>                                   | -2120.870043            | -2120.202708            | -2122.763070            | -2122.095735            |
| <b>I<sup>Ir</sup>·H<sub>2</sub>O</b>                    | -2197.237030            | -2196.549030            | -2199.222197            | -2198.534197            |
| <b>I<sup>Ir</sup>·MeOH</b>                              | -2236.497338            | -2235.779488            | -2238.521051            | -2237.803201            |
| <b>I<sup>Rh</sup></b>                                   | -2127.019603            | -2126.352571            | -2128.924417            | -2128.257385            |
| <b>I<sup>Rh</sup>·H<sub>2</sub>O</b>                    | -2203.386675            | -2202.696522            | -2205.382615            | -2204.692462            |
| <b>I<sup>Rh</sup>·MeOH</b>                              | -2242.646266            | -2241.928865            | -2244.681944            | -2243.964543            |
| <b>II<sup>Ir</sup></b>                                  | -2197.254252            | -2196.559150            | -2199.236047            | -2198.540945            |
| <b>II<sup>Rh</sup></b>                                  | -2203.410577            | -2202.715293            | -2205.403349            | -2204.708065            |
| <b>III<sup>Ir</sup></b>                                 | -2197.231891            | -2196.538604            | -2199.212478            | -2198.519191            |
| <b>III<sup>Rh</sup></b>                                 | -2203.393406            | -2202.703106            | -2205.388058            | -2204.697758            |
| <b>IV<sup>Ir</sup></b>                                  | -2236.510215            | -2235.787196            | -2238.530839            | -2237.807820            |
| <b>IV<sup>Rh</sup></b>                                  | -2242.666632            | -2241.944188            | -2244.698090            | -2243.975646            |
| <b>MeOH</b>                                             | -115.600166             | -115.571326             | -115.739061             | -115.710221             |
| <b>MeOH (333 K)</b>                                     | -115.600166             | -115.574510             | -115.739061             | -115.713405             |
| <b>TS_III<sup>Ir</sup>-III<sup>Ir</sup></b>             | -2197.212791            | -2196.521748            | -2199.191234            | -2198.500191            |
| <b>TS_II<sup>Ir</sup>·MeOH-6·CH<sub>2</sub>O</b>        | -2236.474834            | -2235.756630            | -2238.496819            | -2237.778615            |
| <b>TS_I<sup>Ir</sup>·MeOH-6·CH<sub>2</sub>O (333 K)</b> | -2236.474834            | -2235.771361            | -2238.496819            | -2237.793346            |
| <b>TS_II<sup>Rh</sup>-III<sup>Rh</sup></b>              | -2203.376985            | -2202.685547            | -2205.367545            | -2204.676107            |
| <b>TS_I<sup>Rh</sup>·MeOH-5·CH<sub>2</sub>O</b>         | -2242.630320            | -2241.912518            | -2244.663799            | -2243.945997            |
| <b>TS_I<sup>Rh</sup>·MeOH-5·CH<sub>2</sub>O (333 K)</b> | -2242.630320            | -2241.927273            | -2244.663799            | -2243.960752            |
| <b>TS_IV<sup>Ir</sup>-V<sup>Ir</sup></b>                | -2236.471174            | -2235.753423            | -2238.489089            | -2237.771338            |
| <b>TS_IV<sup>Rh</sup>-V<sup>Rh</sup></b>                | -2242.635224            | -2241.917995            | -2244.665132            | -2243.947903            |
| <b>V<sup>Ir</sup></b>                                   | -2236.488816            | -2235.772776            | -2238.508975            | -2237.792935            |
| <b>V<sup>Rh</sup></b>                                   | -2242.650968            | -2241.934266            | -2244.684243            | -2243.967541            |

<sup>a</sup> E\_dz: energy at the wB97XB/def2svp level (SMD); <sup>b</sup> G\_dz: Gibbs free energy at the wB97XB/def2svp level (SMD); <sup>c</sup> E\_tz: energy at the wB97XB/def2tzvp level (SMD); <sup>d</sup> G\_tz = Gdz-E\_dz+E\_tz (SMD).

## 3

|    |             |             |             |
|----|-------------|-------------|-------------|
| Rh | 0.63434200  | 0.06903300  | -1.03136000 |
| P  | 1.51155600  | -0.77403300 | 0.97355200  |
| N  | -0.92348700 | -1.23362900 | -0.45597600 |
| N  | -1.04785000 | 0.92422500  | -0.04925500 |
| N  | -2.81396700 | -0.40161000 | 0.79049700  |
| C  | 1.99694000  | -0.57464100 | -2.59351000 |
| C  | 0.70485500  | -0.34588500 | -3.18819900 |
| C  | 0.34941000  | 1.01798400  | -2.97956100 |
| C  | 1.44968500  | 1.66200200  | -2.28011800 |
| C  | 2.46993900  | 0.69248200  | -2.07364100 |
| C  | 2.79924400  | -1.82855400 | -2.72013100 |
| H  | 2.17729100  | -2.72376500 | -2.58194500 |
| H  | 3.61429400  | -1.86337900 | -1.98695200 |
| H  | 3.24647600  | -1.88556400 | -3.72586200 |
| C  | -0.11623000 | -1.37827000 | -3.88486600 |
| H  | -1.18717700 | -1.14087700 | -3.84163500 |
| H  | 0.03460000  | -2.37296700 | -3.44421000 |
| H  | 0.17739100  | -1.43248800 | -4.94553400 |
| C  | -0.89129400 | 1.70009700  | -3.45438800 |
| H  | -0.73958600 | 2.10066600  | -4.46959100 |
| H  | -1.16142400 | 2.53995100  | -2.80019900 |
| H  | -1.74277300 | 1.00706500  | -3.48956000 |
| C  | 1.51734700  | 3.11270500  | -1.93360800 |
| H  | 2.23784100  | 3.30229200  | -1.12635400 |
| H  | 0.53764400  | 3.49657500  | -1.61758400 |
| H  | 1.83589500  | 3.69383800  | -2.81412100 |
| C  | 3.83351600  | 0.95646200  | -1.52643800 |
| H  | 4.49744600  | 1.26898600  | -2.34856300 |
| H  | 4.27021000  | 0.05974100  | -1.07041100 |
| H  | 3.82655300  | 1.76133200  | -0.77929900 |
| C  | 1.80534700  | 0.42566000  | 2.30948300  |
| C  | 2.15996100  | 1.73500100  | 1.96684600  |
| H  | 2.21342300  | 2.02162200  | 0.91308800  |
| C  | 2.43680000  | 2.67158800  | 2.96196900  |
| H  | 2.71127900  | 3.69233800  | 2.68693900  |
| C  | 2.35236500  | 2.30435700  | 4.30439800  |
| H  | 2.56121400  | 3.03844500  | 5.08585000  |
| C  | 2.00125900  | 0.99855900  | 4.65147700  |
| H  | 1.93815500  | 0.70973600  | 5.70290100  |
| C  | 1.73484300  | 0.05756900  | 3.65895000  |
| H  | 1.47490200  | -0.96559700 | 3.94175300  |
| C  | 3.06527000  | -1.73302800 | 0.89085000  |
| C  | 4.29103100  | -1.15190700 | 1.23883400  |
| H  | 4.33075900  | -0.12442100 | 1.60668600  |
| C  | 5.47369500  | -1.88119200 | 1.12213800  |
| H  | 6.42314500  | -1.41634700 | 1.39677200  |
| C  | 5.44393200  | -3.19792400 | 0.66454400  |
| H  | 6.37110700  | -3.76871000 | 0.57710400  |
| C  | 4.22521500  | -3.78593200 | 0.32540200  |
| H  | 4.19317900  | -4.81854800 | -0.02877700 |
| C  | 3.04255400  | -3.05779000 | 0.43380000  |
| H  | 2.10068900  | -3.53342900 | 0.15301600  |
| C  | 0.22999700  | -1.97125900 | 1.56546700  |
| H  | 0.68678600  | -2.81877400 | 2.09631200  |
| H  | -0.40309300 | -1.42870400 | 2.28524200  |
| C  | -0.61522000 | -2.39978400 | 0.35934000  |
| H  | -0.06849900 | -3.11558100 | -0.27144200 |
| H  | -1.52362300 | -2.91628200 | 0.70890500  |

|   |             |             |             |
|---|-------------|-------------|-------------|
| C | -1.65465600 | -0.23898000 | 0.09312200  |
| C | -1.62889100 | 2.19406700  | 0.07034200  |
| C | -0.92177700 | 3.22221400  | 0.70681100  |
| H | 0.05755500  | 3.00377800  | 1.13375700  |
| C | -1.45881500 | 4.50264000  | 0.79496200  |
| H | -0.88585600 | 5.28724600  | 1.29737400  |
| C | -2.71818600 | 4.80540400  | 0.25968400  |
| C | -3.41608400 | 3.77314100  | -0.37825500 |
| H | -4.39593800 | 3.97812500  | -0.81845800 |
| C | -2.88458700 | 2.48931300  | -0.48192400 |
| H | -3.44419600 | 1.71132200  | -1.00584000 |
| C | -3.30328900 | 6.18601400  | 0.39122900  |
| H | -4.12832200 | 6.34387700  | -0.31811600 |
| H | -2.54479100 | 6.96334100  | 0.21428600  |
| H | -3.70345400 | 6.34842500  | 1.40572800  |
| C | -3.76553300 | -1.43610700 | 0.71429200  |
| C | -4.70723900 | -1.53494300 | 1.74595900  |
| H | -4.66462500 | -0.83158700 | 2.58159800  |
| C | -5.69500700 | -2.51405000 | 1.70878200  |
| H | -6.42079500 | -2.56420500 | 2.52508100  |
| C | -5.77409900 | -3.43252200 | 0.65488400  |
| C | -4.82746500 | -3.31858100 | -0.36983000 |
| H | -4.86320000 | -4.01285400 | -1.21399700 |
| C | -3.83714900 | -2.33893500 | -0.35354000 |
| H | -3.11902000 | -2.28156100 | -1.17197200 |
| C | -6.81547600 | -4.51950600 | 0.64101000  |
| H | -6.43933500 | -5.43114100 | 1.13440900  |
| H | -7.09565800 | -4.79544900 | -0.38618700 |
| H | -7.72617900 | -4.21096900 | 1.17484800  |
| H | -3.09512100 | 0.40077400  | 1.34664600  |

### 3 · H<sub>2</sub>O

|    |             |             |             |
|----|-------------|-------------|-------------|
| Rh | 0.53939100  | -0.15348500 | -1.04774400 |
| P  | 1.29456100  | -1.05144500 | 0.99529800  |
| N  | -1.17914800 | -1.21178100 | -0.44992300 |
| N  | -0.98418700 | 0.94116000  | -0.07169500 |
| N  | -2.91514300 | -0.09669600 | 0.80549200  |
| C  | 2.02743500  | -0.87434600 | -2.47517700 |
| C  | 0.73816300  | -0.87393100 | -3.09900200 |
| C  | 0.23802600  | 0.47033900  | -3.10415700 |
| C  | 1.25414800  | 1.31401500  | -2.51278600 |
| C  | 2.34840700  | 0.49452300  | -2.11411900 |
| C  | 2.97228300  | -2.02926500 | -2.42853300 |
| H  | 2.44607300  | -2.98176300 | -2.28405700 |
| H  | 3.71451300  | -1.92064700 | -1.62798100 |
| H  | 3.51741300  | -2.08930800 | -3.38471500 |
| C  | 0.03143000  | -2.06811500 | -3.64709500 |
| H  | -1.05561800 | -1.98568400 | -3.51385800 |
| H  | 0.37063200  | -2.99230100 | -3.16071900 |
| H  | 0.23538400  | -2.15991400 | -4.72603400 |
| C  | -1.04352100 | 0.93808100  | -3.71303800 |
| H  | -0.89877100 | 1.17566300  | -4.77921700 |
| H  | -1.41356500 | 1.84464600  | -3.21494100 |
| H  | -1.82405900 | 0.16779400  | -3.64375800 |
| C  | 1.16577500  | 2.79808000  | -2.38831500 |
| H  | 1.80986900  | 3.17494300  | -1.58465300 |
| H  | 0.13624300  | 3.12783500  | -2.19302500 |
| H  | 1.49121600  | 3.26253200  | -3.33342900 |

|   |             |             |             |
|---|-------------|-------------|-------------|
| C | 3.65612600  | 0.95937600  | -1.55905100 |
| H | 4.37764200  | 1.10232800  | -2.38024200 |
| H | 4.08519200  | 0.21878800  | -0.87021800 |
| H | 3.55571700  | 1.91476900  | -1.02591500 |
| C | 1.71734300  | 0.09443900  | 2.34628100  |
| C | 2.28604900  | 1.33092600  | 2.02347800  |
| H | 2.42419900  | 1.61707900  | 0.97854200  |
| C | 2.67926100  | 2.21074400  | 3.03168800  |
| H | 3.12315300  | 3.16917400  | 2.75522500  |
| C | 2.49629900  | 1.86108500  | 4.36872900  |
| H | 2.79835900  | 2.55011100  | 5.16088200  |
| C | 1.92938600  | 0.62807600  | 4.69707100  |
| H | 1.78865900  | 0.35135900  | 5.74430800  |
| C | 1.54654200  | -0.25753400 | 3.69160000  |
| H | 1.11869100  | -1.22594400 | 3.96255300  |
| C | 2.72899800  | -2.17818400 | 0.92005600  |
| C | 4.02148600  | -1.69915200 | 1.16834400  |
| H | 4.17698100  | -0.66496600 | 1.48360400  |
| C | 5.12281100  | -2.54126900 | 1.02124800  |
| H | 6.12614500  | -2.15706000 | 1.21776500  |
| C | 4.94435700  | -3.86862900 | 0.63202600  |
| H | 5.80817300  | -4.52763400 | 0.51990500  |
| C | 3.65874000  | -4.35373600 | 0.39352800  |
| H | 3.51136800  | -5.39349300 | 0.09328600  |
| C | 2.55627000  | -3.51279800 | 0.53153400  |
| H | 1.55900800  | -3.90719800 | 0.32402200  |
| C | -0.13004500 | -2.08088200 | 1.57941400  |
| H | 0.21153700  | -2.97814700 | 2.11525500  |
| H | -0.69264200 | -1.46240200 | 2.29615200  |
| C | -1.02357800 | -2.40196000 | 0.37466900  |
| H | -0.57208600 | -3.18538100 | -0.25110000 |
| H | -1.99215300 | -2.79396900 | 0.72531100  |
| C | -1.75248600 | -0.11660500 | 0.09820300  |
| C | -1.36635600 | 2.28543500  | 0.02773600  |
| C | -0.57220100 | 3.18519100  | 0.74777700  |
| H | 0.30836300  | 2.80649000  | 1.26938800  |
| C | -0.90673400 | 4.53577100  | 0.80344600  |
| H | -0.27317200 | 5.21933800  | 1.37635000  |
| C | -2.04180700 | 5.03407600  | 0.15037600  |
| C | -2.83297400 | 4.12410600  | -0.56263800 |
| H | -3.72357800 | 4.48180000  | -1.08690800 |
| C | -2.50456700 | 2.77218400  | -0.63170000 |
| H | -3.12918200 | 2.08528700  | -1.20758700 |
| C | -2.41860500 | 6.48853300  | 0.23965200  |
| H | -2.92256900 | 6.83053100  | -0.67611000 |
| H | -1.53700900 | 7.12413500  | 0.40670400  |
| H | -3.11242400 | 6.66352200  | 1.07867500  |
| C | -3.99174800 | -1.00343800 | 0.75310500  |
| C | -4.87827800 | -1.04052800 | 1.83445800  |
| H | -4.70269200 | -0.39205300 | 2.69660800  |
| C | -5.97907500 | -1.89258800 | 1.81283100  |
| H | -6.66148500 | -1.89822000 | 2.66710900  |
| C | -6.22413500 | -2.74082000 | 0.72699800  |
| C | -5.32744600 | -2.69010500 | -0.34806300 |
| H | -5.49583400 | -3.33093300 | -1.21813400 |
| C | -4.22924200 | -1.83454600 | -0.34856100 |
| H | -3.55198600 | -1.81221000 | -1.20367200 |
| C | -7.39322700 | -3.68898300 | 0.72002000  |
| H | -7.08298600 | -4.70092300 | 1.02941500  |

|   |             |             |             |
|---|-------------|-------------|-------------|
| H | -7.83299500 | -3.77742600 | -0.28454500 |
| H | -8.18177100 | -3.36038000 | 1.41212000  |
| H | -3.07462700 | 0.74246400  | 1.35555800  |
| O | 3.04523600  | 3.97240600  | 0.31194700  |
| H | 3.38927300  | 4.64075900  | -0.29286800 |
| H | 2.12399000  | 4.23168900  | 0.43906100  |

### 3 · MeOH

|    |             |             |             |
|----|-------------|-------------|-------------|
| Rh | 0.42595800  | -0.36215400 | -1.01710500 |
| P  | 1.11395300  | -1.31635800 | 1.02069800  |
| N  | -1.39359000 | -1.19684100 | -0.36671100 |
| N  | -0.93037600 | 0.92007400  | -0.02497400 |
| N  | -2.97036200 | 0.14619500  | 0.87806200  |
| C  | 1.83837500  | -1.22937300 | -2.45186200 |
| C  | 0.54052500  | -1.15358100 | -3.05097200 |
| C  | 0.13799700  | 0.22486700  | -3.08677900 |
| C  | 1.22076400  | 1.00668300  | -2.53416100 |
| C  | 2.25919000  | 0.12048400  | -2.12508600 |
| C  | 2.70268100  | -2.44475600 | -2.39221300 |
| H  | 2.11563700  | -3.35840000 | -2.23418700 |
| H  | 3.45536300  | -2.37598800 | -1.59708800 |
| H  | 3.23730000  | -2.55194300 | -3.35022200 |
| C  | -0.26135800 | -2.30515900 | -3.55880200 |
| H  | -1.33572500 | -2.14588700 | -3.39492600 |
| H  | 0.02823600  | -3.24379300 | -3.06792600 |
| H  | -0.09788700 | -2.42622100 | -4.64172100 |
| C  | -1.11981100 | 0.76336200  | -3.68685000 |
| H  | -0.99901000 | 0.90761800  | -4.77249100 |
| H  | -1.38459200 | 1.73463500  | -3.24795000 |
| H  | -1.96350100 | 0.07675700  | -3.53143600 |
| C  | 1.24494200  | 2.49414000  | -2.42818400 |
| H  | 1.83288800  | 2.81921800  | -1.56114900 |
| H  | 0.23314100  | 2.91142900  | -2.33887200 |
| H  | 1.70662200  | 2.91829900  | -3.33452300 |
| C  | 3.60062500  | 0.50873600  | -1.59130800 |
| H  | 4.32831800  | 0.57413400  | -2.41679900 |
| H  | 3.97818000  | -0.23506100 | -0.87587800 |
| H  | 3.56658700  | 1.48560600  | -1.08948000 |
| C  | 1.69242000  | -0.20789600 | 2.34326400  |
| C  | 2.34296500  | 0.97886200  | 1.99192900  |
| H  | 2.45670100  | 1.25756600  | 0.94189700  |
| C  | 2.84401400  | 1.82646500  | 2.97985400  |
| H  | 3.34035800  | 2.75090700  | 2.67836100  |
| C  | 2.69196300  | 1.49242200  | 4.32449000  |
| H  | 3.07852100  | 2.15714100  | 5.10058800  |
| C  | 2.04465800  | 0.30745800  | 4.68128300  |
| H  | 1.92654700  | 0.04333700  | 5.73456600  |
| C  | 1.55073100  | -0.54487900 | 3.69601300  |
| H  | 1.05616600  | -1.47515600 | 3.98699100  |
| C  | 2.40842100  | -2.59940200 | 0.93362100  |
| C  | 3.74934100  | -2.27550800 | 1.17626400  |
| H  | 4.02587600  | -1.26757000 | 1.49456200  |
| C  | 4.74355500  | -3.24000200 | 1.01789700  |
| H  | 5.78616400  | -2.97723100 | 1.21003600  |
| C  | 4.40844900  | -4.53504500 | 0.62294300  |
| H  | 5.18854000  | -5.29007100 | 0.50243600  |
| C  | 3.07357100  | -4.86494500 | 0.38908800  |
| H  | 2.80399000  | -5.87840900 | 0.08381200  |

|   |             |             |             |
|---|-------------|-------------|-------------|
| C | 2.07791100  | -3.90165600 | 0.53844000  |
| H | 1.03983200  | -4.17323100 | 0.33370600  |
| C | -0.40837300 | -2.16620100 | 1.65123300  |
| H | -0.15972700 | -3.09604500 | 2.18285200  |
| H | -0.87054400 | -1.48344000 | 2.38140100  |
| C | -1.37038200 | -2.38421000 | 0.47566400  |
| H | -1.04367600 | -3.23119700 | -0.14531600 |
| H | -2.37195700 | -2.63919400 | 0.86004700  |
| C | -1.82103400 | -0.03143700 | 0.16874800  |
| C | -1.14186900 | 2.30365700  | 0.06414800  |
| C | -0.28572300 | 3.09169200  | 0.84266000  |
| H | 0.50027500  | 2.60200800  | 1.41928000  |
| C | -0.43971200 | 4.47454300  | 0.88477300  |
| H | 0.23922000  | 5.06918600  | 1.50414500  |
| C | -1.45433400 | 5.11801500  | 0.16202000  |
| C | -2.31321900 | 4.31930700  | -0.60234100 |
| H | -3.11469100 | 4.79036600  | -1.17814100 |
| C | -2.16257300 | 2.93472400  | -0.65918800 |
| H | -2.83371800 | 2.33714000  | -1.27989900 |
| C | -1.63470700 | 6.61018100  | 0.23923800  |
| H | -2.16777100 | 6.99739000  | -0.64088700 |
| H | -0.66774900 | 7.12928600  | 0.31358400  |
| H | -2.22260100 | 6.88779000  | 1.12980200  |
| C | -4.17643600 | -0.57554800 | 0.78690700  |
| C | -5.13433600 | -0.38778600 | 1.79090700  |
| H | -4.91739600 | 0.28673800  | 2.62334900  |
| C | -6.35763400 | -1.04749300 | 1.72946400  |
| H | -7.09004100 | -0.87967000 | 2.52386400  |
| C | -6.66539200 | -1.92056900 | 0.67844300  |
| C | -5.69845300 | -2.09422800 | -0.31826800 |
| H | -5.90931800 | -2.75919600 | -1.16047900 |
| C | -4.47255700 | -1.43355800 | -0.27856400 |
| H | -3.74470700 | -1.58239300 | -1.07707000 |
| C | -7.97400500 | -2.66333900 | 0.63863000  |
| H | -7.91330900 | -3.60125700 | 1.21535400  |
| H | -8.25381000 | -2.92947700 | -0.39101600 |
| H | -8.78921200 | -2.06613800 | 1.07291000  |
| H | -3.02397900 | 1.01985700  | 1.39441700  |
| O | 3.09113700  | 3.61711000  | 0.25240900  |
| H | 2.20007000  | 3.97337800  | 0.34685400  |
| C | 3.86879700  | 4.53509000  | -0.48083800 |
| H | 4.88025800  | 4.11605900  | -0.57811800 |
| H | 3.47126400  | 4.70488000  | -1.49765900 |
| H | 3.95275000  | 5.51098200  | 0.02877400  |

#### 4

|   |             |             |             |
|---|-------------|-------------|-------------|
| P | 1.46920900  | -0.79189100 | 1.09198500  |
| N | -0.97747900 | -1.25832100 | -0.29810500 |
| N | -1.09090600 | 0.88900200  | 0.09844100  |
| N | -2.87412700 | -0.42023600 | 0.94100400  |
| C | 1.92530600  | -0.61072700 | -2.53524500 |
| C | 0.62023600  | -0.35686000 | -3.09952800 |
| C | 0.29223500  | 1.01560900  | -2.88873800 |
| C | 1.41501100  | 1.63814300  | -2.20009200 |
| C | 2.42396800  | 0.64687800  | -2.01622400 |
| C | 2.71012500  | -1.87277700 | -2.69572500 |
| H | 2.07496100  | -2.76131800 | -2.57586800 |
| H | 3.52388800  | -1.93646200 | -1.96261300 |
| H | 3.15701800  | -1.91337900 | -3.70225800 |

|   |             |             |             |
|---|-------------|-------------|-------------|
| C | -0.23357200 | -1.37768700 | -3.77489700 |
| H | -1.29829700 | -1.11709300 | -3.71457000 |
| H | -0.09570800 | -2.37052100 | -3.32542400 |
| H | 0.04059900  | -1.44839800 | -4.83955700 |
| C | -0.94241900 | 1.72016000  | -3.34923200 |
| H | -0.79779000 | 2.11889500  | -4.36605700 |
| H | -1.18949700 | 2.56339400  | -2.69021000 |
| H | -1.80667600 | 1.04246900  | -3.37187000 |
| C | 1.52517800  | 3.09064300  | -1.86861100 |
| H | 2.24581700  | 3.26528200  | -1.05790200 |
| H | 0.55576700  | 3.50589800  | -1.56091000 |
| H | 1.86726400  | 3.65360800  | -2.75200100 |
| C | 3.79878600  | 0.88770300  | -1.48526500 |
| H | 4.45690800  | 1.20137500  | -2.31137100 |
| H | 4.22791500  | -0.01966300 | -1.04322400 |
| H | 3.80870100  | 1.68325500  | -0.72814600 |
| C | 1.78059900  | 0.40366900  | 2.42884900  |
| C | 2.13751300  | 1.71325400  | 2.08923700  |
| H | 2.18268200  | 2.00407200  | 1.03621200  |
| C | 2.42721700  | 2.64406900  | 3.08581500  |
| H | 2.70275900  | 3.66504000  | 2.81269700  |
| C | 2.35521300  | 2.27070200  | 4.42732700  |
| H | 2.57434700  | 3.00033800  | 5.21014400  |
| C | 2.00384000  | 0.96431100  | 4.77146200  |
| H | 1.95082400  | 0.67041300  | 5.82201900  |
| C | 1.72376500  | 0.02920100  | 3.77702100  |
| H | 1.46339500  | -0.99441900 | 4.05772400  |
| C | 3.02424300  | -1.74417100 | 0.97512500  |
| C | 4.25229800  | -1.17000700 | 1.32388600  |
| H | 4.29556500  | -0.14923500 | 1.70950000  |
| C | 5.43345100  | -1.89762300 | 1.18267200  |
| H | 6.38580300  | -1.43857200 | 1.45696400  |
| C | 5.39837600  | -3.20541800 | 0.70077600  |
| H | 6.32434500  | -3.77491300 | 0.59421100  |
| C | 4.17636300  | -3.78654400 | 0.36103100  |
| H | 4.14072900  | -4.81226500 | -0.01229400 |
| C | 2.99541300  | -3.05977900 | 0.49337000  |
| H | 2.04994700  | -3.52848700 | 0.21196000  |
| C | 0.20268400  | -1.99487300 | 1.70535700  |
| H | 0.67389200  | -2.84216700 | 2.22332300  |
| H | -0.41802900 | -1.45763100 | 2.43932400  |
| C | -0.66725300 | -2.42512800 | 0.51669100  |
| H | -0.13844900 | -3.14885800 | -0.12023400 |
| H | -1.57614200 | -2.92694800 | 0.88471100  |
| C | -1.71381200 | -0.26708700 | 0.24740000  |
| C | -1.65605300 | 2.17182300  | 0.17804200  |
| C | -0.92380000 | 3.21236700  | 0.76293100  |
| H | 0.05783100  | 2.99453700  | 1.18496100  |
| C | -1.43856700 | 4.50360800  | 0.80252000  |
| H | -0.84669000 | 5.29961600  | 1.26335300  |
| C | -2.69966900 | 4.80401000  | 0.26834800  |
| C | -3.42388000 | 3.75714800  | -0.31235300 |
| H | -4.40628500 | 3.95911900  | -0.74798700 |
| C | -2.91462500 | 2.46087800  | -0.36702500 |
| H | -3.49409600 | 1.67181200  | -0.85101000 |
| C | -3.24801500 | 6.20467500  | 0.32684000  |
| H | -4.18103200 | 6.29555800  | -0.24713800 |
| H | -2.52744000 | 6.93333200  | -0.07571300 |
| H | -3.46279700 | 6.50298300  | 1.36569000  |



|    |             |             |             |
|----|-------------|-------------|-------------|
| C  | -3.86068300 | -1.41754600 | 0.82149800  |
| C  | -4.88996000 | -1.42894800 | 1.77229400  |
| H  | -4.88324800 | -0.69362200 | 2.58133400  |
| C  | -5.92033200 | -2.35826100 | 1.68577700  |
| H  | -6.71379000 | -2.33947100 | 2.43807700  |
| C  | -5.96196100 | -3.31040000 | 0.65882500  |
| C  | -4.92736400 | -3.28581100 | -0.28191600 |
| H  | -4.93013700 | -4.00873000 | -1.10239400 |
| C  | -3.88973100 | -2.35718600 | -0.21520800 |
| H  | -3.10829400 | -2.36389600 | -0.97550700 |
| C  | -7.06518300 | -4.33206500 | 0.58984300  |
| H  | -6.86505300 | -5.17759200 | 1.26869400  |
| H  | -7.17072800 | -4.74214000 | -0.42490400 |
| H  | -8.03180800 | -3.89924900 | 0.88738600  |
| H  | -3.15142700 | 0.38821500  | 1.49044800  |
| Ir | 0.58989900  | 0.04638100  | -0.92371400 |

4 · H<sub>2</sub>O

|   |             |             |             |
|---|-------------|-------------|-------------|
| P | 1.26979100  | -1.00367300 | 1.12786600  |
| N | -1.18153200 | -1.26338600 | -0.33110200 |
| N | -1.05160800 | 0.89107000  | -0.00654000 |
| N | -2.98769500 | -0.15687000 | 0.84585300  |
| C | 2.14980200  | -0.79869800 | -2.32296500 |
| C | 0.88118900  | -0.95722600 | -2.97092200 |
| C | 0.25295900  | 0.33641800  | -3.07529000 |
| C | 1.16332000  | 1.30046900  | -2.50215700 |
| C | 2.31740300  | 0.61216200  | -2.01529700 |
| C | 3.21113000  | -1.84261700 | -2.21248200 |
| H | 2.78661100  | -2.84702800 | -2.08992000 |
| H | 3.88911800  | -1.65121600 | -1.37171000 |
| H | 3.81266400  | -1.84145700 | -3.13604200 |
| C | 0.30979200  | -2.23867800 | -3.48048800 |
| H | -0.78273400 | -2.25843900 | -3.36854700 |
| H | 0.72764500  | -3.10286600 | -2.94745900 |
| H | 0.54311500  | -2.35459200 | -4.55094000 |
| C | -1.03557000 | 0.63502000  | -3.77248700 |
| H | -0.87577400 | 0.72710000  | -4.85868700 |
| H | -1.47201900 | 1.57786800  | -3.41648000 |
| H | -1.77206400 | -0.16403600 | -3.60758900 |
| C | 0.93251700  | 2.77392100  | -2.45319800 |
| H | 1.48322900  | 3.23823900  | -1.62680300 |
| H | -0.13354200 | 3.01254300  | -2.33787800 |
| H | 1.27936100  | 3.22897700  | -3.39486300 |
| C | 3.55044000  | 1.23493100  | -1.44141300 |
| H | 4.28746900  | 1.42003100  | -2.23986000 |
| H | 4.02147900  | 0.57288700  | -0.70155700 |
| H | 3.32831900  | 2.19368800  | -0.95244700 |
| C | 1.64991700  | 0.18155500  | 2.45698600  |
| C | 2.12473900  | 1.45063000  | 2.11171700  |
| H | 2.21615200  | 1.73546000  | 1.06118200  |
| C | 2.47311200  | 2.36686300  | 3.10392400  |
| H | 2.83140800  | 3.35507000  | 2.80878200  |
| C | 2.34464700  | 2.01760400  | 4.44723600  |
| H | 2.61168800  | 2.73446300  | 5.22718900  |
| C | 1.87437800  | 0.75025700  | 4.79810400  |
| H | 1.77572800  | 0.47477400  | 5.85045100  |
| C | 1.53250500  | -0.16901300 | 3.80848500  |
| H | 1.17656800  | -1.16179800 | 4.09549300  |

|    |             |             |             |
|----|-------------|-------------|-------------|
| C  | 2.73521000  | -2.09003000 | 1.08149900  |
| C  | 4.00575700  | -1.58907400 | 1.38926500  |
| H  | 4.12738700  | -0.55684300 | 1.72518300  |
| C  | 5.12883200  | -2.40758800 | 1.27407500  |
| H  | 6.11573700  | -2.00741700 | 1.51650400  |
| C  | 4.99216500  | -3.73166000 | 0.85845400  |
| H  | 5.87269400  | -4.37214500 | 0.77202300  |
| C  | 3.72719000  | -4.23766100 | 0.55904000  |
| H  | 3.61353200  | -5.27482100 | 0.23611100  |
| C  | 2.60381600  | -3.42042300 | 0.66425200  |
| H  | 1.62347800  | -3.82878500 | 0.40768100  |
| C  | -0.12670600 | -2.06196100 | 1.72641900  |
| H  | 0.24247100  | -2.94183600 | 2.27234900  |
| H  | -0.70712500 | -1.45163100 | 2.43546100  |
| C  | -1.01086200 | -2.42880300 | 0.52712500  |
| H  | -0.54699800 | -3.22305800 | -0.07527200 |
| H  | -1.97483600 | -2.82284300 | 0.88626500  |
| C  | -1.80788300 | -0.17527000 | 0.17137400  |
| C  | -1.44834600 | 2.23749500  | 0.06639100  |
| C  | -0.77036500 | 3.11785000  | 0.91736400  |
| H  | 0.01529600  | 2.72330000  | 1.56366300  |
| C  | -1.10221200 | 4.46973700  | 0.94436300  |
| H  | -0.56177000 | 5.14016100  | 1.61974500  |
| C  | -2.12417500 | 4.98478500  | 0.13392700  |
| C  | -2.80928300 | 4.09065200  | -0.69685300 |
| H  | -3.61386200 | 4.46160200  | -1.33773900 |
| C  | -2.47955400 | 2.73671700  | -0.73782400 |
| H  | -3.01743400 | 2.06345000  | -1.40870600 |
| C  | -2.49325100 | 6.44251400  | 0.18763200  |
| H  | -3.00994000 | 6.76082200  | -0.72897000 |
| H  | -1.60514600 | 7.07712300  | 0.32300000  |
| H  | -3.16913800 | 6.64435500  | 1.03500300  |
| C  | -4.06422200 | -1.06285100 | 0.79000600  |
| C  | -5.07079700 | -0.93747000 | 1.75384000  |
| H  | -4.98437400 | -0.16804300 | 2.52544300  |
| C  | -6.17893800 | -1.77978200 | 1.73153100  |
| H  | -6.95219300 | -1.65723700 | 2.49472400  |
| C  | -6.31977700 | -2.77495200 | 0.75825800  |
| C  | -5.30469100 | -2.88657000 | -0.20027500 |
| H  | -5.38541100 | -3.64856500 | -0.98078700 |
| C  | -4.19360000 | -2.04776800 | -0.19817800 |
| H  | -3.42950400 | -2.15655700 | -0.96859600 |
| C  | -7.50351800 | -3.70477700 | 0.74415400  |
| H  | -7.21367300 | -4.71990300 | 1.06133500  |
| H  | -7.93241600 | -3.79182800 | -0.26580100 |
| H  | -8.29561400 | -3.35743300 | 1.42265800  |
| H  | -3.17475600 | 0.70338400  | 1.35347600  |
| O  | 2.44885700  | 4.16642800  | 0.35530800  |
| H  | 2.65685500  | 4.89761600  | -0.23853200 |
| H  | 1.48513300  | 4.18602600  | 0.41466000  |
| Ir | 0.53627100  | -0.16260800 | -0.95291800 |

4 ·MeOH

|   |             |             |             |
|---|-------------|-------------|-------------|
| P | 1.02914600  | -1.27900200 | 1.14882700  |
| N | -1.46650700 | -1.13826700 | -0.24297500 |
| N | -0.96513800 | 0.96273400  | 0.05111800  |
| N | -3.04266500 | 0.26185200  | 0.94132000  |
| C | 1.79292900  | -1.28629900 | -2.35631700 |

|   |             |             |             |
|---|-------------|-------------|-------------|
| C | 0.49718000  | -1.17532800 | -2.96132100 |
| C | 0.14080000  | 0.21910100  | -3.03026000 |
| C | 1.24780300  | 0.97195500  | -2.47957900 |
| C | 2.25710900  | 0.05740900  | -2.05326400 |
| C | 2.62317700  | -2.52520500 | -2.28090600 |
| H | 2.00753800  | -3.42066600 | -2.12809500 |
| H | 3.36139600  | -2.47352100 | -1.47090600 |
| H | 3.17272600  | -2.65146700 | -3.22789700 |
| C | -0.33927500 | -2.30803800 | -3.45733300 |
| H | -1.40935800 | -2.10389400 | -3.31678600 |
| H | -0.09517300 | -3.24369200 | -2.93678800 |
| H | -0.16117900 | -2.46226200 | -4.53354100 |
| C | -1.08450600 | 0.78935300  | -3.67025400 |
| H | -0.93834900 | 0.90486900  | -4.75605900 |
| H | -1.32282600 | 1.77877000  | -3.25690900 |
| H | -1.95596300 | 0.13804700  | -3.51475300 |
| C | 1.32252000  | 2.45997400  | -2.39632300 |
| H | 1.91875100  | 2.77602100  | -1.53183400 |
| H | 0.32483300  | 2.91142600  | -2.31249400 |
| H | 1.79829000  | 2.85643200  | -3.30765700 |
| C | 3.60913700  | 0.41283600  | -1.52270100 |
| H | 4.33840800  | 0.45828600  | -2.34796800 |
| H | 3.96594200  | -0.33886200 | -0.80506600 |
| H | 3.59842900  | 1.39059800  | -1.02139900 |
| C | 1.63280600  | -0.16629700 | 2.45670900  |
| C | 2.33264600  | 0.98788700  | 2.09124600  |
| H | 2.46742400  | 1.24232800  | 1.03756700  |
| C | 2.85356200  | 1.83456300  | 3.06929000  |
| H | 3.38674500  | 2.73468100  | 2.75726300  |
| C | 2.67428900  | 1.53159900  | 4.41809100  |
| H | 3.07637800  | 2.19612200  | 5.18641800  |
| C | 1.97961800  | 0.37832900  | 4.78874200  |
| H | 1.84013700  | 0.13820600  | 5.84516200  |
| C | 1.46476100  | -0.47317400 | 3.81330900  |
| H | 0.93287900  | -1.37880100 | 4.11581700  |
| C | 2.30005700  | -2.58650200 | 1.06886800  |
| C | 3.64726100  | -2.28621200 | 1.30376000  |
| H | 3.94493100  | -1.28088600 | 1.61056700  |
| C | 4.62225700  | -3.27103400 | 1.15015600  |
| H | 5.67057200  | -3.02622900 | 1.33478900  |
| C | 4.26054100  | -4.56303400 | 0.76942000  |
| H | 5.02551600  | -5.33398400 | 0.65276600  |
| C | 2.91856900  | -4.86934500 | 0.54404500  |
| H | 2.62836500  | -5.88009100 | 0.24882300  |
| C | 1.94260100  | -3.88544500 | 0.68751100  |
| H | 0.89895800  | -4.13806500 | 0.48723100  |
| C | -0.50885500 | -2.08886500 | 1.79339700  |
| H | -0.27698400 | -3.01288100 | 2.34212100  |
| H | -0.96021500 | -1.38362500 | 2.50875900  |
| C | -1.47517400 | -2.31085600 | 0.62109300  |
| H | -1.16917400 | -3.17692700 | 0.01657800  |
| H | -2.48336400 | -2.53086600 | 1.00772400  |
| C | -1.88738200 | 0.04340300  | 0.26026100  |
| C | -1.12566000 | 2.35705100  | 0.11357700  |
| C | -0.24919200 | 3.12257900  | 0.89093700  |
| H | 0.51056600  | 2.61188200  | 1.48433700  |
| C | -0.35174400 | 4.51034500  | 0.91012200  |
| H | 0.34018000  | 5.08885600  | 1.53024200  |
| C | -1.33239900 | 5.17923100  | 0.16324200  |

|    |             |             |             |
|----|-------------|-------------|-------------|
| C  | -2.21219200 | 4.40182300  | -0.59881000 |
| H  | -2.98864800 | 4.89371000  | -1.19113700 |
| C  | -2.11352000 | 3.01142400  | -0.63178400 |
| H  | -2.80075900 | 2.42862200  | -1.24903700 |
| C  | -1.45298200 | 6.67856700  | 0.21205800  |
| H  | -2.00019800 | 7.06672900  | -0.65873200 |
| H  | -0.46479000 | 7.16090300  | 0.24208500  |
| H  | -1.99804100 | 6.99833900  | 1.11550800  |
| C  | -4.25623900 | -0.44852000 | 0.84353400  |
| C  | -5.22315100 | -0.24469200 | 1.83484100  |
| H  | -5.00935000 | 0.43370400  | 2.66488400  |
| C  | -6.45172100 | -0.89403800 | 1.76294600  |
| H  | -7.19223900 | -0.71425700 | 2.54708800  |
| C  | -6.75419700 | -1.77191000 | 0.71449900  |
| C  | -5.77707000 | -1.96155500 | -0.26949500 |
| H  | -5.98387200 | -2.63062100 | -1.10944000 |
| C  | -4.54614900 | -1.31161300 | -0.21933400 |
| H  | -3.80939400 | -1.47351400 | -1.00705000 |
| C  | -8.06919700 | -2.50244500 | 0.66260900  |
| H  | -8.02328300 | -3.43994700 | 1.24134300  |
| H  | -8.34073600 | -2.76782000 | -0.36944700 |
| H  | -8.88316300 | -1.89682000 | 1.08732200  |
| H  | -3.09152600 | 1.14890300  | 1.43491200  |
| O  | 3.14860700  | 3.55213600  | 0.30116100  |
| H  | 2.25708500  | 3.90889700  | 0.38923900  |
| C  | 3.93295400  | 4.47131300  | -0.42324800 |
| H  | 4.94406800  | 4.05038200  | -0.51564800 |
| H  | 3.54256300  | 4.64586900  | -1.44203500 |
| H  | 4.01555600  | 5.44501400  | 0.09079700  |
| Ir | 0.39003400  | -0.35602900 | -0.92748800 |

**5**

|    |             |             |             |
|----|-------------|-------------|-------------|
| Rh | 0.73469000  | -0.75246400 | -0.46411100 |
| P  | 2.33322700  | 0.24623000  | 0.81443300  |
| N  | -0.57223000 | 0.46342700  | 0.70106900  |
| N  | -2.17131900 | -1.18603900 | 0.80037800  |
| N  | -2.73456600 | 0.94883900  | 1.52206600  |
| C  | -0.09196300 | -2.20732500 | -1.93013100 |
| C  | -0.52591500 | -0.90290900 | -2.31568100 |
| C  | 0.62511300  | -0.09434800 | -2.62975400 |
| C  | 1.77962800  | -0.90716000 | -2.42160400 |
| C  | 1.35027200  | -2.20504800 | -1.95531400 |
| C  | -0.96193500 | -3.39804200 | -1.67084700 |
| H  | -1.97074700 | -3.10435700 | -1.35018800 |
| H  | -0.53398600 | -4.05355800 | -0.89988300 |
| H  | -1.07241700 | -3.99542200 | -2.59060700 |
| C  | -1.94101100 | -0.45945100 | -2.49382500 |
| H  | -2.19547100 | -0.47102900 | -3.56609800 |
| H  | -2.09339400 | 0.56842300  | -2.13738700 |
| H  | -2.64846800 | -1.11840700 | -1.97612300 |
| C  | 0.58282600  | 1.28537900  | -3.20880600 |
| H  | 1.54082100  | 1.80648600  | -3.07737000 |
| H  | -0.20159700 | 1.89580900  | -2.73786300 |
| H  | 0.36744700  | 1.25140800  | -4.28982900 |
| C  | 3.18903900  | -0.54276000 | -2.75700400 |
| H  | 3.42297400  | -0.90083100 | -3.77287800 |
| H  | 3.90742500  | -1.00714100 | -2.06809500 |
| H  | 3.34931600  | 0.54296900  | -2.73822700 |

|   |             |             |             |
|---|-------------|-------------|-------------|
| C | 2.22701200  | -3.40505500 | -1.77813400 |
| H | 1.81234700  | -4.10135100 | -1.03639500 |
| H | 3.23839200  | -3.12457100 | -1.45389100 |
| H | 2.32431400  | -3.94987700 | -2.73172900 |
| C | 1.34196500  | 1.29138800  | 1.96455100  |
| H | 1.16025800  | 0.67136700  | 2.85634300  |
| H | 1.89693300  | 2.18826700  | 2.27499900  |
| C | 0.01068000  | 1.65250600  | 1.31113100  |
| H | -0.65223500 | 2.07513100  | 2.07942100  |
| H | 0.15209000  | 2.43226500  | 0.54510600  |
| C | 3.48417800  | 1.37430200  | -0.05041900 |
| C | 2.97508400  | 2.52391200  | -0.67158500 |
| H | 1.91455400  | 2.77257500  | -0.59466700 |
| C | 3.81237600  | 3.35747900  | -1.40861500 |
| H | 3.40317300  | 4.25195600  | -1.88353200 |
| C | 5.16649200  | 3.04686200  | -1.54503400 |
| H | 5.82186400  | 3.69782600  | -2.12803100 |
| C | 5.67848700  | 1.90362700  | -0.93455900 |
| H | 6.73677100  | 1.65355700  | -1.03731800 |
| C | 4.84325000  | 1.07081300  | -0.18947500 |
| H | 5.26035400  | 0.17636900  | 0.27804200  |
| C | 3.41724100  | -0.76040500 | 1.87794500  |
| C | 3.55326300  | -2.13223900 | 1.64731500  |
| H | 2.98982900  | -2.60346700 | 0.83949800  |
| C | 4.39976500  | -2.89830600 | 2.44977400  |
| H | 4.50237600  | -3.96929100 | 2.26164100  |
| C | 5.10642800  | -2.29809200 | 3.49031200  |
| H | 5.76524500  | -2.89876300 | 4.12168300  |
| C | 4.97165000  | -0.92841500 | 3.72758300  |
| H | 5.52337000  | -0.45589700 | 4.54324000  |
| C | 4.13456800  | -0.16003800 | 2.92283400  |
| H | 4.04479100  | 0.91355300  | 3.10869900  |
| C | -1.79481600 | 0.10442200  | 0.99308700  |
| C | -3.46500700 | -1.72292800 | 0.65160100  |
| C | -4.52393600 | -1.01382200 | 0.07298500  |
| H | -4.38687400 | 0.01227900  | -0.27110100 |
| C | -5.76576500 | -1.62718700 | -0.08721600 |
| H | -6.57919800 | -1.05513000 | -0.54135600 |
| C | -5.98701300 | -2.95426000 | 0.29464800  |
| C | -4.91072200 | -3.65507100 | 0.85601700  |
| H | -5.04585900 | -4.69640200 | 1.16087100  |
| C | -3.67191200 | -3.05225500 | 1.04153300  |
| H | -2.84722200 | -3.61350500 | 1.48757700  |
| C | -7.33077300 | -3.61029600 | 0.12494100  |
| H | -7.83528100 | -3.73301800 | 1.09718400  |
| H | -7.23298200 | -4.61322400 | -0.31753600 |
| H | -7.99122300 | -3.01378100 | -0.52021800 |
| C | -3.01971700 | 2.26665400  | 1.11168400  |
| C | -2.52436500 | 2.81562500  | -0.07440200 |
| H | -1.87193700 | 2.22903400  | -0.72250600 |
| C | -2.86471900 | 4.11894200  | -0.43603800 |
| H | -2.46346000 | 4.52727300  | -1.36767100 |
| C | -3.70701200 | 4.90582700  | 0.35409700  |
| C | -4.20584800 | 4.33433400  | 1.53354500  |
| H | -4.87138600 | 4.91841200  | 2.17531300  |
| C | -3.86763000 | 3.04116200  | 1.91408800  |
| H | -4.26249700 | 2.62016400  | 2.84222800  |
| C | -4.06558200 | 6.31602400  | -0.03148600 |
| H | -3.65804500 | 6.57913500  | -1.01788000 |

|   |             |             |             |
|---|-------------|-------------|-------------|
| H | -3.67053800 | 7.03946300  | 0.69972700  |
| H | -5.15716500 | 6.45635000  | -0.06616700 |
| H | -3.47011300 | 0.50038400  | 2.05997900  |
| H | -1.38543100 | -1.82760400 | 0.69985600  |
| H | 0.70818600  | -1.73308200 | 0.76856900  |

5 · CH<sub>2</sub>O

|    |             |             |             |
|----|-------------|-------------|-------------|
| Rh | -0.74968300 | -0.51481500 | 0.60399200  |
| P  | -2.33365000 | 0.36790500  | -0.78073000 |
| N  | 0.56871300  | 0.57846000  | -0.66533000 |
| N  | 2.15629300  | -1.08686900 | -0.61931300 |
| N  | 2.72535700  | 0.96222100  | -1.55288700 |
| C  | 0.08741400  | -1.79835900 | 2.20808600  |
| C  | 0.48142200  | -0.44955300 | 2.46976600  |
| C  | -0.69441000 | 0.35189800  | 2.69301100  |
| C  | -1.82520800 | -0.51169700 | 2.54766800  |
| C  | -1.35368300 | -1.83530400 | 2.21863600  |
| C  | 0.98194600  | -2.99101100 | 2.08464700  |
| H  | 2.01476000  | -2.70375100 | 1.84532600  |
| H  | 0.63417600  | -3.68573300 | 1.30733500  |
| H  | 1.00799900  | -3.54242500 | 3.03879300  |
| C  | 1.88330700  | 0.04805000  | 2.60621300  |
| H  | 2.15922200  | 0.08028500  | 3.67272200  |
| H  | 1.99274100  | 1.06658300  | 2.21021200  |
| H  | 2.60291400  | -0.60388400 | 2.09565700  |
| C  | -0.69803700 | 1.77602700  | 3.15268400  |
| H  | -1.67517100 | 2.25035000  | 2.99104400  |
| H  | 0.06124400  | 2.37287800  | 2.62667900  |
| H  | -0.47368700 | 1.83714800  | 4.23057300  |
| C  | -3.24921600 | -0.15221200 | 2.82072400  |
| H  | -3.49289600 | -0.40695800 | 3.86508600  |
| H  | -3.94187300 | -0.70632200 | 2.17303200  |
| H  | -3.43586100 | 0.92053700  | 2.68338600  |
| C  | -2.18398300 | -3.07768500 | 2.14043100  |
| H  | -1.77486100 | -3.78883500 | 1.40924000  |
| H  | -3.22389900 | -2.85612500 | 1.86474600  |
| H  | -2.20306800 | -3.58202100 | 3.12065200  |
| C  | -1.33100000 | 1.31953500  | -2.00106600 |
| H  | -1.14170200 | 0.63786900  | -2.84490500 |
| H  | -1.88100000 | 2.19313800  | -2.37884700 |
| C  | -0.00535000 | 1.72433200  | -1.36177500 |
| H  | 0.66558700  | 2.09362400  | -2.15007700 |
| H  | -0.15414600 | 2.55401800  | -0.65168100 |
| C  | -3.50436500 | 1.55710600  | -0.03432600 |
| C  | -2.99844500 | 2.73234300  | 0.53916300  |
| H  | -1.92887400 | 2.94974600  | 0.49920900  |
| C  | -3.84956800 | 3.62514100  | 1.18479300  |
| H  | -3.44333300 | 4.53883200  | 1.62432200  |
| C  | -5.21461500 | 3.34741800  | 1.27779400  |
| H  | -5.88168300 | 4.04455900  | 1.78978700  |
| C  | -5.72307000 | 2.17821400  | 0.71533800  |
| H  | -6.78990900 | 1.95457200  | 0.78516600  |
| C  | -4.87383300 | 1.28616200  | 0.05965000  |
| H  | -5.28820400 | 0.37330900  | -0.37355900 |
| C  | -3.39363600 | -0.73985900 | -1.76403500 |
| C  | -3.64016200 | -2.04246100 | -1.31984600 |
| H  | -3.16994500 | -2.39857700 | -0.40106500 |
| C  | -4.47725600 | -2.88696400 | -2.04953900 |

|   |             |             |             |
|---|-------------|-------------|-------------|
| H | -4.66608000 | -3.90281900 | -1.69539700 |
| C | -5.06523100 | -2.43538800 | -3.23018000 |
| H | -5.71653200 | -3.09791600 | -3.80482800 |
| C | -4.82218600 | -1.13580600 | -3.67884700 |
| H | -5.28270800 | -0.77947400 | -4.60291400 |
| C | -3.99418700 | -0.28767700 | -2.94717500 |
| H | -3.82138000 | 0.73225200  | -3.29999500 |
| C | 1.78396100  | 0.17976300  | -0.93536500 |
| C | 3.45163000  | -1.61263600 | -0.42801100 |
| C | 4.52500900  | -0.84835900 | 0.04377000  |
| H | 4.40038800  | 0.21101900  | 0.27140600  |
| C | 5.76639300  | -1.44850700 | 0.25001400  |
| H | 6.59212300  | -0.83376300 | 0.61824000  |
| C | 5.97165800  | -2.81305900 | 0.02165800  |
| C | 4.87873800  | -3.56660100 | -0.42773600 |
| H | 4.99981200  | -4.63867900 | -0.60551200 |
| C | 3.63915600  | -2.98094300 | -0.65976000 |
| H | 2.79363600  | -3.58254000 | -1.00389800 |
| C | 7.31717400  | -3.45226500 | 0.23656500  |
| H | 7.84497900  | -3.59154100 | -0.72127400 |
| H | 7.21905600  | -4.44527100 | 0.70004800  |
| H | 7.95831700  | -2.83351300 | 0.88064300  |
| C | 3.04593300  | 2.30076800  | -1.25015100 |
| C | 2.57049400  | 2.95307700  | -0.10938700 |
| H | 1.90704800  | 2.43377500  | 0.58315200  |
| C | 2.94899000  | 4.26996700  | 0.15034800  |
| H | 2.56442900  | 4.75948600  | 1.04926200  |
| C | 3.81024600  | 4.96928800  | -0.69971500 |
| C | 4.28724000  | 4.29513700  | -1.83299400 |
| H | 4.96760700  | 4.80850300  | -2.51812300 |
| C | 3.91178900  | 2.98639900  | -2.11199400 |
| H | 4.29342400  | 2.48210700  | -3.00357700 |
| C | 4.21143600  | 6.39370400  | -0.42386300 |
| H | 3.85906100  | 6.72762700  | 0.56243900  |
| H | 3.79226800  | 7.07830200  | -1.17888100 |
| H | 5.30548400  | 6.51355900  | -0.45228600 |
| H | 3.44538300  | 0.45662300  | -2.06027300 |
| H | 1.37375700  | -1.70874000 | -0.42258100 |
| C | -0.36828700 | -3.73143000 | -1.65563700 |
| O | 0.51617600  | -4.29386300 | -1.06022800 |
| H | -0.73179800 | -1.60404900 | -0.53217600 |
| H | -0.16504900 | -3.01217300 | -2.48200300 |
| H | -1.44248300 | -3.92259600 | -1.43579600 |

6

|   |             |             |             |
|---|-------------|-------------|-------------|
| P | 2.27152700  | 0.35398400  | 0.85688300  |
| N | -0.62819000 | 0.52875200  | 0.77150800  |
| N | -2.22901800 | -1.12026100 | 0.90311700  |
| N | -2.79060200 | 1.02905500  | 1.57647300  |
| C | -0.17092300 | -2.19757000 | -1.85970300 |
| C | -0.60725100 | -0.89943400 | -2.26015800 |
| C | 0.54236600  | -0.09361400 | -2.58727600 |
| C | 1.70257000  | -0.90318800 | -2.36563400 |
| C | 1.27764600  | -2.19722500 | -1.88846000 |
| C | -1.03523200 | -3.38627100 | -1.57572900 |
| H | -2.04454700 | -3.08895800 | -1.26004200 |
| H | -0.60269900 | -4.02076300 | -0.78984900 |
| H | -1.14165300 | -4.00434400 | -2.48204100 |

|   |             |             |             |
|---|-------------|-------------|-------------|
| C | -2.02407100 | -0.45902000 | -2.43540600 |
| H | -2.28683900 | -0.48680400 | -3.50513000 |
| H | -2.17460700 | 0.57347500  | -2.09206100 |
| H | -2.72592600 | -1.11085600 | -1.90123000 |
| C | 0.49961100  | 1.27157100  | -3.19990800 |
| H | 1.44909700  | 1.80520900  | -3.05802100 |
| H | -0.30093000 | 1.88441300  | -2.76071700 |
| H | 0.31010100  | 1.20993200  | -4.28456100 |
| C | 3.11083600  | -0.53311100 | -2.70285200 |
| H | 3.35175000  | -0.89988900 | -3.71368900 |
| H | 3.82886400  | -0.98260400 | -2.00364200 |
| H | 3.26143200  | 0.55402500  | -2.69351800 |
| C | 2.14952700  | -3.40120700 | -1.71254200 |
| H | 1.75591400  | -4.07209600 | -0.93658800 |
| H | 3.17361400  | -3.12021300 | -1.43186400 |
| H | 2.20731500  | -3.97277800 | -2.65344700 |
| C | 1.28741800  | 1.40157500  | 2.01009600  |
| H | 1.12578100  | 0.79330600  | 2.91376500  |
| H | 1.83175100  | 2.31178000  | 2.29881000  |
| C | -0.05527100 | 1.73363100  | 1.36564400  |
| H | -0.72076300 | 2.15010300  | 2.13424000  |
| H | 0.06546100  | 2.50672500  | 0.58948200  |
| C | 3.39673000  | 1.47879800  | -0.04597400 |
| C | 2.86071000  | 2.59694700  | -0.70066900 |
| H | 1.79450200  | 2.82246700  | -0.63020800 |
| C | 3.67762400  | 3.42636900  | -1.46446300 |
| H | 3.24758000  | 4.29641100  | -1.96567000 |
| C | 5.03812700  | 3.14173600  | -1.59468300 |
| H | 5.67765200  | 3.78870200  | -2.19934600 |
| C | 5.57679600  | 2.02975900  | -0.95052900 |
| H | 6.64017900  | 1.80020700  | -1.04849600 |
| C | 4.76184200  | 1.20216000  | -0.17742300 |
| H | 5.19933000  | 0.33213300  | 0.31660500  |
| C | 3.38565100  | -0.62653000 | 1.91487000  |
| C | 3.57276900  | -1.98978300 | 1.66862400  |
| H | 3.02785100  | -2.47268400 | 0.85480800  |
| C | 4.44700300  | -2.73286400 | 2.46240900  |
| H | 4.58918600  | -3.79711900 | 2.26217600  |
| C | 5.13140700  | -2.11883000 | 3.50992900  |
| H | 5.81207500  | -2.70187500 | 4.13462700  |
| C | 4.94640200  | -0.75793200 | 3.76218800  |
| H | 5.48099600  | -0.27433400 | 4.58273700  |
| C | 4.08092600  | -0.01207100 | 2.96594600  |
| H | 3.95336200  | 1.05541000  | 3.16393700  |
| C | -1.85368200 | 0.17214900  | 1.06664700  |
| C | -3.51976900 | -1.65942800 | 0.74121300  |
| C | -4.57430400 | -0.95531900 | 0.14898100  |
| H | -4.43873400 | 0.07144200  | -0.19346000 |
| C | -5.80991300 | -1.57609600 | -0.03000100 |
| H | -6.61962300 | -1.00857400 | -0.49629700 |
| C | -6.02932200 | -2.90459400 | 0.34772000  |
| C | -4.95793500 | -3.59905400 | 0.92617100  |
| H | -5.09152800 | -4.64119400 | 1.22892100  |
| C | -3.72535500 | -2.98946900 | 1.12945200  |
| H | -2.90371700 | -3.54636600 | 1.58645400  |
| C | -7.36531100 | -3.56961600 | 0.15319300  |
| H | -7.88005900 | -3.71181200 | 1.11730200  |
| H | -7.25350000 | -4.56467800 | -0.30367200 |
| H | -8.02337700 | -2.96918000 | -0.49076000 |



|    |             |             |             |
|----|-------------|-------------|-------------|
| C  | -3.07673700 | 2.33370000  | 1.12604000  |
| C  | -2.58653100 | 2.84091100  | -0.08031400 |
| H  | -1.93787200 | 2.23046800  | -0.71021300 |
| C  | -2.92724000 | 4.13165900  | -0.48417500 |
| H  | -2.53138100 | 4.50783800  | -1.43146600 |
| C  | -3.76395600 | 4.94577100  | 0.28417800  |
| C  | -4.25592100 | 4.41598800  | 1.48577600  |
| H  | -4.91591200 | 5.02303700  | 2.11170800  |
| C  | -3.91768500 | 3.13580500  | 1.90781200  |
| H  | -4.30684300 | 2.74732400  | 2.85225500  |
| C  | -4.12540200 | 6.34170800  | -0.14773600 |
| H  | -3.71184600 | 6.57528800  | -1.13896700 |
| H  | -3.73883900 | 7.08906700  | 0.56354600  |
| H  | -5.21735200 | 6.47591800  | -0.19434600 |
| H  | -3.52516700 | 0.59361700  | 2.12647000  |
| H  | -1.44412200 | -1.76609300 | 0.82704600  |
| H  | 0.63416500  | -1.65112700 | 0.91810200  |
| Ir | 0.67788000  | -0.71343600 | -0.39096300 |

**6**·CH<sub>2</sub>O

|   |             |             |             |
|---|-------------|-------------|-------------|
| P | 2.28142900  | 0.42397700  | 0.83760200  |
| N | -0.61407000 | 0.60635000  | 0.78099100  |
| N | -2.22434800 | -1.03450400 | 0.70591700  |
| N | -2.78049900 | 1.03338400  | 1.61467500  |
| C | -0.20135700 | -1.79270700 | -2.13763700 |
| C | -0.58932300 | -0.44455800 | -2.41242000 |
| C | 0.58743700  | 0.35030000  | -2.65610500 |
| C | 1.71935700  | -0.52020100 | -2.50365300 |
| C | 1.24618800  | -1.84083700 | -2.16720200 |
| C | -1.09774400 | -2.98106100 | -1.99129000 |
| H | -2.12772300 | -2.68718200 | -1.74838700 |
| H | -0.74504200 | -3.66358900 | -1.20537200 |
| H | -1.13108900 | -3.54622600 | -2.93694000 |
| C | -1.99065700 | 0.05860100  | -2.53635800 |
| H | -2.27503400 | 0.09673400  | -3.60019700 |
| H | -2.09350800 | 1.07498600  | -2.13363100 |
| H | -2.70758000 | -0.59331600 | -2.02229200 |
| C | 0.59497300  | 1.76606200  | -3.14046900 |
| H | 1.56793000  | 2.24556400  | -2.96894700 |
| H | -0.17470100 | 2.36872500  | -2.63657400 |
| H | 0.38981100  | 1.80825000  | -4.22315000 |
| C | 3.14274500  | -0.16077200 | -2.78461600 |
| H | 3.37774600  | -0.39283100 | -3.83597300 |
| H | 3.83756600  | -0.73008800 | -2.15254600 |
| H | 3.33234200  | 0.90828900  | -2.62395900 |
| C | 2.06678700  | -3.09020000 | -2.09554000 |
| H | 1.67158100  | -3.78567500 | -1.34187700 |
| H | 3.11498000  | -2.87268400 | -1.84953700 |
| H | 2.05481200  | -3.60936000 | -3.06791800 |
| C | 1.30276400  | 1.34937000  | 2.09614400  |
| H | 1.14143800  | 0.65698600  | 2.93705800  |
| H | 1.85033600  | 2.22620100  | 2.46915500  |
| C | -0.03893200 | 1.74662500  | 1.48863900  |
| H | -0.70415900 | 2.08947400  | 2.29319800  |
| H | 0.08811100  | 2.59113600  | 0.79228100  |
| C | 3.42043300  | 1.62828100  | 0.06673500  |
| C | 2.88221900  | 2.78154000  | -0.52180100 |
| H | 1.80730100  | 2.97185700  | -0.48308600 |

|    |             |             |             |
|----|-------------|-------------|-------------|
| C  | 3.70798000  | 3.68648000  | -1.18309900 |
| H  | 3.27684700  | 4.58282400  | -1.63455100 |
| C  | 5.07943700  | 3.44249100  | -1.27747100 |
| H  | 5.72648700  | 4.14893200  | -1.80232000 |
| C  | 5.61962900  | 2.29472700  | -0.70093600 |
| H  | 6.69137300  | 2.09665800  | -0.77275000 |
| C  | 4.79567600  | 1.39106700  | -0.02870200 |
| H  | 5.23427900  | 0.49480800  | 0.41500000  |
| C  | 3.37335600  | -0.68349300 | 1.78666400  |
| C  | 3.61964600  | -1.98193200 | 1.33025000  |
| H  | 3.13176600  | -2.33650300 | 0.41999500  |
| C  | 4.47678500  | -2.82451200 | 2.03820800  |
| H  | 4.66471100  | -3.83727300 | 1.67485000  |
| C  | 5.08622200  | -2.37524500 | 3.20893300  |
| H  | 5.75359700  | -3.03648300 | 3.76640700  |
| C  | 4.84341000  | -1.07999300 | 3.66975200  |
| H  | 5.32004100  | -0.72552400 | 4.58634600  |
| C  | 3.99411400  | -0.23403500 | 2.96009200  |
| H  | 3.81991700  | 0.78194000  | 3.32367100  |
| C  | -1.84357100 | 0.22579900  | 1.02662200  |
| C  | -3.51950000 | -1.55777600 | 0.50960100  |
| C  | -4.59136700 | -0.79378800 | 0.03462900  |
| H  | -4.46751700 | 0.26628100  | -0.18985200 |
| C  | -5.82997700 | -1.39624100 | -0.18204900 |
| H  | -6.65449900 | -0.78221200 | -0.55409600 |
| C  | -6.03345600 | -2.76209800 | 0.03967100  |
| C  | -4.94215600 | -3.51470200 | 0.49482900  |
| H  | -5.06198200 | -4.58764500 | 0.66806900  |
| C  | -3.70558400 | -2.92710700 | 0.73669800  |
| H  | -2.86072900 | -3.52827500 | 1.08354400  |
| C  | -7.37508900 | -3.40451100 | -0.18929000 |
| H  | -7.90884900 | -3.55347600 | 0.76374400  |
| H  | -7.26991900 | -4.39342100 | -0.65997500 |
| H  | -8.01412000 | -2.78320300 | -0.83297600 |
| C  | -3.06705600 | 2.37337700  | 1.28089100  |
| C  | -2.55642900 | 2.99511600  | 0.13825300  |
| H  | -1.88772500 | 2.45299400  | -0.53146500 |
| C  | -2.90622800 | 4.31305400  | -0.15430300 |
| H  | -2.49463800 | 4.77805900  | -1.05431600 |
| C  | -3.77238500 | 5.04354500  | 0.66389300  |
| C  | -4.28340200 | 4.40033000  | 1.80025700  |
| H  | -4.96802500 | 4.93877800  | 2.46154600  |
| C  | -3.93665300 | 3.09104000  | 2.11202200  |
| H  | -4.34493500 | 2.61178500  | 3.00553600  |
| C  | -4.14359600 | 6.46855400  | 0.35182600  |
| H  | -3.76473400 | 6.77720900  | -0.63285100 |
| H  | -3.72914300 | 7.16074600  | 1.10249200  |
| H  | -5.23582600 | 6.60686100  | 0.35427300  |
| H  | -3.52622100 | 0.55115100  | 2.10757800  |
| H  | -1.44105100 | -1.65662700 | 0.50473500  |
| C  | 0.30857500  | -3.70426700 | 1.73415300  |
| O  | -0.58439800 | -4.26473800 | 1.14992600  |
| H  | 0.67114300  | -1.57277600 | 0.66372000  |
| H  | 0.11726700  | -2.98691000 | 2.56481600  |
| H  | 1.38002300  | -3.89356600 | 1.49825300  |
| Ir | 0.68433600  | -0.49647700 | -0.53078200 |

|   |             |             |             |
|---|-------------|-------------|-------------|
| N | -0.69718000 | -0.97493200 | -1.02097000 |
| N | -2.13271100 | -0.75323100 | 0.78855900  |
| N | -3.01028400 | -1.10532300 | -1.32735300 |
| C | 0.70339800  | 0.14843300  | -2.72565600 |
| C | -0.47048900 | -0.82018700 | -2.45740200 |
| H | -0.25254800 | -1.79711800 | -2.91437200 |
| H | -1.37750000 | -0.43371800 | -2.94657500 |
| C | -1.90895500 | -0.94932400 | -0.53093300 |
| C | -1.30751500 | -0.04613100 | 1.69672800  |
| C | 0.08858100  | -0.00995300 | 1.57310600  |
| C | 0.78854700  | 0.74151500  | 2.52309500  |
| H | 1.87909300  | 0.80112400  | 2.44458900  |
| C | 0.17027300  | 1.42356900  | 3.57836100  |
| C | -1.22201000 | 1.34568800  | 3.67895900  |
| H | -1.74364700 | 1.86077300  | 4.48991300  |
| C | -1.95462200 | 0.62268100  | 2.74276300  |
| H | -3.04471900 | 0.57207200  | 2.82109500  |
| C | 0.98941400  | 2.23791500  | 4.54467300  |
| H | 1.89417700  | 1.69657600  | 4.86153300  |
| H | 1.32227900  | 3.18156400  | 4.08077600  |
| H | 0.41511900  | 2.49810900  | 5.44553800  |
| C | -4.32904800 | -0.68428800 | -1.04315000 |
| C | -4.59277300 | 0.53783100  | -0.41501200 |
| H | -3.77203500 | 1.19621000  | -0.12309000 |
| C | -5.90921700 | 0.92217300  | -0.16645100 |
| H | -6.09351900 | 1.87774500  | 0.33167800  |
| C | -6.99198100 | 0.12565400  | -0.55423200 |
| C | -6.70939400 | -1.08486800 | -1.20180700 |
| H | -7.53251300 | -1.73052400 | -1.52019200 |
| C | -5.40070400 | -1.49414500 | -1.43521000 |
| H | -5.20305900 | -2.45082100 | -1.92525600 |
| C | -8.41403000 | 0.54743300  | -0.29871800 |
| H | -8.96015500 | -0.22028100 | 0.27130300  |
| H | -8.45942900 | 1.48785400  | 0.26826000  |
| H | -8.95915000 | 0.69580600  | -1.24439400 |
| H | -3.08611600 | -0.90099000 | 1.09965500  |
| H | -2.89395600 | -1.68558600 | -2.15057400 |
| H | 1.56879400  | -0.38737100 | -3.14350200 |
| H | 0.42911600  | 0.94175400  | -3.43609300 |
| P | 1.28137100  | 0.82705200  | -1.12069300 |
| C | 2.90840800  | 1.58836600  | -1.40321800 |
| C | 3.38105800  | 1.89703300  | -2.68442000 |
| C | 3.71131300  | 1.85989800  | -0.28774300 |
| C | 4.64429000  | 2.46560700  | -2.84331000 |
| H | 2.77130300  | 1.69530400  | -3.56746700 |
| C | 4.96781700  | 2.43945900  | -0.44947800 |
| H | 3.35482500  | 1.60743800  | 0.71385800  |
| C | 5.43721900  | 2.73845000  | -1.72862100 |
| H | 5.00913800  | 2.69946200  | -3.84585400 |
| H | 5.58518600  | 2.64969800  | 0.42655300  |
| H | 6.42549500  | 3.18553300  | -1.85756400 |
| C | 0.16115200  | 2.21964200  | -0.72379200 |
| C | -1.10555200 | 2.31968000  | -1.31197100 |
| C | 0.52730700  | 3.15110700  | 0.25709500  |
| C | -1.98835400 | 3.32807300  | -0.92371800 |
| H | -1.42859400 | 1.61697500  | -2.08139600 |
| C | -0.35750200 | 4.15251100  | 0.64762900  |
| H | 1.50864500  | 3.09853300  | 0.73158500  |
| C | -1.62038600 | 4.24142400  | 0.06164600  |

|    |             |             |             |
|----|-------------|-------------|-------------|
| H  | -2.97034700 | 3.39525500  | -1.39726700 |
| H  | -0.05750500 | 4.86561400  | 1.41852700  |
| H  | -2.31441000 | 5.02640000  | 0.37016900  |
| Rh | 1.05207500  | -1.08978000 | 0.14397600  |
| C  | 2.89433500  | -2.21295500 | -0.47116100 |
| C  | 2.97818400  | -1.78270500 | 0.91861100  |
| C  | 1.94459200  | -2.45783800 | 1.64736600  |
| C  | 1.78606300  | -3.08083000 | -0.59009100 |
| C  | 1.16810600  | -3.21285400 | 0.72086200  |
| C  | 3.87693000  | -1.85660200 | -1.54078000 |
| C  | 4.11917000  | -1.03536200 | 1.53289400  |
| C  | 1.75124400  | -2.42920900 | 3.12761800  |
| C  | 1.33691300  | -3.80693500 | -1.81712500 |
| C  | 0.04141300  | -4.13132600 | 1.07457300  |
| H  | 3.43139800  | -1.92138500 | -2.54333300 |
| H  | 4.73315500  | -2.54992200 | -1.51189500 |
| H  | 4.27069200  | -0.83963100 | -1.40730100 |
| H  | 3.78508300  | -0.36799500 | 2.34003100  |
| H  | 4.65730600  | -0.43357000 | 0.78985400  |
| H  | 4.84011700  | -1.74578400 | 1.97016600  |
| H  | 2.15435400  | -1.51084400 | 3.57388600  |
| H  | 2.27656100  | -3.28392600 | 3.58431500  |
| H  | 0.68934400  | -2.50139300 | 3.39895300  |
| H  | 1.69657100  | -4.84841600 | -1.79495600 |
| H  | 1.72562600  | -3.34026600 | -2.73228900 |
| H  | 0.24002400  | -3.84133600 | -1.88433900 |
| H  | -0.59639300 | -3.69893800 | 1.85826500  |
| H  | 0.43207800  | -5.09107400 | 1.45069300  |
| H  | -0.59174500 | -4.35196500 | 0.20445300  |

**7b**

|   |             |             |             |
|---|-------------|-------------|-------------|
| N | 1.30815000  | 0.27611900  | 0.06061000  |
| N | 1.21287300  | 2.12060400  | -1.35049800 |
| N | 3.07618800  | 1.84192200  | -0.04817300 |
| C | 0.57846800  | -0.71749100 | 2.21201800  |
| C | 1.77030200  | -0.28699000 | 1.32909200  |
| H | 2.41925300  | -1.15571100 | 1.14419800  |
| H | 2.37904500  | 0.45036900  | 1.87171300  |
| C | 1.85147400  | 1.35836300  | -0.43156300 |
| C | -0.18235200 | 2.20785800  | -1.57771200 |
| C | -1.05144500 | 1.13094000  | -1.35474900 |
| C | -2.41032400 | 1.35312700  | -1.61023200 |
| H | -3.11814700 | 0.53831200  | -1.42921700 |
| C | -2.92118400 | 2.56522500  | -2.08719800 |
| C | -2.01819000 | 3.60932400  | -2.31479200 |
| H | -2.37507500 | 4.57247200  | -2.68922800 |
| C | -0.66400000 | 3.43358800  | -2.05596500 |
| H | 0.03661100  | 4.25653800  | -2.22597200 |
| C | -4.40029100 | 2.74735100  | -2.30313100 |
| H | -4.88563200 | 1.80360700  | -2.59405200 |
| H | -4.89271500 | 3.09691000  | -1.37985400 |
| H | -4.60720900 | 3.49319900  | -3.08466300 |
| C | 4.24092400  | 1.10311900  | 0.25072200  |
| C | 4.46440300  | -0.17516600 | -0.26939400 |
| H | 3.72312700  | -0.63225000 | -0.92538500 |
| C | 5.62933400  | -0.86607100 | 0.05065600  |
| H | 5.77904000  | -1.86783500 | -0.36171800 |
| C | 6.61196900  | -0.30497100 | 0.87574000  |

|   |             |             |             |
|---|-------------|-------------|-------------|
| C | 6.38085500  | 0.98318100  | 1.37276100  |
| H | 7.12668900  | 1.45241000  | 2.01997600  |
| C | 5.21127700  | 1.67867800  | 1.07601200  |
| H | 5.04424400  | 2.67524000  | 1.49221100  |
| C | 7.87820100  | -1.05485600 | 1.19157300  |
| H | 8.39351700  | -0.62484500 | 2.06225500  |
| H | 7.67380700  | -2.11517900 | 1.40291000  |
| H | 8.57951900  | -1.02228600 | 0.34168400  |
| H | 1.77498200  | 2.84305800  | -1.78669600 |
| H | 3.20311500  | 2.84509300  | -0.14047400 |
| H | 0.52758800  | -1.81350400 | 2.29551100  |
| H | 0.65599800  | -0.31257800 | 3.23154800  |
| P | -0.97900200 | -0.21800700 | 1.38627100  |
| C | -2.34408600 | -1.10406800 | 2.19605500  |
| C | -2.20752100 | -1.70589600 | 3.45242300  |
| C | -3.56887700 | -1.18529800 | 1.52079400  |
| C | -3.28438000 | -2.38686100 | 4.01938700  |
| H | -1.26272000 | -1.65147100 | 3.99755300  |
| C | -4.64576100 | -1.85697800 | 2.09499300  |
| H | -3.67624300 | -0.73019700 | 0.53322700  |
| C | -4.50223300 | -2.46280600 | 3.34356400  |
| H | -3.17022300 | -2.85994400 | 4.99721500  |
| H | -5.59677100 | -1.91524900 | 1.56115500  |
| H | -5.34285300 | -2.99696100 | 3.79211100  |
| C | -1.23987200 | 1.54175100  | 1.81049400  |
| C | -0.18632200 | 2.34267600  | 2.26669400  |
| C | -2.49116400 | 2.12968900  | 1.58295600  |
| C | -0.37835600 | 3.70854100  | 2.47680800  |
| H | 0.80043800  | 1.91939700  | 2.46170000  |
| C | -2.68053200 | 3.49244300  | 1.79398800  |
| H | -3.32878300 | 1.52494100  | 1.23066000  |
| C | -1.62223800 | 4.28738200  | 2.23532200  |
| H | 0.45326000  | 4.32107000  | 2.83240600  |
| H | -3.66065500 | 3.93671400  | 1.60724000  |
| H | -1.77033100 | 5.35764000  | 2.39573300  |
| C | -0.73277800 | -2.91732900 | -0.84363700 |
| C | -1.61923400 | -2.20487900 | -1.75051000 |
| C | -0.80429900 | -1.59604000 | -2.76480100 |
| C | 0.59850800  | -2.68168000 | -1.25392500 |
| C | 0.56073700  | -1.83604300 | -2.43784900 |
| C | -1.17347500 | -3.80911700 | 0.27277600  |
| C | -3.10602100 | -2.35839400 | -1.81661600 |
| C | -1.30642100 | -0.88911900 | -3.98063300 |
| C | 1.83288200  | -3.26817400 | -0.64614200 |
| C | 1.73973700  | -1.43605900 | -3.26661900 |
| H | -0.42247900 | -3.86377200 | 1.07288400  |
| H | -1.33080300 | -4.83207800 | -0.10612000 |
| H | -2.11902500 | -3.47065900 | 0.71660200  |
| H | -3.59946400 | -1.43677900 | -2.15557200 |
| H | -3.53084200 | -2.64145700 | -0.84518600 |
| H | -3.36818500 | -3.15298300 | -2.53472700 |
| H | -2.27197100 | -0.40012300 | -3.79556500 |
| H | -1.44687900 | -1.61352400 | -4.79947600 |
| H | -0.59883600 | -0.12320800 | -4.32579700 |
| H | 2.10078300  | -4.20887200 | -1.15416800 |
| H | 1.69240700  | -3.49554300 | 0.41958200  |
| H | 2.69231100  | -2.59114300 | -0.74106000 |
| H | 1.60756400  | -0.43299900 | -3.69611200 |
| H | 1.88139800  | -2.14278300 | -4.10032900 |

|    |             |             |             |
|----|-------------|-------------|-------------|
| H  | 2.66606600  | -1.43415300 | -2.67719500 |
| Rh | -0.35948200 | -0.69695600 | -0.78478400 |

**8a**

|   |             |             |             |
|---|-------------|-------------|-------------|
| N | -0.78786500 | -0.87554300 | -1.00646600 |
| N | -2.21935700 | -0.66738100 | 0.80969700  |
| N | -3.09206700 | -1.10373400 | -1.29310700 |
| C | 0.54063900  | 0.29059900  | -2.74626100 |
| C | -0.58549200 | -0.72580600 | -2.44912600 |
| H | -0.33077300 | -1.69927200 | -2.89432600 |
| H | -1.51474400 | -0.38394100 | -2.92759700 |
| C | -1.99741600 | -0.88743300 | -0.50312300 |
| C | -1.39680800 | 0.05502200  | 1.71039700  |
| C | 0.00087200  | 0.09592300  | 1.58076600  |
| C | 0.69245300  | 0.85223400  | 2.53680100  |
| H | 1.78367500  | 0.91492500  | 2.46165100  |
| C | 0.07030300  | 1.53505800  | 3.58836800  |
| C | -1.32195400 | 1.45530600  | 3.68621800  |
| H | -1.84698900 | 1.97206000  | 4.49389900  |
| C | -2.04908100 | 0.72534900  | 2.75115900  |
| H | -3.13888500 | 0.66936100  | 2.82822100  |
| C | 0.88543300  | 2.35402000  | 4.55413100  |
| H | 1.79305400  | 1.81735300  | 4.87079800  |
| H | 1.21337100  | 3.29906900  | 4.08952800  |
| H | 0.31021600  | 2.61197900  | 5.45507400  |
| C | -4.42016400 | -0.69819500 | -1.03364200 |
| C | -4.71029700 | 0.53488700  | -0.44009100 |
| H | -3.90280300 | 1.21196100  | -0.15477300 |
| C | -6.03528500 | 0.90429500  | -0.21642600 |
| H | -6.24050000 | 1.86850200  | 0.25629600  |
| C | -7.10085900 | 0.08166800  | -0.59744300 |
| C | -6.79155700 | -1.13965400 | -1.21167500 |
| H | -7.60085500 | -1.80531500 | -1.52432800 |
| C | -5.47392700 | -1.53386200 | -1.41963100 |
| H | -5.25494600 | -2.49829600 | -1.88487400 |
| C | -8.53224000 | 0.48721400  | -0.36893700 |
| H | -9.07924300 | -0.28467000 | 0.19443300  |
| H | -8.59872700 | 1.42948200  | 0.19289500  |
| H | -9.06237700 | 0.62566800  | -1.32465800 |
| H | -3.16037900 | -0.85513900 | 1.13667400  |
| H | -2.95619100 | -1.70978600 | -2.09445200 |
| H | 1.40316400  | -0.20520400 | -3.21535100 |
| H | 0.20774300  | 1.08956800  | -3.42412300 |
| P | 1.16046200  | 0.95030300  | -1.15032000 |
| C | 2.77179900  | 1.73218000  | -1.46000000 |
| C | 3.19861400  | 2.08379500  | -2.74633700 |
| C | 3.60104200  | 1.99428800  | -0.36191700 |
| C | 4.44404100  | 2.68364700  | -2.92787900 |
| H | 2.56649500  | 1.89196300  | -3.61577500 |
| C | 4.83963000  | 2.60496700  | -0.54596300 |
| H | 3.27796300  | 1.71234400  | 0.64305900  |
| C | 5.26387000  | 2.94609900  | -1.83021600 |
| H | 4.77334700  | 2.95082900  | -3.93439200 |
| H | 5.47814200  | 2.80748200  | 0.31660300  |
| H | 6.23777100  | 3.41862400  | -1.97666900 |
| C | 0.03536400  | 2.32452400  | -0.70661600 |
| C | -1.25408800 | 2.40537400  | -1.24636900 |
| C | 0.42119600  | 3.25294100  | 0.26895800  |

|           |             |             |             |
|-----------|-------------|-------------|-------------|
| C         | -2.14104300 | 3.39119100  | -0.81284200 |
| H         | -1.59016200 | 1.70471000  | -2.01266400 |
| C         | -0.46774100 | 4.23185700  | 0.70479300  |
| H         | 1.42201000  | 3.21578700  | 0.70267600  |
| C         | -1.75385900 | 4.30049200  | 0.16908700  |
| H         | -3.14165600 | 3.44433200  | -1.24775100 |
| H         | -0.15266100 | 4.94295500  | 1.47150500  |
| H         | -2.45165400 | 5.06687600  | 0.51374600  |
| Ir        | 0.99700200  | -0.98553400 | 0.13936700  |
| C         | 2.80629700  | -2.14938800 | -0.57251600 |
| C         | 2.99263000  | -1.67358800 | 0.79470000  |
| C         | 2.00852600  | -2.31596100 | 1.61692200  |
| C         | 1.68980900  | -3.01950300 | -0.58043600 |
| C         | 1.16348200  | -3.10667300 | 0.77501300  |
| C         | 3.71248400  | -1.82400400 | -1.71770200 |
| C         | 4.17967300  | -0.91679200 | 1.30084200  |
| C         | 1.92136400  | -2.22680300 | 3.10474100  |
| C         | 1.14318000  | -3.77890300 | -1.74639200 |
| C         | 0.08035000  | -4.02904900 | 1.24080000  |
| H         | 3.23310300  | -2.02468000 | -2.68552800 |
| H         | 4.62671700  | -2.43670800 | -1.66399700 |
| H         | 4.02135000  | -0.76910400 | -1.69975100 |
| H         | 3.90883300  | -0.23888300 | 2.12296900  |
| H         | 4.65047000  | -0.32470800 | 0.50606100  |
| H         | 4.93698500  | -1.61951300 | 1.68587700  |
| H         | 2.30754400  | -1.26890700 | 3.47648000  |
| H         | 2.52238500  | -3.03223900 | 3.55681600  |
| H         | 0.88667200  | -2.33616400 | 3.45608800  |
| H         | 1.47450800  | -4.82875300 | -1.70397000 |
| H         | 1.48350100  | -3.35836600 | -2.70197800 |
| H         | 0.04349100  | -3.78050100 | -1.74064600 |
| H         | -0.47125900 | -3.59841600 | 2.08801700  |
| H         | 0.50519400  | -4.99219100 | 1.56772800  |
| H         | -0.64143300 | -4.24080200 | 0.44018900  |
| <b>8b</b> |             |             |             |
| N         | 1.34100600  | 0.37024000  | 0.13843600  |
| N         | 1.24540500  | 2.11031200  | -1.40219500 |
| N         | 3.11907100  | 1.90807300  | -0.10571600 |
| C         | 0.60291000  | -0.40908300 | 2.37967100  |
| C         | 1.79764600  | -0.07967800 | 1.45597700  |
| H         | 2.43256700  | -0.97182500 | 1.34827300  |
| H         | 2.41736400  | 0.69812500  | 1.92399000  |
| C         | 1.88699200  | 1.41147400  | -0.44013900 |
| C         | -0.15044500 | 2.18011100  | -1.63903700 |
| C         | -1.01304800 | 1.10878400  | -1.35877000 |
| C         | -2.36925700 | 1.30955800  | -1.65485500 |
| H         | -3.07623100 | 0.50258100  | -1.43782700 |
| C         | -2.87988200 | 2.48828600  | -2.20864300 |
| C         | -1.98265000 | 3.52734300  | -2.47573600 |
| H         | -2.34076800 | 4.46646400  | -2.90584800 |
| C         | -0.63136700 | 3.37507900  | -2.18710400 |
| H         | 0.06679300  | 4.19246300  | -2.38996300 |
| C         | -4.35638600 | 2.64352600  | -2.45939000 |
| H         | -4.81902100 | 1.68905900  | -2.75247500 |
| H         | -4.87475700 | 2.99155400  | -1.54984800 |
| H         | -4.55824700 | 3.37903600  | -3.25185000 |
| C         | 4.28168100  | 1.18487100  | 0.23370000  |
| C         | 4.46580100  | -0.15019600 | -0.13659200 |
| H         | 3.69130000  | -0.66963100 | -0.70099900 |

|    |             |             |             |
|----|-------------|-------------|-------------|
| C  | 5.63388100  | -0.81906700 | 0.21872100  |
| H  | 5.75209300  | -1.86584100 | -0.07479200 |
| C  | 6.65706400  | -0.18196800 | 0.93096500  |
| C  | 6.46329700  | 1.16048600  | 1.27895500  |
| H  | 7.24118800  | 1.69000300  | 1.83550500  |
| C  | 5.29329200  | 1.83706300  | 0.94530400  |
| H  | 5.15842200  | 2.88041100  | 1.24127800  |
| C  | 7.92857500  | -0.90708700 | 1.28206800  |
| H  | 8.43625400  | -0.43685500 | 2.13655400  |
| H  | 7.73400100  | -1.96011200 | 1.53391300  |
| H  | 8.63407700  | -0.89944900 | 0.43482000  |
| H  | 1.81425100  | 2.77891500  | -1.90916400 |
| H  | 3.25233000  | 2.90060900  | -0.27485400 |
| H  | 0.56609400  | -1.48594300 | 2.60134400  |
| H  | 0.66370700  | 0.12535000  | 3.33853300  |
| P  | -0.94811500 | -0.03649700 | 1.47852600  |
| C  | -2.31928700 | -0.87656500 | 2.32256400  |
| C  | -2.22154300 | -1.33178600 | 3.64197800  |
| C  | -3.51153800 | -1.06407500 | 1.61149000  |
| C  | -3.30458100 | -1.97898600 | 4.23629300  |
| H  | -1.30313100 | -1.18613800 | 4.21497200  |
| C  | -4.59501600 | -1.70073300 | 2.21195300  |
| H  | -3.58439000 | -0.72114500 | 0.57635200  |
| C  | -4.48959900 | -2.16380600 | 3.52397100  |
| H  | -3.22200200 | -2.33903000 | 5.26414400  |
| H  | -5.52087600 | -1.84398200 | 1.65058100  |
| H  | -5.33509000 | -2.67110500 | 3.99403300  |
| C  | -1.26023000 | 1.74778000  | 1.73193900  |
| C  | -0.22681900 | 2.61461400  | 2.10415200  |
| C  | -2.52537300 | 2.27961800  | 1.45166200  |
| C  | -0.45083600 | 3.98936300  | 2.18057500  |
| H  | 0.76842500  | 2.23291100  | 2.33818600  |
| C  | -2.74723500 | 3.65172500  | 1.52795500  |
| H  | -3.34786500 | 1.62326000  | 1.16171200  |
| C  | -1.70855000 | 4.51136100  | 1.88662000  |
| H  | 0.36585200  | 4.65334000  | 2.47269600  |
| H  | -3.73771300 | 4.05178000  | 1.30029700  |
| H  | -1.88288700 | 5.58827500  | 1.94099000  |
| Ir | -0.32065700 | -0.70145100 | -0.65626400 |
| C  | -0.69797100 | -2.93423600 | -0.56095400 |
| C  | -1.57056900 | -2.29483900 | -1.53514200 |
| C  | -0.73200600 | -1.76510100 | -2.58000100 |
| C  | 0.64366500  | -2.73618400 | -0.96911300 |
| C  | 0.62856900  | -1.99067100 | -2.22014500 |
| C  | -1.15800500 | -3.74120800 | 0.61075500  |
| C  | -3.05491100 | -2.46607500 | -1.62723700 |
| C  | -1.21588000 | -1.14110400 | -3.84742400 |
| C  | 1.86759600  | -3.28580400 | -0.30755900 |
| C  | 1.82232900  | -1.67388800 | -3.06454200 |
| H  | -0.41887400 | -3.73934900 | 1.42342000  |
| H  | -1.31342300 | -4.78801400 | 0.30318700  |
| H  | -2.10910900 | -3.36854000 | 1.01245800  |
| H  | -3.54512300 | -1.56957400 | -2.03161600 |
| H  | -3.49908600 | -2.69003900 | -0.64894500 |
| H  | -3.29619100 | -3.30534800 | -2.30022300 |
| H  | -2.16948200 | -0.61708500 | -3.69944300 |
| H  | -1.37287300 | -1.92304900 | -4.60803000 |
| H  | -0.49035400 | -0.41962200 | -4.24647600 |
| H  | 2.13787500  | -4.25840400 | -0.74971300 |



|                       |             |             |             |
|-----------------------|-------------|-------------|-------------|
| H                     | 1.71316800  | -3.44039100 | 0.76898800  |
| H                     | 2.72874200  | -2.61669500 | -0.43705300 |
| H                     | 1.70236600  | -0.71519400 | -3.58807000 |
| H                     | 1.97348000  | -2.45716000 | -3.82485200 |
| H                     | 2.73919000  | -1.61927300 | -2.46270900 |
| <b>H<sub>2</sub>O</b> |             |             |             |
| O                     | 0.00000000  | 0.00000000  | 0.12021700  |
| H                     | 0.00000000  | 0.75355100  | -0.48086700 |
| H                     | 0.00000000  | -0.75355100 | -0.48086700 |
| <b>I<sup>Ir</sup></b> |             |             |             |
| P                     | -2.27861600 | 0.15450300  | -0.87102700 |
| N                     | 0.54201600  | 0.00420000  | -1.21850000 |
| N                     | 2.50783200  | -1.19294600 | -0.94254900 |
| N                     | 2.62774200  | 1.07772000  | -1.56559300 |
| C                     | 0.53346800  | -2.38155300 | 1.57964400  |
| C                     | 0.69581900  | -1.10700600 | 2.15372400  |
| C                     | -0.63698900 | -0.54343800 | 2.36834000  |
| C                     | -1.60890900 | -1.54873500 | 2.02951500  |
| C                     | -0.90014100 | -2.63881000 | 1.44884600  |
| C                     | 1.58833900  | -3.37094500 | 1.22008100  |
| H                     | 2.59001900  | -2.92636100 | 1.23304900  |
| H                     | 1.41525700  | -3.79097100 | 0.22001200  |
| H                     | 1.56572800  | -4.20210300 | 1.94349000  |
| C                     | 1.97371500  | -0.43922500 | 2.52985300  |
| H                     | 2.10353100  | -0.48271400 | 3.62310300  |
| H                     | 1.97873200  | 0.62156800  | 2.24391900  |
| H                     | 2.83513900  | -0.93073700 | 2.06313000  |
| C                     | -0.91016600 | 0.76861300  | 3.02560200  |
| H                     | -1.89839800 | 1.15949400  | 2.74743600  |
| H                     | -0.15229300 | 1.51440000  | 2.74783100  |
| H                     | -0.88290400 | 0.65348300  | 4.12121800  |
| C                     | -3.08079900 | -1.48390100 | 2.27831200  |
| H                     | -3.31912600 | -2.04468100 | 3.19577900  |
| H                     | -3.65835100 | -1.92633300 | 1.45535100  |
| H                     | -3.41584600 | -0.45001100 | 2.42504700  |
| C                     | -1.47054900 | -3.94169200 | 0.99647000  |
| H                     | -0.99882400 | -4.28385200 | 0.06453300  |
| H                     | -2.55567200 | -3.88263700 | 0.84638100  |
| H                     | -1.27962400 | -4.70854600 | 1.76482600  |
| C                     | -1.50502000 | 0.63570600  | -2.45804600 |
| H                     | -1.64419600 | -0.24817800 | -3.10008300 |
| H                     | -2.01843400 | 1.48535600  | -2.93063300 |
| C                     | -0.02471800 | 0.90297800  | -2.24235000 |
| H                     | 0.51016500  | 0.76356200  | -3.19352000 |
| H                     | 0.11785100  | 1.95847300  | -1.96283600 |
| C                     | -2.87067300 | 1.63973500  | 0.00191000  |
| C                     | -2.07689600 | 2.79520600  | -0.00945900 |
| H                     | -1.16269200 | 2.84018300  | -0.60388100 |
| C                     | -2.43631700 | 3.90198400  | 0.75579000  |
| H                     | -1.81154900 | 4.79767300  | 0.73383100  |
| C                     | -3.58561400 | 3.86477600  | 1.54574400  |
| H                     | -3.86514000 | 4.73253500  | 2.14727200  |
| C                     | -4.37838500 | 2.71787900  | 1.56225000  |
| H                     | -5.28149500 | 2.68301000  | 2.17530700  |
| C                     | -4.02451200 | 1.60866100  | 0.79501700  |
| H                     | -4.65495300 | 0.71793400  | 0.82109400  |

|    |             |             |             |
|----|-------------|-------------|-------------|
| C  | -3.73293500 | -0.82667400 | -1.34556800 |
| C  | -3.61700600 | -2.22007200 | -1.39214600 |
| H  | -2.68439000 | -2.69594200 | -1.08335400 |
| C  | -4.68362400 | -2.99935900 | -1.83636700 |
| H  | -4.58586900 | -4.08669400 | -1.86506400 |
| C  | -5.86920600 | -2.38869900 | -2.24352300 |
| H  | -6.70732400 | -2.99835400 | -2.58861200 |
| C  | -5.98326500 | -0.99798900 | -2.21717800 |
| H  | -6.90680800 | -0.51728800 | -2.54683600 |
| C  | -4.91877600 | -0.21535300 | -1.77466500 |
| H  | -5.01849200 | 0.87258400  | -1.76618400 |
| C  | 1.93782500  | -0.07219000 | -1.21013600 |
| C  | 3.88623600  | -1.30855200 | -0.73632600 |
| C  | 4.63634100  | -0.43502700 | 0.07595000  |
| H  | 4.14803300  | 0.41604700  | 0.55512000  |
| C  | 5.99384700  | -0.65224600 | 0.28869200  |
| H  | 6.54771600  | 0.04126900  | 0.92852100  |
| C  | 6.66526800  | -1.73676400 | -0.29301600 |
| C  | 5.91462700  | -2.60704200 | -1.09122800 |
| H  | 6.40426900  | -3.46751400 | -1.55620900 |
| C  | 4.55200000  | -2.40544900 | -1.30242600 |
| H  | 3.97848800  | -3.10153800 | -1.91893600 |
| C  | 8.13545600  | -1.95227700 | -0.04928500 |
| H  | 8.72085300  | -1.06002800 | -0.32205800 |
| H  | 8.52015200  | -2.80092900 | -0.63253100 |
| H  | 8.33748300  | -2.15691200 | 1.01452700  |
| C  | 2.40901300  | 2.36696100  | -1.04851400 |
| C  | 1.61835200  | 2.60452100  | 0.08137900  |
| H  | 1.13175600  | 1.77270000  | 0.59213600  |
| C  | 1.43014700  | 3.90472300  | 0.54874900  |
| H  | 0.80017000  | 4.06083100  | 1.42892900  |
| C  | 2.03077000  | 5.00349900  | -0.07191200 |
| C  | 2.83664100  | 4.74913000  | -1.19141000 |
| H  | 3.32569300  | 5.58321200  | -1.70250600 |
| C  | 3.02067700  | 3.46011500  | -1.67857600 |
| H  | 3.64078800  | 3.28983600  | -2.56228700 |
| C  | 1.83362600  | 6.40660700  | 0.43736000  |
| H  | 1.10166600  | 6.43730900  | 1.25718500  |
| H  | 1.47639000  | 7.07510500  | -0.36152500 |
| H  | 2.77811600  | 6.83092600  | 0.81398500  |
| H  | 3.57137000  | 0.91674000  | -1.90520000 |
| Ir | -0.50554400 | -0.83572500 | 0.25200700  |

**Ir** · H<sub>2</sub>O

|   |             |             |             |
|---|-------------|-------------|-------------|
| P | -2.26579800 | 0.01736600  | -0.89681800 |
| N | 0.56731200  | 0.12594500  | -1.08327000 |
| N | 2.57487000  | -0.98726900 | -0.83412600 |
| N | 2.61293400  | 1.31357500  | -1.30594800 |
| C | 0.68154200  | -1.98430700 | 1.89123600  |
| C | 0.61887700  | -0.66303900 | 2.37228900  |
| C | -0.79284800 | -0.28625500 | 2.46637900  |
| C | -1.58520400 | -1.44542600 | 2.15159700  |
| C | -0.68914900 | -2.45576400 | 1.69437000  |
| C | 1.89006700  | -2.83437400 | 1.69845000  |
| H | 2.81245100  | -2.24111500 | 1.68808800  |
| H | 1.82398100  | -3.39587500 | 0.75807000  |
| H | 1.95496200  | -3.55724800 | 2.52814400  |
| C | 1.76669600  | 0.20563100  | 2.75921600  |
| H | 1.91103100  | 0.16112200  | 3.85063000  |

|   |             |             |             |
|---|-------------|-------------|-------------|
| H | 1.59086500  | 1.25657600  | 2.49415800  |
| H | 2.69732400  | -0.12475100 | 2.28165400  |
| C | -1.29404200 | 1.00991800  | 3.01137800  |
| H | -2.30939800 | 1.23250000  | 2.65733400  |
| H | -0.63748400 | 1.84272900  | 2.72337600  |
| H | -1.31697800 | 0.96831600  | 4.11246500  |
| C | -3.06483900 | -1.57675600 | 2.31081500  |
| H | -3.28587600 | -2.01509600 | 3.29673700  |
| H | -3.50325200 | -2.23114800 | 1.54594300  |
| H | -3.56343300 | -0.60119900 | 2.26234200  |
| C | -1.01967100 | -3.84748600 | 1.26901400  |
| H | -0.46082000 | -4.11131700 | 0.35875100  |
| H | -2.09430900 | -3.97726700 | 1.08838000  |
| H | -0.72390900 | -4.55306700 | 2.06203400  |
| C | -1.44908500 | 0.47969500  | -2.47004300 |
| H | -1.46716800 | -0.44700100 | -3.06503300 |
| H | -2.01225500 | 1.24814800  | -3.01875500 |
| C | -0.01376600 | 0.90124900  | -2.19525400 |
| H | 0.58861100  | 0.74504200  | -3.10335000 |
| H | 0.01953500  | 1.98170400  | -1.98303400 |
| C | -3.06209800 | 1.48676100  | -0.17233400 |
| C | -2.39752300 | 2.71930500  | -0.23088800 |
| H | -1.46307700 | 2.82410300  | -0.78517900 |
| C | -2.91602200 | 3.82956400  | 0.43139200  |
| H | -2.39020100 | 4.78517300  | 0.37364600  |
| C | -4.09892200 | 3.72011700  | 1.16289700  |
| H | -4.50334300 | 4.59068600  | 1.68395600  |
| C | -4.76657700 | 2.49752700  | 1.22182400  |
| H | -5.69627400 | 2.40598900  | 1.78747000  |
| C | -4.25232600 | 1.38408500  | 0.55841700  |
| H | -4.78775600 | 0.43418800  | 0.61491500  |
| C | -3.58630600 | -1.13894500 | -1.36340100 |
| C | -3.35955400 | -2.51322700 | -1.23849900 |
| H | -2.42083000 | -2.86916700 | -0.81095600 |
| C | -4.32762500 | -3.42548700 | -1.65482800 |
| H | -4.14439200 | -4.49688700 | -1.54860300 |
| C | -5.52483300 | -2.96666400 | -2.20266000 |
| H | -6.28695500 | -3.67967000 | -2.52495300 |
| C | -5.74903100 | -1.59618100 | -2.34496300 |
| H | -6.68292000 | -1.23590600 | -2.78164300 |
| C | -4.78296600 | -0.68146500 | -1.93183600 |
| H | -4.96799200 | 0.38885000  | -2.05064100 |
| C | 1.96266500  | 0.12997700  | -1.04083000 |
| C | 3.95872400  | -1.09909400 | -0.64593500 |
| C | 4.71651200  | -0.25978500 | 0.19154300  |
| H | 4.23668400  | 0.56914100  | 0.71615700  |
| C | 6.07965200  | -0.48028400 | 0.36718400  |
| H | 6.64357200  | 0.18634000  | 1.02629600  |
| C | 6.74357400  | -1.53321500 | -0.27702400 |
| C | 5.98107300  | -2.37227100 | -1.09750900 |
| H | 6.46436300  | -3.20983000 | -1.60838100 |
| C | 4.61488500  | -2.16789100 | -1.27369700 |
| H | 4.02940800  | -2.84118300 | -1.90402800 |
| C | 8.22013500  | -1.74993500 | -0.07787400 |
| H | 8.79646600  | -0.85405400 | -0.35821900 |
| H | 8.58794900  | -2.59135200 | -0.68207100 |
| H | 8.45245500  | -1.96603400 | 0.97720900  |
| C | 2.23895300  | 2.62051500  | -0.94655400 |
| C | 1.29499200  | 2.89874800  | 0.04778800  |

|    |             |             |             |
|----|-------------|-------------|-------------|
| H  | 0.79778700  | 2.08111000  | 0.57036700  |
| C  | 0.97659300  | 4.21872700  | 0.36322300  |
| H  | 0.23218500  | 4.40725500  | 1.14192900  |
| C  | 1.59062300  | 5.29813100  | -0.27948000 |
| C  | 2.54789400  | 5.00371200  | -1.26048800 |
| H  | 3.05341700  | 5.82152600  | -1.78152800 |
| C  | 2.86510900  | 3.69249600  | -1.59674400 |
| H  | 3.60669100  | 3.48894700  | -2.37353700 |
| C  | 1.23369900  | 6.72307900  | 0.04894900  |
| H  | 0.63510600  | 6.78660000  | 0.96898700  |
| H  | 0.64796400  | 7.18218800  | -0.76417800 |
| H  | 2.13493000  | 7.33991400  | 0.18511300  |
| H  | 3.58425100  | 1.21531300  | -1.58708200 |
| Ir | -0.46971300 | -0.70578600 | 0.39282400  |
| O  | 1.20958300  | -3.36189500 | -1.53086900 |
| H  | 1.65145800  | -2.52266800 | -1.26126400 |
| H  | 0.45835000  | -3.05552200 | -2.04927800 |

**Ir** · MeOH

|   |             |             |             |
|---|-------------|-------------|-------------|
| P | -2.30255700 | 0.03783800  | -0.84164600 |
| N | 0.52322100  | 0.17689600  | -1.06208500 |
| N | 2.45934900  | -1.03853300 | -0.78573200 |
| N | 2.62741000  | 1.20844400  | -1.45652500 |
| C | 0.69442400  | -1.63301300 | 2.10924000  |
| C | 0.61902100  | -0.27256400 | 2.46170800  |
| C | -0.79756400 | 0.09275600  | 2.53715600  |
| C | -1.57667200 | -1.10108900 | 2.34048800  |
| C | -0.67044200 | -2.13916900 | 1.97482700  |
| C | 1.91158300  | -2.48514600 | 2.00013100  |
| H | 2.82474900  | -1.88851600 | 1.89055800  |
| H | 1.83838200  | -3.17662600 | 1.15120000  |
| H | 2.00586600  | -3.08749600 | 2.91865100  |
| C | 1.76232300  | 0.63359800  | 2.76645000  |
| H | 1.94083400  | 0.64060600  | 3.85391500  |
| H | 1.56151500  | 1.66809700  | 2.45970300  |
| H | 2.68405400  | 0.29506100  | 2.27710300  |
| C | -1.31802600 | 1.42319300  | 2.97090900  |
| H | -2.33868600 | 1.59644100  | 2.60341100  |
| H | -0.67862700 | 2.23922700  | 2.60660900  |
| H | -1.33621900 | 1.47605500  | 4.07152800  |
| C | -3.05405600 | -1.23399900 | 2.51938700  |
| H | -3.26666800 | -1.57357300 | 3.54528400  |
| H | -3.48800500 | -1.96621000 | 1.82569300  |
| H | -3.56489700 | -0.27404400 | 2.37579000  |
| C | -0.98347000 | -3.56492700 | 1.66901300  |
| H | -0.45457900 | -3.88040600 | 0.75631600  |
| H | -2.06085300 | -3.72930000 | 1.54496100  |
| H | -0.63884100 | -4.20307100 | 2.49855200  |
| C | -1.50031600 | 0.47108800  | -2.43324300 |
| H | -1.48658500 | -0.46894400 | -3.00612800 |
| H | -2.08535000 | 1.21013300  | -2.99881700 |
| C | -0.07925100 | 0.94209300  | -2.16707900 |
| H | 0.52137000  | 0.81425600  | -3.07984900 |
| H | -0.07803900 | 2.02223100  | -1.94676700 |
| C | -3.17649900 | 1.50397100  | -0.20261500 |
| C | -2.51412700 | 2.74003500  | -0.21516900 |
| H | -1.52970500 | 2.83912000  | -0.67814400 |
| C | -3.09809200 | 3.85547900  | 0.37860500  |

|                       |             |             |             |
|-----------------------|-------------|-------------|-------------|
| H                     | -2.57512300 | 4.81406400  | 0.35858400  |
| C                     | -4.34315300 | 3.74680400  | 0.99998400  |
| H                     | -4.79857400 | 4.62114300  | 1.47014100  |
| C                     | -5.00515900 | 2.52028200  | 1.01699600  |
| H                     | -5.98073100 | 2.42939300  | 1.49945100  |
| C                     | -4.42682200 | 1.40113100  | 0.41734300  |
| H                     | -4.95672500 | 0.44662600  | 0.44092200  |
| C                     | -3.56522800 | -1.19133000 | -1.27827200 |
| C                     | -3.38459400 | -2.53503100 | -0.93944400 |
| H                     | -2.51469000 | -2.83476900 | -0.35428900 |
| C                     | -4.30814500 | -3.49296900 | -1.35688200 |
| H                     | -4.16074200 | -4.54101200 | -1.08766200 |
| C                     | -5.41106700 | -3.11098100 | -2.11858300 |
| H                     | -6.13429700 | -3.86068500 | -2.44716700 |
| C                     | -5.59026400 | -1.77095700 | -2.46837200 |
| H                     | -6.45077900 | -1.47175500 | -3.07063500 |
| C                     | -4.67047900 | -0.81161800 | -2.05343900 |
| H                     | -4.81648200 | 0.23461000  | -2.33409300 |
| C                     | 1.91215700  | 0.09738600  | -1.06995400 |
| C                     | 3.83307000  | -1.22465700 | -0.58629000 |
| C                     | 4.64978900  | -0.35738500 | 0.16305300  |
| H                     | 4.23279400  | 0.55813100  | 0.58736800  |
| C                     | 5.98798700  | -0.66525900 | 0.38986900  |
| H                     | 6.59685700  | 0.02307100  | 0.98348600  |
| C                     | 6.56923300  | -1.83623500 | -0.11583700 |
| C                     | 5.74902000  | -2.69876200 | -0.85206600 |
| H                     | 6.16597900  | -3.62746700 | -1.25171500 |
| C                     | 4.40604700  | -2.40666800 | -1.07720600 |
| H                     | 3.77000700  | -3.10414900 | -1.62701100 |
| C                     | 8.02038800  | -2.14764600 | 0.13707800  |
| H                     | 8.67622900  | -1.38539300 | -0.31328500 |
| H                     | 8.30115700  | -3.12359600 | -0.28368300 |
| H                     | 8.24263700  | -2.16729400 | 1.21569700  |
| C                     | 2.38536800  | 2.55863800  | -1.14747800 |
| C                     | 1.45577500  | 2.97615400  | -0.18783200 |
| H                     | 0.85953900  | 2.24167200  | 0.35372700  |
| C                     | 1.28771200  | 4.33356700  | 0.08363100  |
| H                     | 0.55382200  | 4.63114700  | 0.83802800  |
| C                     | 2.03849900  | 5.31484600  | -0.56983600 |
| C                     | 2.97400100  | 4.88155500  | -1.52000900 |
| H                     | 3.58343200  | 5.61863800  | -2.05035600 |
| C                     | 3.14416200  | 3.53309100  | -1.81144600 |
| H                     | 3.87650800  | 3.22239800  | -2.56121700 |
| C                     | 1.86099300  | 6.77961800  | -0.27149600 |
| H                     | 1.10971200  | 6.94138100  | 0.51462900  |
| H                     | 1.53770000  | 7.33264900  | -1.16774600 |
| H                     | 2.80549600  | 7.23538600  | 0.06508700  |
| H                     | 3.57191600  | 1.01570400  | -1.77703500 |
| O                     | 1.01619900  | -3.41146800 | -1.15785000 |
| H                     | 1.47137100  | -2.55687600 | -0.96944500 |
| C                     | 0.15401200  | -3.20562700 | -2.23746900 |
| H                     | -0.26312900 | -4.17477700 | -2.55436600 |
| H                     | -0.69937200 | -2.54502800 | -1.98910900 |
| H                     | 0.66814800  | -2.76433400 | -3.11357600 |
| Ir                    | -0.48774400 | -0.50632400 | 0.51218800  |
| <b>I<sup>Rh</sup></b> |             |             |             |
| Rh                    | -0.58337300 | -0.89781000 | 0.30907900  |

|   |             |             |             |
|---|-------------|-------------|-------------|
| P | -2.35611500 | 0.03247500  | -0.86722900 |
| N | 0.47529300  | -0.11897100 | -1.19146100 |
| N | 2.42277600  | -1.32519500 | -0.87351600 |
| N | 2.57308700  | 0.92563200  | -1.56415200 |
| C | 0.48753800  | -2.26011900 | 1.75254400  |
| C | 0.63737900  | -0.92857600 | 2.17849600  |
| C | -0.69835800 | -0.36487200 | 2.35221700  |
| C | -1.66115500 | -1.41569700 | 2.13608900  |
| C | -0.94178400 | -2.55273400 | 1.68309000  |
| C | 1.55144300  | -3.26810100 | 1.48627000  |
| H | 2.54971300  | -2.81641300 | 1.47581500  |
| H | 1.39301900  | -3.76897500 | 0.52156300  |
| H | 1.52441300  | -4.03901100 | 2.27359400  |
| C | 1.90937400  | -0.20696100 | 2.46073500  |
| H | 2.05442400  | -0.13865800 | 3.55098900  |
| H | 1.89404300  | 0.81867000  | 2.06812000  |
| H | 2.77019700  | -0.73437400 | 2.03456000  |
| C | -0.98316400 | 1.00387600  | 2.86902000  |
| H | -1.97980800 | 1.35427900  | 2.56906700  |
| H | -0.23510900 | 1.72521300  | 2.51272500  |
| H | -0.94205100 | 0.99608700  | 3.97059700  |
| C | -3.13018900 | -1.35080300 | 2.39806500  |
| H | -3.34451300 | -1.81773700 | 3.37234600  |
| H | -3.70785700 | -1.88797800 | 1.63343000  |
| H | -3.48777500 | -0.31536700 | 2.44035700  |
| C | -1.49475500 | -3.89843500 | 1.35820100  |
| H | -1.03285800 | -4.31323000 | 0.45080900  |
| H | -2.58358500 | -3.87574500 | 1.22675000  |
| H | -1.26936200 | -4.59070400 | 2.18588200  |
| C | -1.55755400 | 0.45361500  | -2.46093500 |
| H | -1.66540500 | -0.46100400 | -3.06530300 |
| H | -2.07990800 | 1.27060800  | -2.97996400 |
| C | -0.08685700 | 0.75945900  | -2.22865200 |
| H | 0.46040400  | 0.62338200  | -3.17382600 |
| H | 0.03046200  | 1.82325300  | -1.96444900 |
| C | -2.98940600 | 1.55386400  | -0.08922600 |
| C | -2.21064100 | 2.71928300  | -0.13111100 |
| H | -1.27879100 | 2.74836000  | -0.69755200 |
| C | -2.61011900 | 3.85821500  | 0.56397500  |
| H | -1.99571000 | 4.76009600  | 0.51867900  |
| C | -3.78662900 | 3.84574700  | 1.31355000  |
| H | -4.09683100 | 4.73819200  | 1.86153600  |
| C | -4.56794700 | 2.69175000  | 1.35629100  |
| H | -5.49395000 | 2.67625600  | 1.93505900  |
| C | -4.17389600 | 1.55052000  | 0.65871100  |
| H | -4.79757100 | 0.65553500  | 0.70300800  |
| C | -3.79293700 | -0.99013900 | -1.30809300 |
| C | -3.69083500 | -2.38025500 | -1.18742700 |
| H | -2.77873600 | -2.82296600 | -0.78209700 |
| C | -4.74472200 | -3.19994700 | -1.58886200 |
| H | -4.65795800 | -4.28391000 | -1.48801600 |
| C | -5.90341700 | -2.63355800 | -2.11818800 |
| H | -6.73135400 | -3.27407600 | -2.43045400 |
| C | -6.00462200 | -1.24798800 | -2.25513800 |
| H | -6.90775200 | -0.80346800 | -2.67880000 |
| C | -4.95356300 | -0.42575900 | -1.85564200 |
| H | -5.04311200 | 0.65703100  | -1.97236800 |
| C | 1.85960100  | -0.20507500 | -1.17406500 |
| C | 3.80169400  | -1.46299200 | -0.68636500 |

|   |            |             |             |
|---|------------|-------------|-------------|
| C | 4.60371500 | -0.57094100 | 0.04893100  |
| H | 4.16268500 | 0.32420300  | 0.49156500  |
| C | 5.96254300 | -0.82202500 | 0.23657600  |
| H | 6.55550400 | -0.11034800 | 0.81828200  |
| C | 6.58047200 | -1.95797000 | -0.29644000 |
| C | 5.77584200 | -2.85180900 | -1.01776800 |
| H | 6.22370000 | -3.75590600 | -1.44094800 |
| C | 4.41796500 | -2.61710700 | -1.20157900 |
| H | 3.80294200 | -3.32974600 | -1.75621700 |
| C | 8.05303300 | -2.21598500 | -0.11673900 |
| H | 8.50193800 | -1.51009800 | 0.59664000  |
| H | 8.59262700 | -2.11381700 | -1.07257300 |
| H | 8.24002400 | -3.23695300 | 0.25058700  |
| C | 2.42682500 | 2.22531600  | -1.05672200 |
| C | 1.49765700 | 2.56781300  | -0.06607200 |
| H | 0.82406200 | 1.81129200  | 0.33721100  |
| C | 1.41847100 | 3.87804700  | 0.40560900  |
| H | 0.68094900 | 4.11165800  | 1.17909600  |
| C | 2.25610600 | 4.88804800  | -0.07436400 |
| C | 3.18907500 | 4.53076600  | -1.05841700 |
| H | 3.86650000 | 5.29068700  | -1.45826800 |
| C | 3.27542100 | 3.23157000  | -1.54475800 |
| H | 4.01171500 | 2.98468400  | -2.31419600 |
| C | 2.16618100 | 6.30350700  | 0.43071000  |
| H | 1.44325000 | 6.39157600  | 1.25440000  |
| H | 1.84955800 | 6.99282300  | -0.36857800 |
| H | 3.14160900 | 6.66080600  | 0.79623100  |
| H | 3.50494900 | 0.72859900  | -1.91661900 |

**I<sup>Rh</sup> · H<sub>2</sub>O**

|   |             |             |             |
|---|-------------|-------------|-------------|
| P | -2.36719300 | 0.04022100  | -0.81255900 |
| N | 0.47278100  | 0.12828700  | -1.06475100 |
| N | 2.40120500  | -1.10143700 | -0.79339800 |
| N | 2.57425900  | 1.14935000  | -1.46178300 |
| C | 0.60250200  | -2.02018700 | 1.89086100  |
| C | 0.57729500  | -0.68726400 | 2.33167100  |
| C | -0.82235700 | -0.28234400 | 2.45115800  |
| C | -1.64739400 | -1.42946200 | 2.16861900  |
| C | -0.77972200 | -2.46615100 | 1.72891800  |
| C | 1.78600400  | -2.90810500 | 1.72313700  |
| H | 2.72741700  | -2.34709100 | 1.74702600  |
| H | 1.73512600  | -3.47109700 | 0.78283800  |
| H | 1.79909400  | -3.63591500 | 2.55132700  |
| C | 1.75261100  | 0.16218300  | 2.67313800  |
| H | 1.93865100  | 0.11280800  | 3.75827700  |
| H | 1.58403400  | 1.21640900  | 2.41737400  |
| H | 2.65769100  | -0.18331800 | 2.15834000  |
| C | -1.28401700 | 1.03148200  | 2.98232400  |
| H | -2.32237800 | 1.24477900  | 2.69775400  |
| H | -0.64716500 | 1.85243700  | 2.62459600  |
| H | -1.22726900 | 1.02079000  | 4.08322200  |
| C | -3.12559700 | -1.52747800 | 2.35650600  |
| H | -3.33672400 | -1.92973800 | 3.35993000  |
| H | -3.58925200 | -2.19773200 | 1.62080400  |
| H | -3.60768100 | -0.54511200 | 2.28540100  |
| C | -1.14280000 | -3.84565900 | 1.29953100  |
| H | -0.63258000 | -4.09592900 | 0.35643400  |
| H | -2.22596700 | -3.96888500 | 1.17610800  |

|   |             |             |             |
|---|-------------|-------------|-------------|
| H | -0.80303900 | -4.56463800 | 2.06265900  |
| C | -1.56042300 | 0.56338500  | -2.37372800 |
| H | -1.56381700 | -0.34597000 | -2.99532600 |
| H | -2.13828700 | 1.34032400  | -2.89533000 |
| C | -0.13062100 | 0.99432600  | -2.08607400 |
| H | 0.45452100  | 0.94266900  | -3.01689100 |
| H | -0.11896100 | 2.05429800  | -1.78320100 |
| C | -3.15006400 | 1.48848500  | -0.03122300 |
| C | -2.44348300 | 2.69935300  | 0.00912500  |
| H | -1.47880700 | 2.79910900  | -0.49131600 |
| C | -2.95856700 | 3.79249700  | 0.70115300  |
| H | -2.40035800 | 4.73104500  | 0.71910100  |
| C | -4.17872100 | 3.68770200  | 1.36951600  |
| H | -4.58007200 | 4.54453700  | 1.91514300  |
| C | -4.88542600 | 2.48666000  | 1.33572300  |
| H | -5.84262000 | 2.39752700  | 1.85392400  |
| C | -4.37612000 | 1.39111800  | 0.63900700  |
| H | -4.94312200 | 0.45829500  | 0.62466300  |
| C | -3.69019600 | -1.09715600 | -1.31766100 |
| C | -3.46526600 | -2.47361700 | -1.21126800 |
| H | -2.53147900 | -2.83774700 | -0.77896600 |
| C | -4.42592500 | -3.37889400 | -1.65986200 |
| H | -4.24358000 | -4.45190400 | -1.56979600 |
| C | -5.61298700 | -2.91102300 | -2.22159000 |
| H | -6.36852300 | -3.61867000 | -2.57025600 |
| C | -5.83478600 | -1.53823300 | -2.34604700 |
| H | -6.75993800 | -1.17095300 | -2.79539700 |
| C | -4.87653600 | -0.63046500 | -1.90096700 |
| H | -5.05828400 | 0.44170800  | -2.00855500 |
| C | 1.84827200  | 0.03913300  | -1.07322700 |
| C | 3.77368700  | -1.27812600 | -0.58541300 |
| C | 4.59844300  | -0.38883100 | 0.13138500  |
| H | 4.18719600  | 0.53810600  | 0.53589300  |
| C | 5.94155000  | -0.68392100 | 0.34681500  |
| H | 6.55509900  | 0.02544900  | 0.91024000  |
| C | 6.52354600  | -1.86454800 | -0.13467300 |
| C | 5.69593000  | -2.75361000 | -0.82974200 |
| H | 6.11090600  | -3.69249300 | -1.20732900 |
| C | 4.34887100  | -2.47360600 | -1.04433400 |
| H | 3.70766300  | -3.19067000 | -1.56183700 |
| C | 7.98203700  | -2.15634300 | 0.09848700  |
| H | 8.62136100  | -1.39462900 | -0.37592200 |
| H | 8.26645100  | -3.13600000 | -0.31122500 |
| H | 8.22380400  | -2.15589200 | 1.17316000  |
| C | 2.37214100  | 2.48435000  | -1.07410500 |
| C | 1.49053600  | 2.85832800  | -0.05246000 |
| H | 0.90797200  | 2.09755600  | 0.46855400  |
| C | 1.34382000  | 4.20071400  | 0.29355500  |
| H | 0.64692800  | 4.46344100  | 1.09457600  |
| C | 2.06958100  | 5.21000700  | -0.34639400 |
| C | 2.96090200  | 4.81984400  | -1.35558300 |
| H | 3.55046200  | 5.57990800  | -1.87594600 |
| C | 3.10988600  | 3.48630300  | -1.72033000 |
| H | 3.80547300  | 3.21015600  | -2.51716800 |
| C | 1.89672600  | 6.66072200  | 0.01660600  |
| H | 1.30840100  | 6.77662100  | 0.93818000  |
| H | 1.37579500  | 7.21073800  | -0.78411700 |
| H | 2.86834600  | 7.15551500  | 0.16779000  |
| H | 3.50682900  | 0.95068200  | -1.81152100 |



|    |             |             |             |
|----|-------------|-------------|-------------|
| O  | 1.02753200  | -3.48477700 | -1.41351800 |
| H  | 1.44309400  | -2.61762300 | -1.18491200 |
| H  | 0.99001600  | -3.47510000 | -2.37552600 |
| Rh | -0.55783300 | -0.74812700 | 0.41039900  |

**I<sup>Rh</sup>**·MeOH

|   |             |             |             |
|---|-------------|-------------|-------------|
| P | -2.35868900 | 0.00506400  | -0.78114900 |
| N | 0.47778400  | 0.12106400  | -1.01188800 |
| N | 2.40944100  | -1.08958400 | -0.69647300 |
| N | 2.57917400  | 1.13948200  | -1.43319300 |
| C | 0.63956600  | -1.68044800 | 2.13116600  |
| C | 0.58527400  | -0.31137300 | 2.44380200  |
| C | -0.82383400 | 0.06932800  | 2.53528000  |
| C | -1.62157700 | -1.11833800 | 2.37049500  |
| C | -0.73030000 | -2.17375900 | 2.03344300  |
| C | 1.84472600  | -2.54938200 | 2.03527500  |
| H | 2.76639100  | -1.96616600 | 1.92652000  |
| H | 1.76694900  | -3.25015600 | 1.19426300  |
| H | 1.92341400  | -3.14358700 | 2.96089900  |
| C | 1.75185800  | 0.57999500  | 2.69713000  |
| H | 2.07056300  | 0.47329400  | 3.74668900  |
| H | 1.51091900  | 1.63695500  | 2.53007800  |
| H | 2.60467600  | 0.30824000  | 2.06197600  |
| C | -1.32276400 | 1.41978600  | 2.92133400  |
| H | -2.36437300 | 1.57230800  | 2.60955300  |
| H | -0.70910400 | 2.21510800  | 2.47620200  |
| H | -1.27245300 | 1.53271800  | 4.01661900  |
| C | -3.09684800 | -1.23554000 | 2.57466900  |
| H | -3.29213800 | -1.60364300 | 3.59421100  |
| H | -3.55550400 | -1.94119800 | 1.86905400  |
| H | -3.59645500 | -0.26471100 | 2.47215300  |
| C | -1.05892100 | -3.59738500 | 1.74410200  |
| H | -0.57531600 | -3.91401200 | 0.80636900  |
| H | -2.14054500 | -3.76826700 | 1.68281800  |
| H | -0.65962700 | -4.23342500 | 2.55070500  |
| C | -1.54560000 | 0.44766000  | -2.36489200 |
| H | -1.52648800 | -0.48985500 | -2.94198600 |
| H | -2.13062500 | 1.18730100  | -2.93058400 |
| C | -0.12758200 | 0.92054900  | -2.08629300 |
| H | 0.46892300  | 0.83319200  | -3.00703100 |
| H | -0.13714800 | 1.99407000  | -1.83483200 |
| C | -3.22527800 | 1.47180900  | -0.13587700 |
| C | -2.57024300 | 2.71162700  | -0.16176800 |
| H | -1.59549200 | 2.81666700  | -0.64253500 |
| C | -3.15099400 | 3.82606200  | 0.43781500  |
| H | -2.63266100 | 4.78690100  | 0.40708100  |
| C | -4.38607900 | 3.71362000  | 1.07747000  |
| H | -4.83897900 | 4.58706700  | 1.55169200  |
| C | -5.04260100 | 2.48408600  | 1.10585400  |
| H | -6.01162700 | 2.39019900  | 1.60080200  |
| C | -4.46742600 | 1.36616000  | 0.50166100  |
| H | -4.99402300 | 0.41010700  | 0.53362100  |
| C | -3.62702600 | -1.21712600 | -1.22325200 |
| C | -3.42908200 | -2.56288700 | -0.89984400 |
| H | -2.54590500 | -2.86077200 | -0.33303400 |
| C | -4.35074200 | -3.52588900 | -1.30973600 |
| H | -4.18924700 | -4.57491900 | -1.05266000 |
| C | -5.47057600 | -3.14678600 | -2.04783300 |

|    |             |             |             |
|----|-------------|-------------|-------------|
| H  | -6.19315100 | -3.89995000 | -2.36986800 |
| C  | -5.66801900 | -1.80520100 | -2.38153200 |
| H  | -6.54228200 | -1.50869900 | -2.96505500 |
| C  | -4.74967700 | -0.84079500 | -1.97454600 |
| H  | -4.91163400 | 0.20656900  | -2.24149600 |
| C  | 1.85664900  | 0.03968500  | -1.01438100 |
| C  | 3.78446200  | -1.26688100 | -0.50102800 |
| C  | 4.62195700  | -0.36195900 | 0.17950600  |
| H  | 4.22164600  | 0.58104100  | 0.55703800  |
| C  | 5.96507800  | -0.66005000 | 0.39016100  |
| H  | 6.58966400  | 0.06091800  | 0.92602900  |
| C  | 6.53326500  | -1.85871100 | -0.06238900 |
| C  | 5.69339400  | -2.76055900 | -0.72560100 |
| H  | 6.09891500  | -3.71152000 | -1.08250700 |
| C  | 4.34593400  | -2.47768600 | -0.93445300 |
| H  | 3.69584500  | -3.20162900 | -1.43133800 |
| C  | 7.99072200  | -2.15611400 | 0.16981500  |
| H  | 8.63258200  | -1.39105900 | -0.29531800 |
| H  | 8.27354600  | -3.13265800 | -0.24823500 |
| H  | 8.22988000  | -2.16681600 | 1.24516600  |
| C  | 2.36099200  | 2.49217800  | -1.12383400 |
| C  | 1.43677700  | 2.92499000  | -0.16516300 |
| H  | 0.82836900  | 2.19769700  | 0.37264000  |
| C  | 1.28435100  | 4.28526400  | 0.10119200  |
| H  | 0.55149900  | 4.59520000  | 0.85173400  |
| C  | 2.04635400  | 5.25546300  | -0.55599300 |
| C  | 2.97870900  | 4.80722800  | -1.50230200 |
| H  | 3.59706200  | 5.53498200  | -2.03531900 |
| C  | 3.13364400  | 3.45575000  | -1.78828900 |
| H  | 3.86263900  | 3.13374300  | -2.53655200 |
| C  | 1.88101700  | 6.72391400  | -0.26819300 |
| H  | 1.13210700  | 6.89749700  | 0.51771500  |
| H  | 1.56010600  | 7.27268300  | -1.16800800 |
| H  | 2.82932200  | 7.17540600  | 0.06338300  |
| H  | 3.51533400  | 0.93408500  | -1.76948800 |
| O  | 0.98314600  | -3.46268100 | -1.11701700 |
| H  | 1.43307500  | -2.60680800 | -0.91508800 |
| Rh | -0.54468300 | -0.58456000 | 0.54964100  |
| C  | 0.12732100  | -3.24871500 | -2.20021100 |
| H  | -0.28078600 | -4.21682400 | -2.53216700 |
| H  | -0.73323900 | -2.59728100 | -1.95116600 |
| H  | 0.64519700  | -2.79349200 | -3.06688700 |

## II<sup>Ir</sup>

|   |             |             |             |
|---|-------------|-------------|-------------|
| P | 2.24742400  | 0.33311100  | 0.87491600  |
| N | -0.63735000 | 0.56508400  | 0.74793700  |
| N | -2.17498100 | -1.12873400 | 0.87048500  |
| N | -2.82091600 | 1.00919900  | 1.53607000  |
| C | -0.18747500 | -1.88649400 | -2.14305300 |
| C | -0.63291700 | -0.55911600 | -2.36868000 |
| C | 0.52766200  | 0.30121900  | -2.52232400 |
| C | 1.69362000  | -0.54285400 | -2.45226200 |
| C | 1.26752300  | -1.88418200 | -2.16054700 |
| C | -1.02091900 | -3.09457600 | -1.87400100 |
| H | -2.08657800 | -2.84355600 | -1.79325100 |
| H | -0.70264300 | -3.56481700 | -0.93086100 |
| H | -0.89967700 | -3.83145500 | -2.68283700 |
| C | -2.04993200 | -0.10627600 | -2.47640800 |

|   |             |             |             |
|---|-------------|-------------|-------------|
| H | -2.34092600 | -0.06647600 | -3.53819700 |
| H | -2.18305700 | 0.90058100  | -2.06229700 |
| H | -2.73644800 | -0.79053200 | -1.96296000 |
| C | 0.48325800  | 1.73963500  | -2.92963200 |
| H | 1.42722400  | 2.25029800  | -2.69919000 |
| H | -0.32852500 | 2.27415700  | -2.41536500 |
| H | 0.30636300  | 1.82888900  | -4.01374800 |
| C | 3.09712200  | -0.13316300 | -2.75229600 |
| H | 3.31164000  | -0.36093700 | -3.80881900 |
| H | 3.82193100  | -0.68189100 | -2.13658300 |
| H | 3.25491800  | 0.94142600  | -2.59984600 |
| C | 2.12089800  | -3.10783100 | -2.07958100 |
| H | 1.75402700  | -3.78820100 | -1.29846800 |
| H | 3.16615100  | -2.85608300 | -1.85629800 |
| H | 2.10315400  | -3.65180300 | -3.03781400 |
| C | 1.25898400  | 1.34755500  | 2.05314600  |
| H | 1.05435300  | 0.70400100  | 2.92295100  |
| H | 1.82120500  | 2.22746400  | 2.39654400  |
| C | -0.05779900 | 1.73943800  | 1.38647100  |
| H | -0.73018600 | 2.15282900  | 2.15102100  |
| H | 0.10834000  | 2.53328300  | 0.63922800  |
| C | 3.45680100  | 1.46421500  | 0.11316800  |
| C | 2.99854900  | 2.67018500  | -0.43437900 |
| H | 1.94213700  | 2.94026500  | -0.36639700 |
| C | 3.88175900  | 3.52630500  | -1.08649100 |
| H | 3.51514100  | 4.46497100  | -1.50766200 |
| C | 5.22918000  | 3.18097700  | -1.20632300 |
| H | 5.92144200  | 3.84975300  | -1.72266800 |
| C | 5.68975700  | 1.98310300  | -0.66267300 |
| H | 6.74354200  | 1.70997900  | -0.75123100 |
| C | 4.80895200  | 1.12675100  | -0.00154600 |
| H | 5.18317700  | 0.19043900  | 0.41821600  |
| C | 3.24493900  | -0.80290700 | 1.88764700  |
| C | 3.46819800  | -2.11115700 | 1.44360400  |
| H | 3.01021600  | -2.45469700 | 0.51384700  |
| C | 4.26109700  | -2.97849800 | 2.19526300  |
| H | 4.42924300  | -3.99935400 | 1.84560400  |
| C | 4.83124800  | -2.54365900 | 3.39050200  |
| H | 5.44969200  | -3.22424600 | 3.98013400  |
| C | 4.61181700  | -1.23877800 | 3.83691300  |
| H | 5.05937600  | -0.89660200 | 4.77257800  |
| C | 3.82334800  | -0.36862900 | 3.08861400  |
| H | 3.66675100  | 0.65448400  | 3.43997400  |
| C | -1.86047100 | 0.17490900  | 1.03648900  |
| C | -3.43304300 | -1.71795900 | 0.67975600  |
| C | -4.52412300 | -1.05386500 | 0.10433200  |
| H | -4.44277000 | -0.01060700 | -0.20355200 |
| C | -5.72596800 | -1.73133900 | -0.10068600 |
| H | -6.56216700 | -1.19123700 | -0.55312500 |
| C | -5.88083200 | -3.07880100 | 0.23860700  |
| C | -4.77582100 | -3.73419600 | 0.79989700  |
| H | -4.85695300 | -4.79027400 | 1.07232400  |
| C | -3.57529100 | -3.07066200 | 1.02302700  |
| H | -2.72737200 | -3.60081800 | 1.46348500  |
| C | -7.18274000 | -3.80321300 | 0.02342300  |
| H | -7.87312500 | -3.21296000 | -0.59579600 |
| H | -7.68615800 | -4.00741800 | 0.98246800  |
| H | -7.02482800 | -4.77366800 | -0.47161600 |
| C | -3.09695300 | 2.33958800  | 1.16357500  |

|    |             |             |             |
|----|-------------|-------------|-------------|
| C  | -2.56482300 | 2.93531100  | 0.01647400  |
| H  | -1.88649400 | 2.37812000  | -0.62960200 |
| C  | -2.90396200 | 4.24754800  | -0.31092900 |
| H  | -2.47480700 | 4.69070500  | -1.21386900 |
| C  | -3.77925200 | 5.00040700  | 0.47673500  |
| C  | -4.31248400 | 4.38413700  | 1.61773400  |
| H  | -5.00468300 | 4.93989500  | 2.25642900  |
| C  | -3.97754300 | 3.08010100  | 1.96311600  |
| H  | -4.40238200 | 2.62326200  | 2.86071400  |
| C  | -4.13484300 | 6.42098400  | 0.12849500  |
| H  | -3.73357300 | 6.70696900  | -0.85414800 |
| H  | -3.73082100 | 7.12535000  | 0.87352000  |
| H  | -5.22588300 | 6.56653200  | 0.10588700  |
| H  | -3.55349600 | 0.55359100  | 2.07196700  |
| H  | -1.32353800 | -1.74351000 | 0.92055600  |
| O  | 0.27423700  | -2.13721400 | 0.85386800  |
| H  | 0.80457500  | -2.10168800 | 1.65612800  |
| Ir | 0.64577700  | -0.60347400 | -0.52343600 |

## II<sup>Rh</sup>

|    |             |             |             |
|----|-------------|-------------|-------------|
| Rh | 0.70377800  | -0.65491000 | -0.57190300 |
| P  | 2.31414800  | 0.27474100  | 0.81111400  |
| N  | -0.57466000 | 0.52802200  | 0.65937800  |
| N  | -2.08948200 | -1.18255100 | 0.75164700  |
| N  | -2.76045900 | 0.93116100  | 1.47347400  |
| C  | -0.10640800 | -1.91112400 | -2.19236800 |
| C  | -0.56809300 | -0.58502000 | -2.38599300 |
| C  | 0.58397100  | 0.28428900  | -2.52878700 |
| C  | 1.75638500  | -0.54442100 | -2.49719100 |
| C  | 1.34439100  | -1.88940200 | -2.21973500 |
| C  | -0.91967500 | -3.13586900 | -1.94586000 |
| H  | -1.99319000 | -2.91195700 | -1.89767200 |
| H  | -0.61663100 | -3.59698500 | -0.99292200 |
| H  | -0.75464300 | -3.87139900 | -2.74812200 |
| C  | -1.98719300 | -0.13612000 | -2.48243400 |
| H  | -2.22858000 | 0.08776900  | -3.53378900 |
| H  | -2.16223400 | 0.78069200  | -1.90505400 |
| H  | -2.68363000 | -0.90627500 | -2.12961000 |
| C  | 0.52148000  | 1.73716500  | -2.87356900 |
| H  | 1.46634500  | 2.24654800  | -2.64395100 |
| H  | -0.28487000 | 2.24249000  | -2.32366500 |
| H  | 0.32095800  | 1.86869900  | -3.94930600 |
| C  | 3.15067200  | -0.11554500 | -2.80758900 |
| H  | 3.35013600  | -0.32356700 | -3.87135200 |
| H  | 3.89128700  | -0.66856600 | -2.21507100 |
| H  | 3.30119200  | 0.95806000  | -2.64072300 |
| C  | 2.21094300  | -3.10271000 | -2.14554400 |
| H  | 1.85150700  | -3.79153300 | -1.36849300 |
| H  | 3.25479500  | -2.84289600 | -1.92584800 |
| H  | 2.19432300  | -3.64137200 | -3.10693600 |
| C  | 1.31424700  | 1.28362300  | 1.98598900  |
| H  | 1.09678900  | 0.63027700  | 2.84539800  |
| H  | 1.87952800  | 2.15466200  | 2.34746500  |
| C  | 0.00652200  | 1.69153400  | 1.31087800  |
| H  | -0.66799500 | 2.10921600  | 2.07215300  |
| H  | 0.18734500  | 2.48803500  | 0.57005200  |
| C  | 3.52992900  | 1.41506300  | 0.07148700  |
| C  | 3.09281600  | 2.65084800  | -0.42533800 |

|   |             |             |             |
|---|-------------|-------------|-------------|
| H | 2.04696400  | 2.94970700  | -0.32693300 |
| C | 3.98613700  | 3.50863300  | -1.06217000 |
| H | 3.63503300  | 4.47030600  | -1.44270200 |
| C | 5.32292800  | 3.13783200  | -1.21622700 |
| H | 6.02256400  | 3.80893900  | -1.71939400 |
| C | 5.76360400  | 1.91151500  | -0.72143400 |
| H | 6.80957200  | 1.61825100  | -0.83477200 |
| C | 4.87301600  | 1.05240700  | -0.07797800 |
| H | 5.23289500  | 0.09430800  | 0.30342100  |
| C | 3.30860400  | -0.86373600 | 1.82194100  |
| C | 3.52483500  | -2.17170500 | 1.37421700  |
| H | 3.05858000  | -2.51108500 | 0.44745900  |
| C | 4.31929400  | -3.04268100 | 2.12011100  |
| H | 4.48309500  | -4.06326800 | 1.76760800  |
| C | 4.89595800  | -2.61190300 | 3.31372200  |
| H | 5.51549800  | -3.29539400 | 3.89887200  |
| C | 4.68196500  | -1.30750300 | 3.76450000  |
| H | 5.13467400  | -0.96887800 | 4.69898600  |
| C | 3.89320900  | -0.43321600 | 3.02140000  |
| H | 3.74119400  | 0.58987200  | 3.37497800  |
| C | -1.78941800 | 0.12123300  | 0.94800600  |
| C | -3.34557000 | -1.78111200 | 0.58116900  |
| C | -4.44593800 | -1.12479400 | 0.01416100  |
| H | -4.36753900 | -0.08405000 | -0.30376700 |
| C | -5.64950400 | -1.80575600 | -0.16721700 |
| H | -6.49363900 | -1.27143100 | -0.61179200 |
| C | -5.79619600 | -3.15074400 | 0.18618100  |
| C | -4.68132400 | -3.79955700 | 0.73545300  |
| H | -4.75627700 | -4.85357000 | 1.01763400  |
| C | -3.47918000 | -3.13160100 | 0.93640000  |
| H | -2.62407300 | -3.65587800 | 1.36987400  |
| C | -7.10079400 | -3.87880500 | 0.00087900  |
| H | -7.79929900 | -3.30019900 | -0.62020000 |
| H | -7.59163400 | -4.06434300 | 0.97024800  |
| H | -6.94937000 | -4.85856400 | -0.47747300 |
| C | -3.07557400 | 2.25951100  | 1.13046000  |
| C | -2.52583200 | 2.91857300  | 0.02692200  |
| H | -1.79670400 | 2.41563800  | -0.60734000 |
| C | -2.91169500 | 4.22501500  | -0.27149200 |
| H | -2.46754500 | 4.71669300  | -1.14148100 |
| C | -3.84992600 | 4.91193100  | 0.50368400  |
| C | -4.39927100 | 4.23345400  | 1.60078900  |
| H | -5.14126600 | 4.73545600  | 2.22796700  |
| C | -4.02073000 | 2.93389800  | 1.91581200  |
| H | -4.46295300 | 2.42768800  | 2.77805700  |
| C | -4.25097500 | 6.32867100  | 0.19098200  |
| H | -3.88098400 | 6.64395900  | -0.79506100 |
| H | -3.84630700 | 7.02989000  | 0.93894300  |
| H | -5.34536800 | 6.44629500  | 0.19766500  |
| H | -3.48449400 | 0.44883900  | 1.99732100  |
| H | -1.22830200 | -1.79029500 | 0.78927100  |
| O | 0.35945800  | -2.20918800 | 0.76049700  |
| H | 0.80189800  | -2.09511900 | 1.60822100  |

### III<sup>Ir</sup>

|   |             |             |            |
|---|-------------|-------------|------------|
| P | -2.27878800 | 0.35887800  | 0.88314900 |
| N | 0.60278000  | 0.49408700  | 0.91534000 |
| N | 2.27431500  | -1.09642900 | 0.87963800 |

|   |             |             |             |
|---|-------------|-------------|-------------|
| N | 2.78207100  | 1.03980700  | 1.63133100  |
| C | 0.56725200  | -1.46999200 | -2.21642300 |
| C | -0.53283200 | -2.45064600 | -2.06594400 |
| C | -1.74530600 | -1.60682900 | -1.99590600 |
| C | -1.42610300 | -0.30912800 | -2.51570400 |
| C | 0.02906800  | -0.24246700 | -2.64988400 |
| C | 2.00609900  | -1.86887900 | -2.26558000 |
| H | 2.24468300  | -2.61798200 | -1.49871500 |
| H | 2.67949600  | -1.01405400 | -2.12448200 |
| H | 2.23556300  | -2.31899800 | -3.24582200 |
| C | -0.42867100 | -3.78482200 | -1.87947000 |
| C | -3.13130400 | -2.16103500 | -1.87843900 |
| H | -3.48198600 | -2.53404200 | -2.85513400 |
| H | -3.84186400 | -1.39732100 | -1.53272800 |
| H | -3.16856800 | -3.00067900 | -1.17057500 |
| C | -2.38299700 | 0.70232500  | -3.05654900 |
| H | -2.01734700 | 1.72712700  | -2.90394000 |
| H | -3.36953900 | 0.61746200  | -2.58290600 |
| H | -2.51295600 | 0.54618000  | -4.14009800 |
| C | 0.78338300  | 0.92479600  | -3.19443200 |
| H | 0.78123800  | 0.88577800  | -4.29624100 |
| H | 1.82945100  | 0.92065800  | -2.86091800 |
| H | 0.32138800  | 1.87565900  | -2.89473000 |
| C | -3.27967400 | -0.82367900 | 1.84653600  |
| C | -3.09160100 | -2.19926400 | 1.68611700  |
| H | -2.36702300 | -2.56310200 | 0.95339300  |
| C | -3.82363600 | -3.10572400 | 2.45401300  |
| H | -3.67126200 | -4.17891500 | 2.31972500  |
| C | -4.74716600 | -2.63908900 | 3.38737000  |
| H | -5.32193300 | -3.34724600 | 3.98858500  |
| C | -4.93808400 | -1.26555300 | 3.55532300  |
| H | -5.66051000 | -0.89831400 | 4.28752500  |
| C | -4.20854700 | -0.36025100 | 2.78932600  |
| H | -4.36717900 | 0.71346400  | 2.92294800  |
| C | -3.48700600 | 1.49356800  | 0.12172800  |
| C | -4.77686200 | 1.06493000  | -0.21137100 |
| H | -5.11558200 | 0.06452600  | 0.06788300  |
| C | -5.63980900 | 1.91322000  | -0.90543000 |
| H | -6.64475900 | 1.57033600  | -1.16145700 |
| C | -5.22255100 | 3.19256100  | -1.26972400 |
| H | -5.89988600 | 3.85555500  | -1.81269400 |
| C | -3.93793700 | 3.62537400  | -0.93724400 |
| H | -3.60643800 | 4.62709400  | -1.21966000 |
| C | -3.07158300 | 2.77920500  | -0.24953300 |
| H | -2.06141500 | 3.12306000  | -0.01391800 |
| C | -1.34311100 | 1.31669500  | 2.15186500  |
| H | -1.88910800 | 2.21509100  | 2.47311000  |
| H | -1.23686500 | 0.65217500  | 3.02288200  |
| C | 0.03546700  | 1.66200800  | 1.59507700  |
| H | -0.03700900 | 2.50751200  | 0.89150000  |
| H | 0.68240700  | 1.98857100  | 2.42204300  |
| C | 1.86114600  | 0.16582600  | 1.12969300  |
| C | 3.59676700  | -1.54239400 | 0.67204100  |
| C | 3.92044300  | -2.84806800 | 1.05699300  |
| H | 3.15939300  | -3.46825100 | 1.53526500  |
| C | 5.19122700  | -3.35915700 | 0.80791300  |
| H | 5.41762400  | -4.38556500 | 1.10910500  |
| C | 6.18002300  | -2.58850200 | 0.18472300  |
| C | 5.83865800  | -1.28565700 | -0.19912700 |

|    |             |             |             |
|----|-------------|-------------|-------------|
| H  | 6.58008600  | -0.66204700 | -0.70601500 |
| C  | 4.56719600  | -0.76559200 | 0.02618200  |
| H  | 4.33094600  | 0.24065300  | -0.32430300 |
| C  | 7.56400800  | -3.13232300 | -0.04724600 |
| H  | 8.03499500  | -2.67195800 | -0.92800600 |
| H  | 7.54813300  | -4.22191400 | -0.19549300 |
| H  | 8.21672000  | -2.92804700 | 0.81765400  |
| C  | 2.98170500  | 2.37090300  | 1.20485200  |
| C  | 3.75866700  | 3.21833200  | 2.00262100  |
| H  | 4.16554500  | 2.84670700  | 2.94612000  |
| C  | 4.01427400  | 4.52288700  | 1.59501200  |
| H  | 4.62864700  | 5.16651400  | 2.23063700  |
| C  | 3.49721700  | 5.02939200  | 0.39451300  |
| C  | 2.72470900  | 4.16799000  | -0.39088300 |
| H  | 2.31606500  | 4.52563100  | -1.33994200 |
| C  | 2.47069700  | 2.85290000  | -0.00396900 |
| H  | 1.87453600  | 2.20684900  | -0.65144800 |
| C  | 3.75477100  | 6.45410300  | -0.01694100 |
| H  | 3.15152100  | 7.15336800  | 0.58495200  |
| H  | 3.50164600  | 6.62040900  | -1.07366900 |
| H  | 4.81027800  | 6.72848300  | 0.13012100  |
| H  | 3.56971800  | 0.61979600  | 2.11687500  |
| H  | -1.31910700 | -4.40740000 | -1.76168900 |
| H  | 0.54165200  | -4.28695100 | -1.91287400 |
| H  | 1.55511700  | -1.83377200 | 0.91403800  |
| O  | 0.56613900  | -3.38620300 | 1.09296800  |
| H  | 0.15289200  | -3.49099000 | 0.21717000  |
| H  | -0.17797100 | -3.24868900 | 1.69300400  |
| Ir | -0.66611500 | -0.41254500 | -0.55434800 |

### III<sup>Rh</sup>

|    |             |             |             |
|----|-------------|-------------|-------------|
| Rh | -0.72119300 | -0.41095400 | -0.64387200 |
| P  | -2.32907700 | 0.29383300  | 0.82027600  |
| N  | 0.55377200  | 0.46358900  | 0.83566200  |
| N  | 2.19138000  | -1.14859900 | 0.80016600  |
| N  | 2.73800000  | 0.97406000  | 1.57615800  |
| C  | 0.48959000  | -1.40343000 | -2.32310700 |
| C  | -0.66479900 | -2.31833300 | -2.18118000 |
| C  | -1.84216500 | -1.42892200 | -2.17119700 |
| C  | -1.43407400 | -0.13561800 | -2.60795600 |
| C  | 0.02358600  | -0.13555700 | -2.70448300 |
| C  | 1.90399200  | -1.87921200 | -2.35162800 |
| H  | 2.09017100  | -2.64448100 | -1.58624300 |
| H  | 2.62129200  | -1.06314300 | -2.19848100 |
| H  | 2.12043600  | -2.33691200 | -3.33130900 |
| C  | -0.62939500 | -3.65228200 | -1.95704600 |
| C  | -3.25493800 | -1.91863300 | -2.11463500 |
| H  | -3.56438400 | -2.29999000 | -3.10193200 |
| H  | -3.95033300 | -1.11588900 | -1.83275500 |
| H  | -3.37172400 | -2.73863100 | -1.39293600 |
| C  | -2.31926100 | 0.97260600  | -3.07484400 |
| H  | -1.90802000 | 1.95623400  | -2.80901500 |
| H  | -3.32682300 | 0.89488400  | -2.64588900 |
| H  | -2.41426800 | 0.93323200  | -4.17253500 |
| C  | 0.84609500  | 1.01863500  | -3.17371400 |
| H  | 0.86564800  | 1.03794100  | -4.27585900 |
| H  | 1.88358600  | 0.94575900  | -2.82179700 |
| H  | 0.42616900  | 1.97541400  | -2.83350200 |

|   |             |             |             |
|---|-------------|-------------|-------------|
| C | -3.25325000 | -0.96758300 | 1.76100200  |
| C | -3.07990800 | -2.32251800 | 1.46167500  |
| H | -2.41707900 | -2.61301600 | 0.64248300  |
| C | -3.74899400 | -3.30048300 | 2.19897700  |
| H | -3.60735300 | -4.35608900 | 1.95674900  |
| C | -4.59701300 | -2.92629200 | 3.23968200  |
| H | -5.12189100 | -3.68985500 | 3.81826200  |
| C | -4.77657700 | -1.57478100 | 3.54335800  |
| H | -5.44079100 | -1.28056000 | 4.35896300  |
| C | -4.10939500 | -0.59825800 | 2.80817700  |
| H | -4.25841500 | 0.45768900  | 3.05005500  |
| C | -3.60284100 | 1.41196500  | 0.14775600  |
| C | -4.88762400 | 0.94889500  | -0.15930500 |
| H | -5.18109100 | -0.07284100 | 0.09278300  |
| C | -5.80417400 | 1.79153300  | -0.78882100 |
| H | -6.80481100 | 1.42208400  | -1.02414100 |
| C | -5.44700000 | 3.09979000  | -1.11277900 |
| H | -6.16691100 | 3.75828400  | -1.60394200 |
| C | -4.16836800 | 3.56711300  | -0.80516000 |
| H | -3.88374100 | 4.59149500  | -1.05547600 |
| C | -3.24827000 | 2.72659800  | -0.18344400 |
| H | -2.24341100 | 3.09853000  | 0.03222900  |
| C | -1.38514000 | 1.24499200  | 2.09149400  |
| H | -1.94107400 | 2.12749800  | 2.43949000  |
| H | -1.25061600 | 0.56682300  | 2.94810700  |
| C | -0.02193900 | 1.62233200  | 1.51565400  |
| H | -0.12649400 | 2.46308100  | 0.80920400  |
| H | 0.62650300  | 1.97018800  | 2.33383400  |
| C | 1.80045800  | 0.12362200  | 1.05858200  |
| C | 3.49832400  | -1.62599600 | 0.58530100  |
| C | 3.77996900  | -2.95263400 | 0.93228500  |
| H | 2.99719300  | -3.56124800 | 1.39059300  |
| C | 5.03479900  | -3.49634900 | 0.67314000  |
| H | 5.22678200  | -4.53793500 | 0.94486500  |
| C | 6.05083400  | -2.73958900 | 0.07680600  |
| C | 5.75243800  | -1.41587600 | -0.26889000 |
| H | 6.51596900  | -0.80166100 | -0.75407800 |
| C | 4.49683300  | -0.86191100 | -0.03308700 |
| H | 4.29335600  | 0.16106100  | -0.35466100 |
| C | 7.41798100  | -3.32038000 | -0.16583900 |
| H | 7.91298600  | -2.84011500 | -1.02247800 |
| H | 7.36753200  | -4.40188000 | -0.35935100 |
| H | 8.06884400  | -3.17482800 | 0.71220900  |
| C | 2.95695300  | 2.31480000  | 1.19702800  |
| C | 3.76495400  | 3.11468700  | 2.01389000  |
| H | 4.18056400  | 2.69652200  | 2.93413500  |
| C | 4.04163100  | 4.42912400  | 1.65487500  |
| H | 4.67983900  | 5.03334700  | 2.30553800  |
| C | 3.51669900  | 4.99461900  | 0.48450000  |
| C | 2.71425000  | 4.18089300  | -0.32122000 |
| H | 2.29792900  | 4.58429000  | -1.24848200 |
| C | 2.43730600  | 2.85711600  | 0.01752300  |
| H | 1.81763500  | 2.25030800  | -0.64487900 |
| C | 3.79573800  | 6.42989500  | 0.12657800  |
| H | 3.20185300  | 7.11512900  | 0.75352800  |
| H | 3.54553000  | 6.63926000  | -0.92329800 |
| H | 4.85497700  | 6.68335500  | 0.28377600  |
| H | 3.51276700  | 0.53352000  | 2.06345200  |
| H | -1.55099700 | -4.23020300 | -1.85190200 |



|   |             |             |             |
|---|-------------|-------------|-------------|
| H | 0.31679900  | -4.19938700 | -1.94846800 |
| H | 1.45314700  | -1.86351200 | 0.85694600  |
| O | 0.35358200  | -3.32792800 | 1.09586500  |
| H | -0.07607000 | -3.43935100 | 0.23080900  |
| H | -0.37587600 | -3.19634500 | 1.71497500  |

**IV<sup>2+</sup>**

|   |             |             |             |
|---|-------------|-------------|-------------|
| P | 2.26410900  | 0.36239100  | 0.82060700  |
| N | -0.64555800 | 0.52480500  | 0.77170300  |
| N | -2.25726800 | -1.10621900 | 0.74238200  |
| N | -2.83536900 | 1.01860600  | 1.50736500  |
| C | -0.20064000 | -1.95575200 | -2.11200200 |
| C | -0.65939500 | -0.63516600 | -2.34520600 |
| C | 0.49362200  | 0.23276000  | -2.51329000 |
| C | 1.66709100  | -0.59925500 | -2.44392200 |
| C | 1.25443800  | -1.94008100 | -2.13146300 |
| C | -1.01528300 | -3.17105300 | -1.82502700 |
| H | -2.09070300 | -2.95094400 | -1.81709900 |
| H | -0.73385800 | -3.57442400 | -0.83892800 |
| H | -0.82487600 | -3.94761900 | -2.58125200 |
| C | -2.07604300 | -0.18580000 | -2.47339800 |
| H | -2.29998800 | 0.00914400  | -3.53425900 |
| H | -2.25592500 | 0.74822500  | -1.92542400 |
| H | -2.78085400 | -0.94284200 | -2.11022700 |
| C | 0.42390200  | 1.65927000  | -2.95513500 |
| H | 1.37771300  | 2.17685800  | -2.79618400 |
| H | -0.35936200 | 2.20715700  | -2.41225900 |
| H | 0.18557900  | 1.71365300  | -4.02981400 |
| C | 3.06324200  | -0.18487900 | -2.77122600 |
| H | 3.27522500  | -0.46449300 | -3.81573200 |
| H | 3.80072300  | -0.68938900 | -2.13310800 |
| H | 3.20531700  | 0.89848000  | -2.67716500 |
| C | 2.11598400  | -3.15848600 | -2.05836300 |
| H | 1.79044200  | -3.82090000 | -1.24414700 |
| H | 3.17015200  | -2.89801400 | -1.89494000 |
| H | 2.05496800  | -3.72548200 | -3.00139700 |
| C | 1.28544000  | 1.30458100  | 2.06271400  |
| H | 1.14644800  | 0.63183700  | 2.92255800  |
| H | 1.82705400  | 2.19751500  | 2.40551900  |
| C | -0.07100200 | 1.67316100  | 1.46351000  |
| H | -0.73057200 | 2.01256300  | 2.27492300  |
| H | 0.03502400  | 2.52147400  | 0.76777400  |
| C | 3.33681800  | 1.58443300  | -0.01555800 |
| C | 2.76555000  | 2.74484000  | -0.55517600 |
| H | 1.69593600  | 2.93624300  | -0.45110500 |
| C | 3.55099900  | 3.66107800  | -1.24981300 |
| H | 3.09234000  | 4.56127100  | -1.66487800 |
| C | 4.91578400  | 3.42482500  | -1.42140200 |
| H | 5.53078900  | 4.14036800  | -1.97178700 |
| C | 5.49103500  | 2.27441400  | -0.88515700 |
| H | 6.55879500  | 2.08348100  | -1.01311300 |
| C | 4.70770700  | 1.35879400  | -0.18257000 |
| H | 5.17479600  | 0.46159600  | 0.22801900  |
| C | 3.43968500  | -0.67796300 | 1.73710600  |
| C | 3.76860800  | -1.94174600 | 1.23701600  |
| H | 3.27505300  | -2.31217700 | 0.33644300  |
| C | 4.70066500  | -2.73581800 | 1.90271200  |
| H | 4.95139700  | -3.72370000 | 1.51040900  |

|    |             |             |             |
|----|-------------|-------------|-------------|
| C  | 5.30229300  | -2.27211300 | 3.07254200  |
| H  | 6.02910100  | -2.89640000 | 3.59731400  |
| C  | 4.97447300  | -1.01223100 | 3.57602000  |
| H  | 5.44417900  | -0.64844100 | 4.49251300  |
| C  | 4.04872800  | -0.21280300 | 2.90875700  |
| H  | 3.80533400  | 0.77622800  | 3.30476000  |
| C  | -1.89491500 | 0.17167800  | 0.99023000  |
| C  | -3.54585200 | -1.63416900 | 0.56523200  |
| C  | -4.60104000 | -0.91307200 | -0.00740900 |
| H  | -4.45607600 | 0.11935100  | -0.32966800 |
| C  | -5.84311400 | -1.51956800 | -0.19024100 |
| H  | -6.65205800 | -0.93657100 | -0.63874600 |
| C  | -6.07108300 | -2.85276100 | 0.16587100  |
| C  | -4.99953800 | -3.56722400 | 0.71920900  |
| H  | -5.13958600 | -4.61392900 | 1.00307000  |
| C  | -3.75976700 | -2.97244100 | 0.92332700  |
| H  | -2.93991100 | -3.54537500 | 1.36316900  |
| C  | -7.41680600 | -3.50055400 | -0.02074900 |
| H  | -8.06838500 | -2.89609700 | -0.66771600 |
| H  | -7.93156100 | -3.62693800 | 0.94577900  |
| H  | -7.32085400 | -4.50113800 | -0.46894000 |
| C  | -3.06518100 | 2.36359500  | 1.15537600  |
| C  | -2.51196700 | 2.95391600  | 0.01593900  |
| H  | -1.85219100 | 2.38145400  | -0.63662700 |
| C  | -2.80590900 | 4.28070500  | -0.29685000 |
| H  | -2.36116200 | 4.71975700  | -1.19419200 |
| C  | -3.65800200 | 5.05242000  | 0.49773200  |
| C  | -4.21187000 | 4.44185700  | 1.63215300  |
| H  | -4.88603500 | 5.01321900  | 2.27633100  |
| C  | -3.92015100 | 3.12397200  | 1.96372000  |
| H  | -4.35993900 | 2.67099100  | 2.85595000  |
| C  | -3.97127000 | 6.48571200  | 0.16095800  |
| H  | -3.55304600 | 6.76968100  | -0.81515200 |
| H  | -3.55613100 | 7.17205700  | 0.91652500  |
| H  | -5.05785400 | 6.66020600  | 0.12923000  |
| H  | -3.60089600 | 0.56891900  | 2.00074500  |
| H  | -1.43620400 | -1.75900800 | 0.74058800  |
| O  | 0.17882700  | -2.19206900 | 0.85398200  |
| C  | 0.40112200  | -2.20526500 | 2.22325400  |
| H  | -0.05635300 | -1.34400700 | 2.75502800  |
| H  | -0.05038300 | -3.11796600 | 2.65797400  |
| H  | 1.47210400  | -2.22265000 | 2.49664700  |
| Ir | 0.63352300  | -0.64436000 | -0.50292300 |

#### IV<sup>Rh</sup>

|    |             |             |             |
|----|-------------|-------------|-------------|
| Rh | -0.67720100 | -0.69423900 | 0.55012000  |
| P  | -2.32459200 | 0.29571300  | -0.75138100 |
| N  | 0.58692200  | 0.49796700  | -0.68736300 |
| N  | 2.18026100  | -1.14691300 | -0.66917500 |
| N  | 2.77407200  | 0.96593800  | -1.45700600 |
| C  | 0.15165300  | -1.97581900 | 2.15555900  |
| C  | 0.60299600  | -0.65074900 | 2.37099700  |
| C  | -0.55489700 | 0.20606800  | 2.52920700  |
| C  | -1.72181100 | -0.63096300 | 2.48423600  |
| C  | -1.29926200 | -1.96627600 | 2.18235500  |
| C  | 0.96995100  | -3.19030800 | 1.88540800  |
| H  | 2.04609300  | -2.97551900 | 1.90999000  |
| H  | 0.71202900  | -3.58428600 | 0.88845300  |

|   |             |             |             |
|---|-------------|-------------|-------------|
| H | 0.75236500  | -3.97267300 | 2.62820700  |
| C | 2.01559700  | -0.19051600 | 2.49967700  |
| H | 2.22729500  | 0.03404200  | 3.55739100  |
| H | 2.19784500  | 0.73012900  | 1.92986300  |
| H | 2.72759400  | -0.95408700 | 2.16537900  |
| C | -0.49414200 | 1.64555100  | 2.92537800  |
| H | -1.45312400 | 2.15202400  | 2.76192200  |
| H | 0.28183200  | 2.18212000  | 2.36143200  |
| H | -0.24584300 | 1.73335400  | 3.99562600  |
| C | -3.11638400 | -0.22143800 | 2.81967200  |
| H | -3.31043200 | -0.48281400 | 3.87258400  |
| H | -3.85946300 | -0.74541800 | 2.20424700  |
| H | -3.26913200 | 0.85884600  | 2.70851800  |
| C | -2.15100000 | -3.18972400 | 2.10413300  |
| H | -1.82946100 | -3.83809000 | 1.27705700  |
| H | -3.21090400 | -2.93980700 | 1.96391400  |
| H | -2.06584900 | -3.76838400 | 3.03826900  |
| C | -1.34308000 | 1.24685600  | -1.98608200 |
| H | -1.18278000 | 0.57003200  | -2.83903200 |
| H | -1.89663300 | 2.12736400  | -2.34252200 |
| C | 0.00182400  | 1.63989600  | -1.37612900 |
| H | 0.65910200  | 1.99652700  | -2.18274200 |
| H | -0.12409300 | 2.48320400  | -0.67691900 |
| C | -3.41754900 | 1.51559300  | 0.05982000  |
| C | -2.87165500 | 2.70703000  | 0.55668500  |
| H | -1.80900000 | 2.92317300  | 0.43203100  |
| C | -3.67442600 | 3.62521300  | 1.22905500  |
| H | -3.23568500 | 4.55011800  | 1.60984600  |
| C | -5.03148000 | 3.36099300  | 1.41924900  |
| H | -5.66034500 | 4.07909900  | 1.95027300  |
| C | -5.58194200 | 2.17990000  | 0.92474400  |
| H | -6.64400800 | 1.96788500  | 1.06614000  |
| C | -4.78140000 | 1.26134900  | 0.24636500  |
| H | -5.22924800 | 0.34091400  | -0.13331600 |
| C | -3.47956300 | -0.76216300 | -1.67211300 |
| C | -3.77448500 | -2.03671600 | -1.17863200 |
| H | -3.26477900 | -2.40084200 | -0.28477400 |
| C | -4.68951300 | -2.84971000 | -1.84540300 |
| H | -4.91366800 | -3.84605200 | -1.45849500 |
| C | -5.30654000 | -2.39404500 | -3.01023400 |
| H | -6.01971900 | -3.03301500 | -3.53606000 |
| C | -5.01107100 | -1.12380000 | -3.50819400 |
| H | -5.49255400 | -0.76706100 | -4.42134100 |
| C | -4.10304100 | -0.30542300 | -2.83971000 |
| H | -3.88428700 | 0.69142500  | -3.23077500 |
| C | 1.82745200  | 0.13432700  | -0.92163900 |
| C | 3.46514200  | -1.68572100 | -0.49987400 |
| C | 4.53257000  | -0.97101500 | 0.05877900  |
| H | 4.40091100  | 0.06569100  | 0.37282800  |
| C | 5.76942600  | -1.58890900 | 0.23893600  |
| H | 6.58741300  | -1.01036800 | 0.67678100  |
| C | 5.98103600  | -2.92772500 | -0.10586600 |
| C | 4.89848900  | -3.63533000 | -0.64638600 |
| H | 5.02552200  | -4.68597600 | -0.92184800 |
| C | 3.66376700  | -3.02923100 | -0.84805000 |
| H | 2.83557500  | -3.59791100 | -1.27755000 |
| C | 7.32099000  | -3.58798100 | 0.07907500  |
| H | 7.98003400  | -2.98763900 | 0.72234000  |
| H | 7.83211000  | -3.72238100 | -0.88832100 |

|   |             |             |             |
|---|-------------|-------------|-------------|
| H | 7.21682900  | -4.58605100 | 0.53103400  |
| C | 3.02488100  | 2.31258300  | -1.13002200 |
| C | 2.47316700  | 2.93846300  | -0.00889700 |
| H | 1.79674800  | 2.39189200  | 0.64838100  |
| C | 2.79009500  | 4.26591900  | 0.27794200  |
| H | 2.34612000  | 4.73250000  | 1.16167400  |
| C | 3.66322300  | 5.00426500  | -0.52544400 |
| C | 4.21561000  | 4.35837600  | -1.64081200 |
| H | 4.90646500  | 4.90255600  | -2.29087600 |
| C | 3.90233600  | 3.03919100  | -1.94595300 |
| H | 4.34259300  | 2.55881400  | -2.82359600 |
| C | 3.99856300  | 6.43947600  | -0.21937800 |
| H | 3.59950500  | 6.74645600  | 0.75783800  |
| H | 3.57883000  | 7.11716800  | -0.98036300 |
| H | 5.08733000  | 6.60202100  | -0.20832200 |
| H | 3.52993400  | 0.50144100  | -1.95132700 |
| H | 1.35261200  | -1.79299800 | -0.65203900 |
| O | -0.25246000 | -2.26410000 | -0.77026000 |
| C | -0.43463200 | -2.26604100 | -2.14371900 |
| H | 0.04011800  | -1.40294200 | -2.65793700 |
| H | 0.02353800  | -3.17676000 | -2.57850900 |
| H | -1.49686000 | -2.27747700 | -2.45156600 |

**MeOH**

|   |             |             |             |
|---|-------------|-------------|-------------|
| C | 0.65175100  | -0.01908400 | 0.00000000  |
| H | 1.09546500  | 0.98773400  | -0.00000100 |
| H | 1.03140700  | -0.54915900 | -0.89441900 |
| H | 1.03140700  | -0.54915700 | 0.89442000  |
| O | -0.74260000 | 0.12302600  | 0.00000000  |
| H | -1.12798600 | -0.75912600 | 0.00000000  |

**TS\_I<sup>Tr</sup>·MeOH-6·CH<sub>2</sub>O**

|   |             |             |             |
|---|-------------|-------------|-------------|
| P | -2.34025500 | 0.36445700  | -0.80301700 |
| N | 0.56555200  | 0.41640700  | -0.91257600 |
| N | 2.25051400  | -1.17319100 | -0.89717100 |
| N | 2.73484200  | 0.98431400  | -1.63534000 |
| C | 0.29546600  | -1.89363500 | 2.07541200  |
| C | 0.72376700  | -0.56381800 | 2.28770800  |
| C | -0.45010400 | 0.27159100  | 2.47574900  |
| C | -1.61209200 | -0.60180400 | 2.47609200  |
| C | -1.16494000 | -1.91984900 | 2.17138800  |
| C | 1.13352500  | -3.08854100 | 1.77192600  |
| H | 2.20005000  | -2.87932500 | 1.92555000  |
| H | 1.00132600  | -3.39678900 | 0.71826100  |
| H | 0.84692200  | -3.93020500 | 2.42001000  |
| C | 2.12865200  | -0.07251500 | 2.36922800  |
| H | 2.32884900  | 0.28587700  | 3.39104300  |
| H | 2.31007300  | 0.76697500  | 1.68647200  |
| H | 2.84667500  | -0.86620900 | 2.13454000  |
| C | -0.41362700 | 1.70382700  | 2.89486600  |
| H | -1.36582100 | 2.20965400  | 2.69242300  |
| H | 0.38956000  | 2.24888900  | 2.37924100  |
| H | -0.22030600 | 1.76905100  | 3.97805900  |
| C | -3.00567300 | -0.19985500 | 2.82925100  |
| H | -3.16658700 | -0.37551400 | 3.90480400  |
| H | -3.75200900 | -0.78611700 | 2.27654700  |
| H | -3.18423800 | 0.86455000  | 2.63158900  |

|   |             |             |             |
|---|-------------|-------------|-------------|
| C | -1.98534800 | -3.16705500 | 2.12677700  |
| H | -1.65708700 | -3.83344100 | 1.31712000  |
| H | -3.05275100 | -2.94760200 | 1.99530300  |
| H | -1.87380400 | -3.71544600 | 3.07597000  |
| C | -1.39899500 | 1.18575400  | -2.15211200 |
| H | -1.31404200 | 0.44871900  | -2.96568100 |
| H | -1.93263100 | 2.06701000  | -2.53509400 |
| C | -0.01399000 | 1.54902400  | -1.63162300 |
| H | 0.61930500  | 1.83720300  | -2.48245300 |
| H | -0.07999600 | 2.43354100  | -0.97634600 |
| C | -3.38802600 | 1.63212800  | -0.01852900 |
| C | -2.78790600 | 2.80410900  | 0.46194100  |
| H | -1.71371400 | 2.96346500  | 0.34446000  |
| C | -3.55380200 | 3.77059700  | 1.10816600  |
| H | -3.07768000 | 4.68210800  | 1.47590300  |
| C | -4.92335600 | 3.57066000  | 1.29036800  |
| H | -5.52313300 | 4.32734700  | 1.80100100  |
| C | -5.52393500 | 2.40526000  | 0.81752500  |
| H | -6.59525900 | 2.24456600  | 0.95607400  |
| C | -4.76141000 | 1.43804800  | 0.16256900  |
| H | -5.24445700 | 0.52992600  | -0.20411200 |
| C | -3.50134000 | -0.77504400 | -1.61548800 |
| C | -3.79342800 | -2.01132400 | -1.03152200 |
| H | -3.30034200 | -2.30215900 | -0.10265600 |
| C | -4.70299700 | -2.87636200 | -1.63847500 |
| H | -4.92425400 | -3.84116500 | -1.17730500 |
| C | -5.32074100 | -2.51031800 | -2.83337100 |
| H | -6.02935600 | -3.18979200 | -3.31218500 |
| C | -5.03232600 | -1.27709300 | -3.42068900 |
| H | -5.51521400 | -0.98968200 | -4.35710000 |
| C | -4.12811800 | -0.40853800 | -2.81424500 |
| H | -3.91446100 | 0.55731500  | -3.27906900 |
| C | 1.83707900  | 0.07898000  | -1.12230600 |
| C | 3.57744600  | -1.55283500 | -0.63875500 |
| C | 4.52221800  | -0.73971600 | 0.01362300  |
| H | 4.26132100  | 0.27433000  | 0.31891100  |
| C | 5.79207500  | -1.22652100 | 0.30794600  |
| H | 6.50134600  | -0.56997300 | 0.82064200  |
| C | 6.17592400  | -2.53444200 | -0.01685800 |
| C | 5.22967800  | -3.33831400 | -0.66105600 |
| H | 5.48990900  | -4.36634400 | -0.92867900 |
| C | 3.95780700  | -2.86245600 | -0.97127100 |
| H | 3.23318800  | -3.51063600 | -1.46838600 |
| C | 7.55089700  | -3.04458100 | 0.32453900  |
| H | 8.33254100  | -2.47842600 | -0.20710700 |
| H | 7.66369100  | -4.10483400 | 0.05685600  |
| H | 7.75797500  | -2.94504400 | 1.40190300  |
| C | 2.93899500  | 2.32214200  | -1.25359300 |
| C | 2.32331400  | 2.90363300  | -0.14105400 |
| H | 1.62658100  | 2.32517600  | 0.46585100  |
| C | 2.60172300  | 4.22626500  | 0.20322100  |
| H | 2.10855900  | 4.65618500  | 1.07957800  |
| C | 3.49773500  | 5.00575400  | -0.53310400 |
| C | 4.11401800  | 4.40580200  | -1.64072300 |
| H | 4.82585500  | 4.98168800  | -2.23871200 |
| C | 3.84065600  | 3.09212300  | -2.00169000 |
| H | 4.33365200  | 2.64814000  | -2.87032500 |
| C | 3.78978500  | 6.43627000  | -0.16673900 |
| H | 3.35512400  | 6.69818300  | 0.80841100  |

|    |             |             |             |
|----|-------------|-------------|-------------|
| H  | 3.37603000  | 7.13120700  | -0.91545600 |
| H  | 4.87359500  | 6.62305200  | -0.11792400 |
| H  | 3.51864800  | 0.56440600  | -2.12597400 |
| O  | 0.80791600  | -3.12151200 | -1.44000900 |
| H  | 1.53010700  | -2.11598200 | -1.16438500 |
| C  | -0.39917800 | -2.64140600 | -1.66571700 |
| H  | -1.21832400 | -3.39012800 | -1.66202500 |
| H  | -0.81136200 | -1.90947200 | -0.79290400 |
| H  | -0.52000700 | -1.96847600 | -2.54396200 |
| Ir | -0.65683700 | -0.58167500 | 0.50462300  |

**TS\_I<sup>Rh</sup>·MeOH-5·CH<sub>2</sub>O**

|   |             |             |             |
|---|-------------|-------------|-------------|
| P | -2.40172400 | 0.29418000  | -0.75588900 |
| N | 0.51393000  | 0.35654900  | -0.83623900 |
| N | 2.20047100  | -1.22574500 | -0.76803000 |
| N | 2.68340500  | 0.91135400  | -1.57228200 |
| C | 0.20811600  | -1.91290300 | 2.14145400  |
| C | 0.63746700  | -0.57912700 | 2.32042400  |
| C | -0.53455900 | 0.25790400  | 2.48233700  |
| C | -1.69690300 | -0.60757300 | 2.50184200  |
| C | -1.24989200 | -1.92958800 | 2.23029600  |
| C | 1.04467200  | -3.11455500 | 1.87962200  |
| H | 2.10805200  | -2.91143300 | 2.06092500  |
| H | 0.93821500  | -3.42918200 | 0.82300000  |
| H | 0.73096900  | -3.94865700 | 2.52481600  |
| C | 2.04220900  | -0.09234200 | 2.41218200  |
| H | 2.23507900  | 0.25503000  | 3.43959900  |
| H | 2.22837500  | 0.75595300  | 1.74205100  |
| H | 2.76089900  | -0.88465600 | 2.17569200  |
| C | -0.49950900 | 1.70354400  | 2.84787800  |
| H | -1.45749800 | 2.19801200  | 2.64696300  |
| H | 0.29437000  | 2.23590600  | 2.30577400  |
| H | -0.28914100 | 1.80333700  | 3.92545500  |
| C | -3.08939200 | -0.19730700 | 2.84602300  |
| H | -3.25394400 | -0.37238900 | 3.92131100  |
| H | -3.83786100 | -0.78068200 | 2.29316500  |
| H | -3.26226900 | 0.86792900  | 2.64897200  |
| C | -2.07347300 | -3.17407800 | 2.19977500  |
| H | -1.75184100 | -3.84878300 | 1.39441700  |
| H | -3.14189200 | -2.95538500 | 2.07765100  |
| H | -1.95292300 | -3.71485300 | 3.15243500  |
| C | -1.44075800 | 1.09734300  | -2.10196600 |
| H | -1.34062400 | 0.34505700  | -2.89980500 |
| H | -1.97484900 | 1.96727600  | -2.51018700 |
| C | -0.06513200 | 1.47709200  | -1.56969700 |
| H | 0.57276300  | 1.76636600  | -2.41742400 |
| H | -0.14648400 | 2.36798300  | -0.92418100 |
| C | -3.45332100 | 1.57760400  | -0.00188400 |
| C | -2.86356200 | 2.77078100  | 0.43865400  |
| H | -1.79306300 | 2.94233200  | 0.30493900  |
| C | -3.63510300 | 3.74561600  | 1.06590000  |
| H | -3.16648200 | 4.67300800  | 1.40219400  |
| C | -4.99979000 | 3.53431300  | 1.26907200  |
| H | -5.60351300 | 4.29761000  | 1.76497800  |
| C | -5.59058700 | 2.34871200  | 0.83534900  |
| H | -6.65837900 | 2.17896300  | 0.98945200  |
| C | -4.82295300 | 1.37279800  | 0.20011100  |
| H | -5.29920100 | 0.44931600  | -0.13585600 |

|    |             |             |             |
|----|-------------|-------------|-------------|
| C  | -3.56088800 | -0.84847200 | -1.56585300 |
| C  | -3.85945300 | -2.07709100 | -0.96931900 |
| H  | -3.37295200 | -2.35779200 | -0.03404300 |
| C  | -4.76812400 | -2.94699700 | -1.57092500 |
| H  | -4.99466600 | -3.90562200 | -1.09957400 |
| C  | -5.37802000 | -2.59321200 | -2.77341900 |
| H  | -6.08616200 | -3.27610200 | -3.24803100 |
| C  | -5.08265300 | -1.36779600 | -3.37375700 |
| H  | -5.55969400 | -1.09021100 | -4.31611200 |
| C  | -4.17946900 | -0.49445800 | -2.77280200 |
| H  | -3.96028400 | 0.46521500  | -3.24772100 |
| C  | 1.78272900  | 0.01903200  | -1.03388300 |
| C  | 3.53578900  | -1.59676000 | -0.54302600 |
| C  | 4.48927600  | -0.77502700 | 0.08550200  |
| H  | 4.22327800  | 0.23423200  | 0.40306100  |
| C  | 5.77561300  | -1.24483800 | 0.33214600  |
| H  | 6.49337200  | -0.58117300 | 0.82342700  |
| C  | 6.16682900  | -2.54452600 | -0.01658700 |
| C  | 5.20971100  | -3.35914100 | -0.63056700 |
| H  | 5.47564000  | -4.38132700 | -0.91452800 |
| C  | 3.92128700  | -2.89983600 | -0.89412600 |
| H  | 3.18841500  | -3.55284700 | -1.37256900 |
| C  | 7.56288900  | -3.03379500 | 0.26435000  |
| H  | 8.31196700  | -2.44908800 | -0.29343700 |
| H  | 7.68275100  | -4.08936200 | -0.01840500 |
| H  | 7.81219500  | -2.94057400 | 1.33329200  |
| C  | 2.89784300  | 2.25310200  | -1.21349900 |
| C  | 2.28150400  | 2.85981200  | -0.11482200 |
| H  | 1.57607600  | 2.29663200  | 0.49596300  |
| C  | 2.56966100  | 4.18549900  | 0.20893800  |
| H  | 2.07542900  | 4.63428600  | 1.07523800  |
| C  | 3.47669100  | 4.94444200  | -0.53513800 |
| C  | 4.09342900  | 4.32008900  | -1.62905900 |
| H  | 4.81362900  | 4.87953700  | -2.23272100 |
| C  | 3.81077700  | 3.00275400  | -1.96924700 |
| H  | 4.30475700  | 2.53975700  | -2.82745000 |
| C  | 3.78050500  | 6.37787800  | -0.19002600 |
| H  | 3.34342000  | 6.65930400  | 0.77864700  |
| H  | 3.37680500  | 7.06523200  | -0.95117900 |
| H  | 4.86569900  | 6.55563300  | -0.13842900 |
| H  | 3.46616500  | 0.47866900  | -2.05312000 |
| O  | 0.75386700  | -3.18838100 | -1.24693600 |
| H  | 1.48002300  | -2.16519800 | -0.99960800 |
| C  | -0.45404700 | -2.72406400 | -1.51733500 |
| H  | -1.26036800 | -3.48711800 | -1.54256700 |
| H  | -0.89563100 | -2.00456600 | -0.67073300 |
| H  | -0.55207200 | -2.06904000 | -2.41212300 |
| Rh | -0.72161600 | -0.65169500 | 0.55236800  |

**TS\_II<sup>Ir</sup>-III<sup>Ir</sup>**

|   |             |             |             |
|---|-------------|-------------|-------------|
| P | -2.22756100 | 0.36503600  | 0.90281000  |
| N | 0.67361200  | 0.52711300  | 0.72136100  |
| N | 2.24168300  | -1.15561100 | 0.80869100  |
| N | 2.85158600  | 0.96672900  | 1.52702300  |
| C | 0.50505900  | -1.22712100 | -2.32724200 |
| C | -0.57193100 | -2.20519400 | -2.22429500 |
| C | -1.80752100 | -1.42929600 | -2.19999100 |
| C | -1.49584600 | -0.05018300 | -2.51812400 |

|   |             |             |             |
|---|-------------|-------------|-------------|
| C | -0.06209800 | 0.07017400  | -2.58208900 |
| C | 1.95504800  | -1.58463200 | -2.39718200 |
| H | 2.19348700  | -2.42428000 | -1.73083700 |
| H | 2.59918000  | -0.74129900 | -2.11760100 |
| H | 2.22344800  | -1.88725400 | -3.42249400 |
| C | -0.42168800 | -3.54388600 | -1.80124400 |
| C | -3.18574400 | -2.01328800 | -2.16753000 |
| H | -3.51750100 | -2.27476700 | -3.18563700 |
| H | -3.91233500 | -1.30285700 | -1.74892700 |
| H | -3.22014400 | -2.93060900 | -1.56350700 |
| C | -2.47078600 | 0.99604400  | -2.94413500 |
| H | -2.11467400 | 2.00548800  | -2.70126100 |
| H | -3.45430100 | 0.85476500  | -2.47888900 |
| H | -2.60391800 | 0.93656200  | -4.03666900 |
| C | 0.68954400  | 1.29638900  | -2.98196900 |
| H | 0.70026700  | 1.38098700  | -4.08065100 |
| H | 1.73272000  | 1.25750200  | -2.64271100 |
| H | 0.22035300  | 2.20444700  | -2.57980400 |
| C | -3.17781800 | -0.77437000 | 1.96606800  |
| C | -3.39139100 | -2.09686900 | 1.56279000  |
| H | -2.97777600 | -2.45088400 | 0.61617000  |
| C | -4.13651700 | -2.96495900 | 2.36191500  |
| H | -4.29769400 | -3.99588700 | 2.03938500  |
| C | -4.67275800 | -2.51488200 | 3.56692600  |
| H | -5.25423100 | -3.19412200 | 4.19440400  |
| C | -4.46906400 | -1.19403800 | 3.97157800  |
| H | -4.89214600 | -0.83785700 | 4.91344700  |
| C | -3.72871800 | -0.32497200 | 3.17418700  |
| H | -3.58581000 | 0.71008800  | 3.49507000  |
| C | -3.50168000 | 1.47682600  | 0.21741700  |
| C | -4.79470900 | 1.00530600  | -0.03834400 |
| H | -5.07805000 | -0.01148600 | 0.24376300  |
| C | -5.73330100 | 1.83237100  | -0.65478500 |
| H | -6.73939900 | 1.45544200  | -0.85156600 |
| C | -5.39108000 | 3.13575500  | -1.01327100 |
| H | -6.12810800 | 3.78296300  | -1.49394700 |
| C | -4.10627500 | 3.61288700  | -0.75199800 |
| H | -3.83370800 | 4.63407400  | -1.02740500 |
| C | -3.16326000 | 2.78667300  | -0.14475100 |
| H | -2.15575400 | 3.16985200  | 0.03346500  |
| C | -1.19199300 | 1.36998100  | 2.04866400  |
| H | -1.72089100 | 2.26808500  | 2.39814700  |
| H | -0.98685100 | 0.73162700  | 2.92186600  |
| C | 0.12198300  | 1.72157900  | 1.35571400  |
| H | -0.04019400 | 2.50299800  | 0.59522100  |
| H | 0.81220100  | 2.13444700  | 2.10415400  |
| C | 1.89573800  | 0.13918900  | 1.00314300  |
| C | 3.52702300  | -1.70824600 | 0.65431900  |
| C | 3.71702800  | -3.03894100 | 1.04001000  |
| H | 2.88534400  | -3.59248600 | 1.48273600  |
| C | 4.95137600  | -3.65834100 | 0.85706600  |
| H | 5.07209300  | -4.70075100 | 1.16380800  |
| C | 6.03433400  | -2.97289700 | 0.29749500  |
| C | 5.82804500  | -1.64121300 | -0.08765700 |
| H | 6.65000100  | -1.08123200 | -0.54235300 |
| C | 4.59731000  | -1.01287900 | 0.07337700  |
| H | 4.47413800  | 0.01588000  | -0.26859000 |
| C | 7.37342500  | -3.63114800 | 0.10069900  |
| H | 7.65760400  | -3.64167500 | -0.96347400 |



|    |             |             |             |
|----|-------------|-------------|-------------|
| H  | 7.36805300  | -4.67009500 | 0.45925600  |
| H  | 8.16633400  | -3.09030400 | 0.64103900  |
| C  | 3.15881600  | 2.28544000  | 1.13684600  |
| C  | 4.04787700  | 3.01939600  | 1.93308200  |
| H  | 4.45595200  | 2.56780600  | 2.84106400  |
| C  | 4.41221000  | 4.31093100  | 1.57095900  |
| H  | 5.11022200  | 4.86231700  | 2.20712500  |
| C  | 3.90142100  | 4.92043900  | 0.41601500  |
| C  | 3.01800500  | 4.17339800  | -0.36795800 |
| H  | 2.60573400  | 4.61091700  | -1.28147200 |
| C  | 2.64887200  | 2.87339800  | -0.02389000 |
| H  | 1.96334100  | 2.32290100  | -0.66751500 |
| C  | 4.28788300  | 6.32864200  | 0.05063300  |
| H  | 3.89645400  | 6.61021000  | -0.93725800 |
| H  | 5.38177100  | 6.45164200  | 0.03065800  |
| H  | 3.89541700  | 7.05040500  | 0.78508800  |
| H  | 3.57778800  | 0.50372300  | 2.06518100  |
| H  | -1.29618400 | -4.19660800 | -1.89662600 |
| H  | 0.53731500  | -4.02846100 | -2.01294400 |
| H  | 1.44424500  | -1.80501400 | 0.78462200  |
| O  | -0.23466800 | -2.43185600 | 0.55289700  |
| H  | -0.32746200 | -3.13313800 | -0.37769400 |
| H  | -0.80497900 | -2.73037200 | 1.27571900  |
| Ir | -0.68752800 | -0.53632200 | -0.58235200 |

**TS\_II<sup>Rh</sup>-III<sup>Rh</sup>**

|    |             |             |             |
|----|-------------|-------------|-------------|
| Rh | -0.73370300 | -0.59057400 | -0.65143100 |
| P  | -2.28616600 | 0.29166700  | 0.83082600  |
| N  | 0.61905000  | 0.50396700  | 0.61938400  |
| N  | 2.16972900  | -1.18784200 | 0.71400900  |
| N  | 2.79062600  | 0.92359800  | 1.46119300  |
| C  | 0.43469900  | -1.24135500 | -2.40210800 |
| C  | -0.65304300 | -2.20333700 | -2.29670300 |
| C  | -1.87794500 | -1.41777200 | -2.26602900 |
| C  | -1.54998200 | -0.04471400 | -2.56544500 |
| C  | -0.11956200 | 0.05844100  | -2.63405400 |
| C  | 1.87966600  | -1.61419400 | -2.47526600 |
| H  | 2.11058400  | -2.46212400 | -1.81698500 |
| H  | 2.53418100  | -0.77993200 | -2.19298000 |
| H  | 2.14086700  | -1.91264600 | -3.50374500 |
| C  | -0.51311600 | -3.55392500 | -1.89709400 |
| C  | -3.26131300 | -1.98653700 | -2.22506000 |
| H  | -3.60226700 | -2.23230800 | -3.24414800 |
| H  | -3.97830300 | -1.27336600 | -1.79518500 |
| H  | -3.30094700 | -2.91090400 | -1.63272000 |
| C  | -2.50855200 | 1.02690900  | -2.96264100 |
| H  | -2.14742900 | 2.02307600  | -2.67551400 |
| H  | -3.50254200 | 0.87729800  | -2.52341800 |
| H  | -2.62070100 | 1.01310400  | -4.05926700 |
| C  | 0.63923900  | 1.29302100  | -2.99074400 |
| H  | 0.61026600  | 1.44259600  | -4.08217900 |
| H  | 1.69323000  | 1.22087500  | -2.69366100 |
| H  | 0.19922100  | 2.18385100  | -2.52193300 |
| C  | -3.21147100 | -0.86119300 | 1.90027900  |
| C  | -3.40060700 | -2.18726000 | 1.49686500  |
| H  | -2.97585100 | -2.53358200 | 0.55260900  |
| C  | -4.13055000 | -3.06864500 | 2.29563600  |
| H  | -4.27314300 | -4.10224800 | 1.97285900  |

|   |             |             |             |
|---|-------------|-------------|-------------|
| C | -4.67437900 | -2.62837700 | 3.50081000  |
| H | -5.24398400 | -3.31792000 | 4.12796100  |
| C | -4.49301000 | -1.30447200 | 3.90657800  |
| H | -4.92162900 | -0.95659100 | 4.84905500  |
| C | -3.76864400 | -0.42189500 | 3.10938800  |
| H | -3.64345700 | 0.61550700  | 3.43036600  |
| C | -3.58292200 | 1.39855700  | 0.17965100  |
| C | -4.86241700 | 0.90225800  | -0.10011500 |
| H | -5.11959900 | -0.13096200 | 0.14549100  |
| C | -5.82086700 | 1.72468300  | -0.69094600 |
| H | -6.81562000 | 1.32771800  | -0.90522500 |
| C | -5.51300800 | 3.04895800  | -1.00193700 |
| H | -6.26539700 | 3.69257700  | -1.46323400 |
| C | -4.24337000 | 3.55117900  | -0.71620600 |
| H | -3.99792000 | 4.58895800  | -0.95233500 |
| C | -3.28059400 | 2.73004000  | -0.13265700 |
| H | -2.28698700 | 3.13628300  | 0.06958200  |
| C | -1.24553000 | 1.30839700  | 1.96248600  |
| H | -1.78508900 | 2.19288700  | 2.33053900  |
| H | -1.01448000 | 0.66673100  | 2.82689200  |
| C | 0.05264900  | 1.68822800  | 1.25304700  |
| H | -0.13406800 | 2.46415900  | 0.49167100  |
| H | 0.73902700  | 2.12332300  | 1.99327000  |
| C | 1.83204100  | 0.10949600  | 0.91599300  |
| C | 3.45115900  | -1.75108800 | 0.57707100  |
| C | 3.62612700  | -3.08389000 | 0.96412300  |
| H | 2.78446500  | -3.63120800 | 1.39539800  |
| C | 4.85819200  | -3.71264400 | 0.79822700  |
| H | 4.96655900  | -4.75613400 | 1.10615100  |
| C | 5.95455900  | -3.03535000 | 0.25493000  |
| C | 5.76390200  | -1.70194500 | -0.13221300 |
| H | 6.59663100  | -1.14798700 | -0.57466700 |
| C | 4.53560100  | -1.06447900 | 0.01144600  |
| H | 4.42446300  | -0.03471100 | -0.33170100 |
| C | 7.29154400  | -3.70365500 | 0.07777600  |
| H | 7.59188100  | -3.71624800 | -0.98193600 |
| H | 7.27291700  | -4.74261100 | 0.43597200  |
| H | 8.08040500  | -3.16911500 | 0.63022700  |
| C | 3.10714000  | 2.24807500  | 1.10271800  |
| C | 3.99233700  | 2.96055700  | 1.92212600  |
| H | 4.39205300  | 2.48663100  | 2.82246700  |
| C | 4.36540200  | 4.25857100  | 1.59231100  |
| H | 5.06111900  | 4.79167600  | 2.24619700  |
| C | 3.86711900  | 4.89616100  | 0.44779700  |
| C | 2.98842400  | 4.16963500  | -0.36141100 |
| H | 2.58785600  | 4.62895800  | -1.26949500 |
| C | 2.61101500  | 2.86409400  | -0.05022800 |
| H | 1.93166800  | 2.32866400  | -0.71290000 |
| C | 4.25113600  | 6.31482300  | 0.12220800  |
| H | 5.32403000  | 6.48917100  | 0.29343900  |
| H | 3.70133400  | 7.02849300  | 0.75774500  |
| H | 4.02634600  | 6.56277800  | -0.92505200 |
| H | 3.50786700  | 0.44821500  | 2.00030400  |
| H | -1.39641000 | -4.19344200 | -2.00344200 |
| H | 0.43368700  | -4.04521600 | -2.14647700 |
| H | 1.36234500  | -1.82817000 | 0.67171500  |
| O | -0.28978400 | -2.47024800 | 0.44197500  |
| H | -0.39913900 | -3.18933600 | -0.52062900 |
| H | -0.82291700 | -2.77419700 | 1.18938800  |

**TS\_IV<sup>Ir</sup>-v<sup>Ir</sup>**

|   |             |             |             |
|---|-------------|-------------|-------------|
| P | -2.23190600 | 0.42405400  | 0.83457200  |
| N | 0.68593900  | 0.54958400  | 0.71042000  |
| N | 2.29686300  | -1.09355700 | 0.73395400  |
| N | 2.86018200  | 1.01935100  | 1.51410800  |
| C | 0.55561900  | -1.22897900 | -2.32148300 |
| C | -0.47358100 | -2.25012700 | -2.18720400 |
| C | -1.74474200 | -1.53197500 | -2.18664300 |
| C | -1.49704100 | -0.15339800 | -2.54609500 |
| C | -0.07114100 | 0.03571100  | -2.60738000 |
| C | 2.01897000  | -1.52183100 | -2.41233100 |
| H | 2.30524700  | -2.35736200 | -1.76027000 |
| H | 2.63185000  | -0.65474400 | -2.13536800 |
| H | 2.28262200  | -1.80212700 | -3.44529800 |
| C | -0.26518900 | -3.56904000 | -1.72569300 |
| C | -3.09343500 | -2.18087900 | -2.16127700 |
| H | -3.40110700 | -2.46089100 | -3.18204800 |
| H | -3.85849900 | -1.50549700 | -1.75355400 |
| H | -3.08764800 | -3.09774700 | -1.55571800 |
| C | -2.52098100 | 0.82816300  | -3.00833400 |
| H | -2.21359700 | 1.86236600  | -2.80903000 |
| H | -3.49513700 | 0.66061000  | -2.53257500 |
| H | -2.65376500 | 0.71587300  | -4.09674400 |
| C | 0.62135300  | 1.28369700  | -3.04584000 |
| H | 0.64425600  | 1.32758900  | -4.14684100 |
| H | 1.65964500  | 1.31411600  | -2.69113600 |
| H | 0.09949300  | 2.17987400  | -2.68378000 |
| C | -3.29195600 | -0.64376900 | 1.86487000  |
| C | -3.57865900 | -1.94687900 | 1.45019600  |
| H | -3.12577700 | -2.33367900 | 0.53620800  |
| C | -4.42806600 | -2.75503500 | 2.20576700  |
| H | -4.64598600 | -3.77280800 | 1.87468700  |
| C | -4.99020000 | -2.26491300 | 3.38319100  |
| H | -5.65225900 | -2.89828400 | 3.97807500  |
| C | -4.70697900 | -0.96363500 | 3.80355200  |
| H | -5.14760700 | -0.57690100 | 4.72512500  |
| C | -3.86584800 | -0.15278200 | 3.04572300  |
| H | -3.66315400 | 0.86928900  | 3.37533300  |
| C | -3.42243700 | 1.59765300  | 0.09525200  |
| C | -4.75209800 | 1.22336500  | -0.13130100 |
| H | -5.11311700 | 0.24426700  | 0.19171900  |
| C | -5.62906200 | 2.09825500  | -0.77242700 |
| H | -6.66379300 | 1.79467000  | -0.94636900 |
| C | -5.18939100 | 3.35530200  | -1.18440900 |
| H | -5.87826300 | 4.04056800  | -1.68336900 |
| C | -3.86725000 | 3.73692600  | -0.95363300 |
| H | -3.51661700 | 4.72118900  | -1.27208000 |
| C | -2.98619200 | 2.86129000  | -0.32356300 |
| H | -1.94932100 | 3.16945500  | -0.17361000 |
| C | -1.20291300 | 1.39431800  | 2.01440800  |
| H | -1.72405900 | 2.29810400  | 2.36120800  |
| H | -1.03109400 | 0.74185400  | 2.88469500  |
| C | 0.13215500  | 1.73538800  | 1.35927600  |
| H | 0.00478800  | 2.53998800  | 0.61647900  |
| H | 0.81003500  | 2.11881600  | 2.13409300  |
| C | 1.92091400  | 0.18432300  | 0.97102000  |
| C | 3.59517900  | -1.61659400 | 0.58349200  |

|    |             |             |             |
|----|-------------|-------------|-------------|
| C  | 3.80959800  | -2.94978500 | 0.95099100  |
| H  | 2.98757500  | -3.52553500 | 1.38343300  |
| C  | 5.05654100  | -3.54078600 | 0.76818000  |
| H  | 5.19703700  | -4.58463400 | 1.06152900  |
| C  | 6.13074600  | -2.82416100 | 0.22768800  |
| C  | 5.90177200  | -1.49096000 | -0.13421900 |
| H  | 6.71614300  | -0.90429800 | -0.56795100 |
| C  | 4.65548300  | -0.89080800 | 0.02526500  |
| H  | 4.51506300  | 0.14116800  | -0.29968200 |
| C  | 7.47190700  | -3.47066600 | 0.00721900  |
| H  | 7.63877800  | -4.30194300 | 0.70741000  |
| H  | 8.29173400  | -2.74776100 | 0.12928100  |
| H  | 7.54675100  | -3.88049600 | -1.01371100 |
| C  | 3.13772000  | 2.35221200  | 1.14933000  |
| C  | 3.98574500  | 3.10075200  | 1.97585400  |
| H  | 4.38601900  | 2.64815100  | 2.88672400  |
| C  | 4.31876600  | 4.40750000  | 1.63977200  |
| H  | 4.98551700  | 4.97070400  | 2.29872600  |
| C  | 3.81426400  | 5.01783300  | 0.48243700  |
| C  | 2.97082900  | 4.25652300  | -0.33132100 |
| H  | 2.56471800  | 4.69585800  | -1.24663500 |
| C  | 2.63579500  | 2.94020500  | -0.01471800 |
| H  | 1.98170500  | 2.37704800  | -0.68068000 |
| C  | 4.16888100  | 6.44106000  | 0.14402700  |
| H  | 3.77550000  | 6.73078100  | -0.84068300 |
| H  | 5.25985500  | 6.58907100  | 0.13094700  |
| H  | 3.75754700  | 7.14088300  | 0.88922900  |
| H  | 3.60285800  | 0.55869000  | 2.03146000  |
| H  | -1.11038400 | -4.26171500 | -1.80168800 |
| H  | 0.71267200  | -4.01817600 | -1.92918500 |
| H  | 1.50677900  | -1.74888500 | 0.64795500  |
| O  | -0.15870600 | -2.39428800 | 0.58370900  |
| H  | -0.19607800 | -3.13478200 | -0.32492000 |
| C  | -0.45770600 | -2.90122900 | 1.86641000  |
| H  | 0.41199300  | -3.43555600 | 2.28731700  |
| H  | -0.71090000 | -2.07214100 | 2.54357900  |
| H  | -1.31157200 | -3.59728300 | 1.83635400  |
| Ir | -0.66861400 | -0.53669300 | -0.59263000 |

TS\_IV<sup>Rh</sup>-v<sup>Rh</sup>

|    |             |             |             |
|----|-------------|-------------|-------------|
| Rh | 0.70925900  | -0.54580000 | 0.67282400  |
| P  | 2.28804100  | 0.34429600  | -0.77860200 |
| N  | -0.62925500 | 0.54720700  | -0.61733000 |
| N  | -2.21269900 | -1.11137100 | -0.62191000 |
| N  | -2.79427400 | 0.97570700  | -1.47319000 |
| C  | -0.47452600 | -1.20289800 | 2.42167400  |
| C  | 0.60380400  | -2.17381000 | 2.30468800  |
| C  | 1.83666600  | -1.40070600 | 2.28627000  |
| C  | 1.52096100  | -0.02842000 | 2.59796100  |
| C  | 0.09094300  | 0.08901000  | 2.66208800  |
| C  | -1.92174800 | -1.56390900 | 2.51111700  |
| H  | -2.16496100 | -2.42283500 | 1.87210900  |
| H  | -2.57529700 | -0.73139300 | 2.22131800  |
| H  | -2.17370300 | -1.84275800 | 3.54743400  |
| C  | 0.44804000  | -3.51963800 | 1.89445600  |
| C  | 3.21573500  | -1.98036700 | 2.25216000  |
| H  | 3.55410800  | -2.21548700 | 3.27462200  |
| H  | 3.93819400  | -1.27776000 | 1.81389600  |
| H  | 3.24894900  | -2.91197500 | 1.67123500  |
| C  | 2.48874100  | 1.02643000  | 3.01640700  |
| H  | 2.13883900  | 2.03168300  | 2.74816800  |
| H  | 3.48213700  | 0.87474800  | 2.57712200  |
| H  | 2.59755600  | 0.99035200  | 4.11290500  |
| C  | -0.65754300 | 1.32760000  | 3.02702200  |
| H  | -0.65218100 | 1.45421300  | 4.12178200  |
| H  | -1.70511800 | 1.27868200  | 2.70340200  |
| H  | -0.19352900 | 2.22108100  | 2.58747200  |
| C  | 3.28643400  | -0.78347200 | -1.80522000 |
| C  | 3.47068900  | -2.10950100 | -1.40478700 |
| H  | 2.96830600  | -2.47622400 | -0.50817200 |
| C  | 4.27219700  | -2.96621600 | -2.15975000 |
| H  | 4.41008500  | -4.00180300 | -1.84109000 |
| C  | 4.88737000  | -2.50176600 | -3.32082900 |
| H  | 5.51280600  | -3.17270900 | -3.91419000 |
| C  | 4.70362700  | -1.17839300 | -3.72820400 |
| H  | 5.18481600  | -0.81289500 | -4.63810300 |
| C  | 3.91049300  | -0.31954600 | -2.97193900 |
| H  | 3.78335600  | 0.71853000  | -3.29028500 |
| C  | 3.53577200  | 1.49360500  | -0.10001200 |
| C  | 4.83084600  | 1.04353500  | 0.18767200  |
| H  | 5.12852000  | 0.02204200  | -0.06037400 |
| C  | 5.75450500  | 1.89696400  | 0.78991400  |
| H  | 6.76127900  | 1.53486700  | 1.00985000  |
| C  | 5.39727200  | 3.20766400  | 1.10466900  |
| H  | 6.12268200  | 3.87597800  | 1.57393200  |
| C  | 4.11203800  | 3.66423900  | 0.81254900  |
| H  | 3.82696900  | 4.69102300  | 1.05230700  |
| C  | 3.18383500  | 2.81167400  | 0.21824200  |
| H  | 2.17782700  | 3.18508100  | 0.01478200  |
| C  | 1.25871400  | 1.32431700  | -1.95219500 |
| H  | 1.79774100  | 2.20505400  | -2.33039100 |
| H  | 1.05083500  | 0.66023100  | -2.80569800 |
| C  | -0.05529500 | 1.71321100  | -1.27795100 |
| H  | 0.11164300  | 2.51421900  | -0.53877300 |
| H  | -0.73117300 | 2.11995800  | -2.04352500 |
| C  | -1.85166900 | 0.16607500  | -0.89255400 |
| C  | -3.49609000 | -1.66886200 | -0.48437600 |
| C  | -3.63836200 | -3.03546600 | -0.74925200 |
| H  | -2.77077800 | -3.60809300 | -1.08761900 |

|   |             |             |             |
|---|-------------|-------------|-------------|
| C | -4.86811100 | -3.66602600 | -0.57691200 |
| H | -4.94974500 | -4.73569700 | -0.78781700 |
| C | -5.99613700 | -2.95746000 | -0.15022000 |
| C | -5.83753100 | -1.59184800 | 0.11981700  |
| H | -6.69468700 | -1.01174100 | 0.47317800  |
| C | -4.61119300 | -0.95069300 | -0.02893700 |
| H | -4.52807600 | 0.10615500  | 0.22832900  |
| C | -7.33397600 | -3.62587600 | 0.01970200  |
| H | -7.26849800 | -4.70856300 | -0.15835900 |
| H | -8.07565000 | -3.21377300 | -0.68313700 |
| H | -7.73098800 | -3.47195400 | 1.03524600  |
| C | -3.09328400 | 2.31199400  | -1.14145600 |
| C | -3.94680800 | 3.03054200  | -1.98906300 |
| H | -4.33577500 | 2.55250600  | -2.89186100 |
| C | -4.30062000 | 4.33949500  | -1.68370700 |
| H | -4.97144100 | 4.87829400  | -2.35876500 |
| C | -3.81296200 | 4.98235800  | -0.53696000 |
| C | -2.96420800 | 4.25085800  | 0.29844200  |
| H | -2.57139200 | 4.71538400  | 1.20713700  |
| C | -2.60777500 | 2.93321400  | 0.01266800  |
| H | -1.95264900 | 2.39284200  | 0.69605500  |
| C | -4.19042200 | 6.40734000  | -0.23189000 |
| H | -5.28298300 | 6.54308600  | -0.24389900 |
| H | -3.77145200 | 7.09890400  | -0.98061700 |
| H | -3.82107100 | 6.71943900  | 0.75536200  |
| H | -3.52122400 | 0.49518800  | -1.99452800 |
| H | 1.32703400  | -4.16720200 | 1.98654200  |
| H | -0.49940500 | -4.00501700 | 2.15296800  |
| H | -1.40904600 | -1.74196700 | -0.47994400 |
| O | 0.23297900  | -2.43309700 | -0.42474800 |
| H | 0.31727800  | -3.16790800 | 0.52766400  |
| C | 0.36124700  | -2.95019000 | -1.72711100 |
| H | -0.60551900 | -3.33182100 | -2.10577800 |
| H | 0.70551300  | -2.16485400 | -2.41786200 |
| H | 1.09234300  | -3.77495600 | -1.76224500 |

**v<sup>1r</sup>**

|   |             |             |             |
|---|-------------|-------------|-------------|
| P | 2.29506300  | 0.41040300  | -0.87447200 |
| N | -0.59118100 | 0.57598300  | -0.87699500 |
| N | -2.28265900 | -0.99660300 | -0.77658200 |
| N | -2.77485100 | 1.11780700  | -1.58409300 |
| C | -0.51102200 | -1.35799000 | 2.29267700  |
| C | 0.59381600  | -2.33155400 | 2.13424700  |
| C | 1.79750600  | -1.47943200 | 2.02826500  |
| C | 1.48070100  | -0.18128900 | 2.55222700  |
| C | 0.02579400  | -0.12466200 | 2.71065900  |
| C | -1.94503100 | -1.77028900 | 2.35463200  |
| H | -2.18140500 | -2.50881300 | 1.57653700  |
| H | -2.62694500 | -0.91920500 | 2.23386600  |
| H | -2.15929700 | -2.23866500 | 3.32971600  |
| C | 0.49784600  | -3.67010300 | 1.97688400  |
| C | 3.17677400  | -2.03573600 | 1.86015400  |
| H | 3.51421900  | -2.52619700 | 2.78830200  |
| H | 3.90031100  | -1.24757000 | 1.61201400  |
| H | 3.20743900  | -2.78510300 | 1.05633700  |
| C | 2.43539100  | 0.84683600  | 3.06609600  |
| H | 2.05754200  | 1.86538500  | 2.90010100  |
| H | 3.41615900  | 0.76514900  | 2.58029200  |
| H | 2.58214100  | 0.71193700  | 4.15025700  |
| C | -0.72829400 | 1.04128500  | 3.25913700  |
| H | -0.71414700 | 1.00778700  | 4.36102600  |
| H | -1.77797000 | 1.03008200  | 2.93663500  |
| H | -0.27538300 | 1.99338800  | 2.94975300  |
| C | 3.22964000  | -0.85543800 | -1.80014400 |
| C | 2.81603400  | -2.19144800 | -1.74091600 |
| H | 1.96079900  | -2.47164600 | -1.12024400 |
| C | 3.47708700  | -3.16467900 | -2.49051500 |
| H | 3.14934800  | -4.20520800 | -2.43731800 |
| C | 4.55102500  | -2.80920600 | -3.30475200 |
| H | 5.07079500  | -3.57254100 | -3.88839200 |
| C | 4.95924800  | -1.47600300 | -3.37879500 |
| H | 5.79564000  | -1.19364800 | -4.02201900 |
| C | 4.30056100  | -0.50123700 | -2.63318700 |
| H | 4.62750900  | 0.53991200  | -2.69862100 |
| C | 3.53382100  | 1.54877900  | -0.17297700 |
| C | 4.80588900  | 1.10338200  | 0.20515800  |
| H | 5.11765100  | 0.07799400  | -0.00567100 |
| C | 5.68559200  | 1.96669100  | 0.85787000  |
| H | 6.67651500  | 1.61032400  | 1.14788900  |
| C | 5.30252700  | 3.27740400  | 1.13912800  |
| H | 5.99305400  | 3.95212400  | 1.65002700  |
| C | 4.03530600  | 3.72610600  | 0.76451300  |
| H | 3.73020900  | 4.75208700  | 0.98192700  |
| C | 3.15299200  | 2.86594400  | 0.11514200  |
| H | 2.15716900  | 3.22493600  | -0.15631800 |
| C | 1.35191000  | 1.32853900  | -2.16732800 |
| H | 1.90320600  | 2.20672800  | -2.53310200 |
| H | 1.22886200  | 0.62903100  | -3.00802400 |
| C | -0.01622800 | 1.70979200  | -1.60786800 |
| H | 0.07533400  | 2.58096800  | -0.93851500 |
| H | -0.66717400 | 2.01547900  | -2.43936400 |
| C | -1.85457500 | 0.25332100  | -1.06800000 |
| C | -3.61315200 | -1.39880900 | -0.53357600 |
| C | -4.00824800 | -2.67877900 | -0.93305200 |
| H | -3.30391200 | -3.31711200 | -1.46970900 |
| C | -5.28995400 | -3.14208200 | -0.64278800 |

|    |             |             |             |
|----|-------------|-------------|-------------|
| H  | -5.57356400 | -4.14998000 | -0.95745000 |
| C  | -6.21803000 | -2.34446900 | 0.03473500  |
| C  | -5.80809000 | -1.06257600 | 0.42616000  |
| H  | -6.50391400 | -0.41808400 | 0.97034300  |
| C  | -4.52618600 | -0.59312300 | 0.16075400  |
| H  | -4.23330000 | 0.39770200  | 0.51344900  |
| C  | -7.61318500 | -2.83091200 | 0.31990900  |
| H  | -7.95334600 | -2.51150000 | 1.31637900  |
| H  | -7.67492700 | -3.92732000 | 0.27069400  |
| H  | -8.32937600 | -2.42466700 | -0.41326900 |
| C  | -2.93850600 | 2.47778100  | -1.24452100 |
| C  | -3.70588900 | 3.28722600  | -2.08971600 |
| H  | -4.13257200 | 2.86149100  | -3.00132000 |
| C  | -3.92610500 | 4.62220900  | -1.76975900 |
| H  | -4.53313900 | 5.23548400  | -2.44137400 |
| C  | -3.38186500 | 5.19671700  | -0.61270800 |
| C  | -2.61993900 | 4.37240800  | 0.22149500  |
| H  | -2.18940700 | 4.78460600  | 1.13819400  |
| C  | -2.40122200 | 3.02823800  | -0.07711500 |
| H  | -1.80885800 | 2.41374100  | 0.60394200  |
| C  | -3.59785400 | 6.65278100  | -0.29865300 |
| H  | -2.96875100 | 7.29169200  | -0.94002600 |
| H  | -3.34611200 | 6.88094900  | 0.74686500  |
| H  | -4.64322900 | 6.94921700  | -0.47239000 |
| H  | -3.57366100 | 0.68888600  | -2.04237700 |
| H  | 1.39097100  | -4.28614100 | 1.84608400  |
| H  | -0.46585600 | -4.18062100 | 2.05154100  |
| H  | -1.58639200 | -1.75436800 | -0.82030500 |
| O  | -0.59599600 | -3.29076700 | -0.89012400 |
| H  | -0.15885500 | -3.33385300 | -0.02178700 |
| C  | -0.73958000 | -4.59272700 | -1.40651600 |
| H  | -1.18757300 | -4.51662100 | -2.40730000 |
| H  | 0.23462900  | -5.10102400 | -1.50966400 |
| H  | -1.39572400 | -5.22106800 | -0.77881600 |
| Ir | 0.69427500  | -0.29407500 | 0.60612000  |

$\mathbf{v}^{\text{Rh}}$



|    |             |             |             |
|----|-------------|-------------|-------------|
| Rh | 0.73584600  | -0.35981200 | 0.65347100  |
| P  | 2.36706200  | 0.33524100  | -0.80411100 |
| N  | -0.53993800 | 0.46895800  | -0.85980800 |
| N  | -2.23396600 | -1.08682500 | -0.74203400 |
| N  | -2.71224600 | 1.01379500  | -1.61060200 |
| C  | -0.47501500 | -1.31215000 | 2.36803100  |
| C  | 0.69032200  | -2.22108500 | 2.30153900  |
| C  | 1.85338900  | -1.31781100 | 2.21335400  |
| C  | 1.43469500  | -0.01100100 | 2.60339500  |
| C  | -0.02449200 | -0.02216900 | 2.69036100  |
| C  | -1.88319800 | -1.80640800 | 2.39918000  |
| H  | -2.04717000 | -2.59444800 | 1.65092700  |
| H  | -2.61063000 | -1.00550400 | 2.21750300  |
| H  | -2.10287400 | -2.24338700 | 3.38746500  |
| C  | 0.67541500  | -3.57061100 | 2.21525500  |
| C  | 3.26486300  | -1.80649600 | 2.13640000  |
| H  | 3.56794800  | -2.26301400 | 3.09323400  |
| H  | 3.96273700  | -0.98718900 | 1.91761800  |
| H  | 3.38030000  | -2.56896800 | 1.35248500  |
| C  | 2.30087300  | 1.12324900  | 3.04222800  |
| H  | 1.88988100  | 2.09171500  | 2.72474700  |
| H  | 3.31985700  | 1.03569300  | 2.64446100  |
| H  | 2.36594500  | 1.13076800  | 4.14277300  |
| C  | -0.86347700 | 1.14237500  | 3.10074900  |
| H  | -0.90396600 | 1.20318300  | 4.20072600  |
| H  | -1.89344900 | 1.04723200  | 2.73214200  |
| H  | -0.44471000 | 2.08889300  | 2.73172200  |
| C  | 3.34836300  | -0.93176600 | -1.67584800 |
| C  | 2.99145200  | -2.27783100 | -1.53819200 |
| H  | 2.15244800  | -2.55055800 | -0.89277700 |
| C  | 3.68890100  | -3.26379900 | -2.23717500 |
| H  | 3.40772200  | -4.31313300 | -2.12327300 |
| C  | 4.74245500  | -2.90930200 | -3.07810800 |
| H  | 5.29021600  | -3.68155000 | -3.62313000 |
| C  | 5.09681200  | -1.56667100 | -3.22657800 |
| H  | 5.91911200  | -1.28681400 | -3.88881500 |
| C  | 4.40281400  | -0.57998300 | -2.53062500 |
| H  | 4.68845700  | 0.46849900  | -2.65064800 |
| C  | 3.57556100  | 1.53179700  | -0.14464700 |
| C  | 4.84060300  | 1.11867900  | 0.29174700  |
| H  | 5.16407200  | 0.08508700  | 0.14831600  |
| C  | 5.70072500  | 2.02404900  | 0.91227300  |
| H  | 6.68565800  | 1.69066400  | 1.24679200  |
| C  | 5.30645200  | 3.34777700  | 1.10373100  |
| H  | 5.98117500  | 4.05564700  | 1.59030300  |
| C  | 4.04916700  | 3.76651700  | 0.66722900  |
| H  | 3.73589800  | 4.80303700  | 0.81073600  |
| C  | 3.18632700  | 2.86414300  | 0.04869600  |
| H  | 2.20035200  | 3.20653000  | -0.27523000 |
| C  | 1.41681100  | 1.19881400  | -2.12868300 |
| H  | 1.96575600  | 2.06321800  | -2.52991100 |
| H  | 1.29624600  | 0.46661000  | -2.94176400 |
| C  | 0.04639200  | 1.59431100  | -1.58624800 |
| H  | 0.13918200  | 2.46679900  | -0.91767600 |
| H  | -0.59165900 | 1.90682200  | -2.42640500 |

|   |             |             |             |
|---|-------------|-------------|-------------|
| C | -1.79747100 | 0.15530700  | -1.05998500 |
| C | -3.56129500 | -1.49410600 | -0.50553000 |
| C | -3.92446400 | -2.80230500 | -0.84091600 |
| H | -3.19443900 | -3.45674000 | -1.32214800 |
| C | -5.20593800 | -3.27259600 | -0.56142100 |
| H | -5.46370500 | -4.30111700 | -0.82798500 |
| C | -6.16674200 | -2.45552400 | 0.04328800  |
| C | -5.78861700 | -1.14720000 | 0.37451800  |
| H | -6.51042400 | -0.48634400 | 0.86243100  |
| C | -4.50754600 | -0.66912800 | 0.11911300  |
| H | -4.24213300 | 0.34450300  | 0.42535800  |
| C | -7.56195900 | -2.94916900 | 0.31624200  |
| H | -7.91444900 | -2.62658100 | 1.30761600  |
| H | -7.61611900 | -4.04625000 | 0.27348200  |
| H | -8.27349800 | -2.55112700 | -0.42578600 |
| C | -2.90348200 | 2.36674300  | -1.26261300 |
| C | -3.70107800 | 3.16374400  | -2.09264000 |
| H | -4.12887100 | 2.73362500  | -3.00176100 |
| C | -3.95265800 | 4.49025400  | -1.76012200 |
| H | -4.58351200 | 5.09170800  | -2.42048200 |
| C | -3.41247100 | 5.07115900  | -0.60427000 |
| C | -2.61987200 | 4.26072600  | 0.21433100  |
| H | -2.19124500 | 4.67617800  | 1.13065500  |
| C | -2.36819100 | 2.92546200  | -0.09783600 |
| H | -1.75489400 | 2.32220900  | 0.57354400  |
| C | -3.66474400 | 6.51811100  | -0.27443800 |
| H | -3.05371100 | 7.18008200  | -0.90991000 |
| H | -3.41588900 | 6.74137300  | 0.77294400  |
| H | -4.71783100 | 6.78985700  | -0.44195600 |
| H | -3.50132500 | 0.57668900  | -2.07747700 |
| H | 1.60531300  | -4.14098600 | 2.15206000  |
| H | -0.26096500 | -4.13087300 | 2.27995400  |
| H | -1.51395000 | -1.82330900 | -0.70301800 |
| O | -0.34010300 | -3.15193900 | -0.65851200 |
| H | 0.05539800  | -3.30627500 | 0.21661600  |
| C | -0.30325400 | -4.33390400 | -1.42618400 |
| H | -0.73326600 | -4.11144500 | -2.41260600 |
| H | 0.72913800  | -4.69262700 | -1.57708200 |
| H | -0.89180900 | -5.14462900 | -0.96372200 |

## 11. References

- [S1] (1) Carmona, M.; Ferrer, J.; Rodríguez, R.; Passarelli, V.; Lahoz, F. J.; García-Orduña, P.; Cañadillas-Delgado, L.; Carmona, D., *Chem. Eur. J.* **2019**, *25*, 13665-13670.
- [S2] SAINT+, *version 6.01: Area-Detector Integration Software*, Bruker AXS, Madison, WI, **2001**.
- [S3] (a) Blessing, R. H., *Acta Crystallogr.* **1995**, *A51*, 33-3. (b) SADABS, *Area Detector Absorption Correction Program*, Bruker AXS, Madison, WI, **1996**.
- [S4] (a) Sheldrick, G. M., *Acta Crystallogr.* **1990**, *A46*, 467-473. (b) Sheldrick, G. M., *Acta Crystallogr.* **2008**, *A64*, 112-122.
- [S5] Sheldrick, G. M., *Acta Crystallogr.* **2015**, *C71*, 3-8.
- [S6] Farrugia, L. J., *Acta Crystallogr.* **2012**, *45*, 849-854.
- [S7] Spek, A. L., *Acta Crystallogr. C* **2015**, *71*, 9-18.
- [S8] Sheldrick, G. M., *CELL NOW and TWINABS*. University of Göttingen, Germany, **1995**.
- [S9] Gaussian 09, Revision D.01, Frisch, M. J.; Trucks, G. W.; Schlegel, H. B.; Scuseria, G. E.; Robb, M. A.; Cheeseman, J. R.; Scalmani, G.; Barone, V.; Mennucci, B.; Petersson, G. A.; Nakatsuji, H.; Caricato, M.; Li, X.; Hratchian, H. P.; Izmaylov, A. F.; Bloino, J.; Zheng, G.; Sonnenberg, J. L.; Hada, M.; Ehara, M.; Toyota, K.; Fukuda, R.; Hasegawa, J.; Ishida, M.; Nakajima, T.; Honda, Y.; Kitao, O.; Nakai, H.; Vreven, T.; Montgomery, J. A.; Peralta, Jr. J. E.; Ogliaro, F.; Bearpark, M.; Heyd, J.

J.; Brothers, E.; Kudin, K. N.; Staroverov, V. N.; Kobayashi, R.; Normand, J.; Raghavachari, K.; Rendell, A.; Burant, J. C.; Iyengar, S. S.; Tomasi, J.; Cossi, M.; Rega, N.; Millam, J. M.; Klene, M.; Knox, J. E.; Cross, J. B.; Bakken, V.; Adamo, C.; Jaramillo, J.; Gomperts, R.; Stratmann, R. E.; Yazyev, O.; Austin, A. J.; Cammi, R.; Pomelli, C.; Ochterski, J. W.; Martin, R. L.; Morokuma, K.; Zakrzewski, V. G.; Voth, G. A.; Salvador, P.; Dannenberg, J. J.; Dapprich, S.; Daniels, A. D.; Farkas, C.; Foresman, J. B.; Ortiz, J. V.; Cioslowski, J.; Fox, D. J., Gaussian, Inc., Wallingford CT, **2009**.

[S10] Chai, J.-D.; Head-Gordon, M., *Phys. Chem. Chem. Phys.* **2008**, *10*, 6615-6620.

[S11] Weigend, F.; Ahlrichs, R., *Phys. Chem. Chem. Phys.* **2005**, *7*, 3297-3305.

[S12] Marenich, A. V.; Cramer, C. J.; Truhlar, D. G., *J. Phys. Chem. B*, **2009**, *113*, 6378-6396.

[S13] Bryantsev, V. S.; Diallo, M. S.; Goddard, W. A. III, *J. Phys. Chem. B* **2008**, *112*, 9709-9719.
